# Supplementary material for: Hypertension incidence among middle-aged and older adults: findings from a 5-year prospective study in rural South Africa, 2010–2015
Source: PubMed Central journal article supplement — BMJ Open. 2021 Dec 6;11(12):e049621. doi: 10.1136/bmjopen-2021-049621 (PMC8655592; doi:10.1136/bmjopen-2021-049621), 2021-12-06
Supplement: bmjopen-2021-049621.draft_revisions.pdf [file bmjopen-2021-049621.draft_revisions.pdf]

# BMJ Open

BMJ Open is committed to open peer review. As part of this commitment we make the peer review history of every article we publish publicly available.

When an article is published we post the peer reviewers' comments and the authors' responses online. We also post the versions of the paper that were used during peer review. These are the versions that the peer review comments apply to.

The versions of the paper that follow are the versions that were submitted during the peer review process. They are not the versions of record or the final published versions. They should not be cited or distributed as the published version of this manuscript.

BMJ Open is an open access journal and the full, final, typeset and author-corrected version of record of the manuscript is available on our site with no access controls, subscription charges or pay-per-view fees (<http://bmjopen.bmj.com>).

If you have any questions on BMJ Open's open peer review process please email [info.bmjopen@bmj.com](mailto:info.bmjopen@bmj.com)

# BMJ Open

## Hypertension incidence among middle-aged and older adults: Findings from a 5-year prospective study in rural South Africa, 2010-2015

|                               |                                                                                                                                                                                                                                                                                                                                                                                                                                                                                                                                                                                                                                                                                                                                                                                                                                                          |
|-------------------------------|----------------------------------------------------------------------------------------------------------------------------------------------------------------------------------------------------------------------------------------------------------------------------------------------------------------------------------------------------------------------------------------------------------------------------------------------------------------------------------------------------------------------------------------------------------------------------------------------------------------------------------------------------------------------------------------------------------------------------------------------------------------------------------------------------------------------------------------------------------|
| Journal:                      | <i>BMJ Open</i>                                                                                                                                                                                                                                                                                                                                                                                                                                                                                                                                                                                                                                                                                                                                                                                                                                          |
| Manuscript ID                 | bmjopen-2021-049621                                                                                                                                                                                                                                                                                                                                                                                                                                                                                                                                                                                                                                                                                                                                                                                                                                      |
| Article Type:                 | Original research                                                                                                                                                                                                                                                                                                                                                                                                                                                                                                                                                                                                                                                                                                                                                                                                                                        |
| Date Submitted by the Author: | 09-Feb-2021                                                                                                                                                                                                                                                                                                                                                                                                                                                                                                                                                                                                                                                                                                                                                                                                                                              |
| Complete List of Authors:     | Houle , Brian ; Australian National University, School of Demography; University of the Witwatersrand Faculty of Health Sciences<br>Gaziano, Thomas A.; Harvard University<br>Angotti, Nicole; University of the Witwatersrand Faculty of Health Sciences; American University, Department of Sociology<br>Mojola, Sanyu A; Princeton University, Department of Sociology<br>Kabudula, Chodziwadziwa; University of the Witwatersrand School of Public Health, MRC/Wits Rural Public Health and Health Transitions Research Unit (Agincourt),<br>Tollman, Stephen; University of the Witwatersrand; Umea University<br>Gómez-Olivé, F. Xavier; University of the Witwatersrand School of Public Health, MRC/Wits Rural Public Health and Health Transitions Research Unit (Agincourt); Harvard University, Center for Population and Development Studies |
| Keywords:                     | Hypertension < CARDIOLOGY, PUBLIC HEALTH, HIV & AIDS < INFECTIOUS DISEASES, EPIDEMIOLOGY                                                                                                                                                                                                                                                                                                                                                                                                                                                                                                                                                                                                                                                                                                                                                                 |
|                               |                                                                                                                                                                                                                                                                                                                                                                                                                                                                                                                                                                                                                                                                                                                                                                                                                                                          |

SCHOLARONE™  
Manuscripts

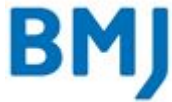

I, the Submitting Author has the right to grant and does grant on behalf of all authors of the Work (as defined in the below author licence), an exclusive licence and/or a non-exclusive licence for contributions from authors who are: i) UK Crown employees; ii) where BMJ has agreed a CC-BY licence shall apply, and/or iii) in accordance with the terms applicable for US Federal Government officers or employees acting as part of their official duties; on a worldwide, perpetual, irrevocable, royalty-free basis to BMJ Publishing Group Ltd ("BMJ") its licensees and where the relevant Journal is co-owned by BMJ to the co-owners of the Journal, to publish the Work in this journal and any other BMJ products and to exploit all rights, as set out in our [licence](#).

The Submitting Author accepts and understands that any supply made under these terms is made by BMJ to the Submitting Author unless you are acting as an employee on behalf of your employer or a postgraduate student of an affiliated institution which is paying any applicable article publishing charge ("APC") for Open Access articles. Where the Submitting Author wishes to make the Work available on an Open Access basis (and intends to pay the relevant APC), the terms of reuse of such Open Access shall be governed by a Creative Commons licence – details of these licences and which [Creative Commons](#) licence will apply to this Work are set out in our licence referred to above.

Other than as permitted in any relevant BMJ Author's Self Archiving Policies, I confirm this Work has not been accepted for publication elsewhere, is not being considered for publication elsewhere and does not duplicate material already published. I confirm all authors consent to publication of this Work and authorise the granting of this licence.

1  
2  
3 **Hypertension incidence among middle-aged and older adults: Findings from a 5-year**  
4 **prospective study in rural South Africa, 2010-2015**  
5  
6

7 Brian Houle,<sup>1,2,3</sup> Thomas Gaziano,<sup>4,5</sup> Nicole Angotti,<sup>2,3,6</sup> Sanyu A Mojola,<sup>7</sup> Chodziwadziwa W  
8 Kabudula,<sup>2,8</sup> Stephen M Tollman,<sup>2,8,9</sup> F Xavier Gómez-Olivé<sup>2,8,10</sup>  
9  
10  
11  
12  
13

14  
15 1 School of Demography, The Australian National University, Canberra, ACT, Australia

16  
17 2 MRC/Wits Rural Public Health and Health Transitions Research Unit (Agincourt), School  
18 of Public Health, Faculty of Health Sciences, University of the Witwatersrand, Johannesburg,  
19 South Africa  
20  
21  
22

23  
24 3 Institute of Behavioral Science, University of Colorado Boulder, Boulder, Colorado, USA

25  
26 4 Division of Cardiovascular Medicine, Brigham and Women's Hospital, Boston, MA, USA

27  
28 5 Harvard Medical School, Harvard University, Boston, MA, USA

29  
30 6 Department of Sociology and Center on Health, Risk and Society, American University,  
31 Washington, DC, USA  
32  
33

34  
35 7 Department of Sociology and Woodrow Wilson School of Public and International Affairs,  
36 and Office of Population Research, Princeton University, Princeton, NJ, USA  
37  
38

39  
40 8 INDEPTH Network, Accra, Ghana

41  
42 9 Centre for Global Health Research, Umeå University, Umeå, Sweden

43  
44 10 Harvard Center for Population and Development Studies, Harvard University, Cambridge,  
45 MA, USA  
46  
47

48  
49  
50  
51 **Correspondence to:** Brian Houle; [brian.houle@anu.edu.au](mailto:brian.houle@anu.edu.au)

52  
53 **Word count:** 3,045  
54  
55  
56  
57  
58  
59  
60

## ABSTRACT

**Objectives:** There have been urgent calls for longitudinal cohort studies in sub-Saharan Africa to understand the epidemiology of cardiovascular disease as a basis for intervention.

We estimated incident hypertension and associated sociodemographic, health and behavioural risk factors in a population aged 40 and older over a 5-year period.

**Design:** We assessed the association between incident hypertension and sociodemographic, health and behavioural factors using Poisson regression. We adjusted for nonresponse in 2015 using inverse probability sampling weights from a logistic regression including sex and age at baseline.

**Setting:** Rural South Africa.

**Participants:** We used a population-based cohort of normotensive adults in 2010 who were ages 40 and older at retest in 2015.

**Results:** Of 676 individuals completing baseline and 5-year follow-up, there were 193 incident cases of hypertension. The overall hypertension incidence rate was 8.374/100 person-years. In multivariable analyses, those that became hypertensive were more likely to have a high waist circumference (incidence rate ratio (IRR): 1.557 95% CI: 1.074-2.259) and be employed (IRR: 1.579 95% CI 1.071-2.329) at baseline. Being HIV-positive (regardless of antiretroviral therapy status) at baseline was inversely associated with incident hypertension.

**Conclusions:** Over a 5-year period, 29% of respondents developed hypertension. As the burden of hypertension continues to increase in sub-Saharan Africa, this study provides evidence of modifiable risk factors in a poor, rural South African setting to inform public health prevention strategies and programs. Continued longitudinal follow-up is needed to understand the complex interplay of noncommunicable and infectious diseases and their underlying and modifiable risk factors.

**Keywords:** Hypertension; incidence; South Africa; rural population; cohort

### Strengths and limitations of this study

- In response to the urgent call for longitudinal sub-Saharan African studies, we provide longitudinal evidence on hypertension incidence from a population-based cohort in rural South Africa.
- Our results that being HIV-positive was inversely related to increased BP may be sensitive to survivorship bias if those who died due to HIV/AIDS over the five-year period were also more likely to develop hypertension.
- A longer period of follow-up is needed to assess the effects of HIV and ART on hypertension and related cardiometabolic conditions.

## INTRODUCTION

Hypertension is one of the most important noncommunicable disease (NCD) risk factors and the largest contributor to the global burden of disease, with high blood pressure accounting for 7% of global disability-adjusted life years.<sup>1</sup> The burden of hypertension is greatest in low and middle-income countries (LMIC),<sup>2</sup> and has increased rapidly in sub-Saharan Africa.<sup>3-7</sup> A study of people aged 50 years and over from six countries found markedly high prevalence in South Africa (77.9%).<sup>8</sup>

Rapid demographic and epidemiological changes in LMICs, such as population aging, are expected to dramatically increase hypertension prevalence. Results from a modelling study found that without any changes in the age-specific prevalence of hypertension, the hypertensive population in South Africa is expected to grow by 105% by 2050.<sup>9</sup> These dramatic changes on the epidemiology of hypertension are further complicated by a lack of awareness by those with a hypertensive condition, with serious consequences of a low proportion of hypertensive individuals being on treatment.<sup>10-12</sup> In South Africa, an estimated 38-64% of hypertensives were aware of their status and 7.8-22.8% effectively controlled.<sup>8,13</sup>

Longitudinal data from sub-Saharan Africa are needed to examine changes on population-specific hypertension risk factors over time,<sup>14</sup> particularly given differences in socio-cultural environments and related health factors (e.g., diet, concurrent infectious diseases), and differentials in rural versus urban risk factor level.<sup>15</sup> This is particularly important as increased availability of antiretroviral therapy (ART) has reduced HIV/AIDS mortality<sup>16,17</sup> and the subsequent aging of people living with HIV.<sup>18</sup> The aging population will be at higher risk of developing hypertension, and the effect of HIV and ART may also increase the incidence of hypertension.<sup>19-22</sup> In South Africa, an emerging dual burden of disease, along

1  
2  
3 with urban-rural differences due to the legacy of the apartheid era also highlight the  
4 importance of understanding location-specific hypertension risk factors over time.<sup>23</sup>  
5  
6 However, there is currently a limited number of longitudinal studies examining risk factors  
7  
8 for incident hypertension in the region.<sup>24-27</sup>  
9  
10  
11  
12  
13

14 We use a population-based cohort of adults in rural South Africa who were normotensive in  
15 2010-11 and were 40 years or older in 2014-15 to estimate hypertension incidence and  
16  
17 identify sociodemographic, health and behavioural risk factors over a five-year period.  
18  
19  
20  
21  
22

## 23 **METHODS**

24 We use data from two survey studies conducted in 2010-11 and 2014-2015 in the Agincourt  
25  
26 Health and socio-Demographic Surveillance System (HDSS) study area in rural northeast  
27  
28 South Africa.<sup>28</sup> Since 1992, the Medical Research Council (MRC)/Wits Rural Public Health  
29  
30 and Health Transitions Unit has been conducting an annual census update of the population  
31  
32 living in the study site, including information on vital events (births, deaths, migrations) and  
33  
34 household and individual socio-demographic information. In 2010-11, the baseline study (Ha  
35  
36 Nakekela) included a sex-age stratified random sample of 7,662 men and women aged 15 and  
37  
38 older who were permanent residents from the 2009 HDSS census.<sup>29</sup> A follow-up study from  
39  
40 November 2014 to November 2015 (The Health and Aging in Africa: A Longitudinal Study  
41  
42 of an INDEPTH Community in South Africa (HAALSI)) included a random sample of 6,281  
43  
44 men and women aged 40 years and older who were permanent residents from the 2013 HDSS  
45  
46 census,<sup>30</sup> including those in the baseline study who fulfilled the inclusion criteria. Both  
47  
48 studies included information on sociodemographic factors and self-reported health and  
49  
50 conditions, anthropometric and blood pressure measurements, and point of care blood tests  
51  
52 for glucose and lipids, and dried blood spots (DBS) for HIV status.  
53  
54  
55  
56  
57  
58  
59  
60



## Outcome measure

**Blood pressure (BP) and hypertension.** BP was measured three times using a Boso BP instrument in 2010 and an Omron M6W automated cuff in 2015. Validation studies of similar blood pressure monitoring devices indicate that they can provide accurate measurements.<sup>31–33</sup> We used the average of the second and third measurements consistent with national surveillance guidance.<sup>34</sup> Hypertension was defined as a systolic blood pressure  $\geq 140$  mmHg or diastolic blood pressure  $\geq 90$  mmHg or if the respondent self-reported taking hypertensive medication.

## 2010 risk factors

**Anthropometry and high waist circumference.** Height, weight, and waist circumference were measured using a flexible stadiometer (Seca). High waist circumference was defined as  $>102$ cm for men and  $>88$ cm for women. Obesity was classified as a body mass index (BMI;  $\text{kg}/\text{m}^2$ )  $\geq 30$ .

**Random blood glucose and diabetes.** Point of care instruments were used to measure glucose (Caresens POP blood glucose meter). Diabetes was defined as a random blood glucose level of  $\geq 11.1$  mmol/L or if the respondent self-reported medication use for diabetes.

**High triglycerides.** A Cardiocheck instrument was used to measure lipid levels. High triglycerides was defined as  $\geq 1.7$  mmol/l.<sup>35</sup>

**HIV status.** HIV DBS were tested using screening assay Vironostika Uniform 11 (Biomerieux, France); with positive results retested using the SD Bioline HIV ELISA test

1  
2  
3 (SD; Standard Diagnostics Inc., Korea). If the two tests were inconsistent, we conducted a  
4  
5 third assay (Elecys, Roche, USA) that determined the final result.  
6  
7  
8  
9

10 **Socio-demographics and behaviours.** Respondents were asked about smoking and alcohol  
11 history, physical activity, and if they were using ART. Information on years of completed  
12 education, employment (currently working for pay), union (informal or formal) and  
13 socioeconomic status (based on tertiles of an asset index<sup>36</sup>) were extracted from the most  
14 recent surveillance census.  
15  
16  
17  
18  
19  
20  
21  
22  
23

24 **Cause of death:** For those who died between the baseline and follow-up study and for whom  
25 a death was identified from census updates, a verbal autopsy (VA) was conducted using a  
26 standardized VA instrument. For each identified death, a specially trained team conducted a  
27 VA interview with the closest living care taker to record signs and symptoms experienced  
28 before the death. We categorized cause of death using InterVA-4<sup>37</sup> – assigning a single cause  
29 for the largest likelihood for each death.  
30  
31  
32  
33  
34  
35  
36  
37  
38  
39

#### 40 **Analysis**

41  
42 We calculated hypertension incidence for those aged 40 years and older at the time of the  
43 second survey over five years overall, and by sex, age, and other socio-demographic factors.  
44 We calculated age-adjusted incidence using the Agincourt 2009 census population. We used  
45 Poisson regression to examine the association of hypertension status with socio-demographic,  
46 health and behavioural factors from the baseline study. To adjust for nonresponse in the  
47 follow-up study, we developed inverse probability sampling weights (IPSW) based on a  
48 logistic regression including sex and age at August 2010. We multiplied the IPSW for  
49 nonresponse by the inverse probability weights from the 2010 sample selection to derive our  
50  
51  
52  
53  
54  
55  
56  
57  
58  
59  
60

1  
2  
3 final weights for analysis. For our fully adjusted multivariable models, we fit separate models  
4 with and without HIV/ART status given a reduced sample of 2010 respondents with  
5 measured HIV status (particularly for the eligible sample estimates, see next paragraph).  
6  
7  
8  
9

10  
11  
12 We used two approaches to estimating exposure time for our incidence estimates. For the first  
13 approach, we included only those individuals who participated in both surveys. For incident  
14 cases, we defined exposure time as the midpoint between the dates of the first and second  
15 survey assessments. For the second approach, we included all eligible individuals from the  
16 first survey who were able to be tracked from census data. For those who out-migrated or  
17 died before the start of the second study, we allowed them to contribute exposure time  
18 between their blood pressure measurement in the first study and time at death or out-  
19 migration. For those who were not found or refused to participate in the second survey, we  
20 allowed exposure time between the first study's measurement and the start of the second  
21 study. As the second approach includes additional exposure time but no new incident cases, it  
22 provides a lower bound for our estimate of hypertension incidence. Individuals who aged to  
23 40 during the follow-up time only contributed to exposure when they had reached 40 years or  
24 older. We used Stata 15 for all statistical analyses.<sup>38</sup>  
25  
26  
27  
28  
29  
30  
31  
32  
33  
34  
35  
36  
37  
38  
39  
40  
41  
42  
43  
44

45 We also tested the sensitivity of our results. We tested models using either BMI or waist-to-  
46 hip ratio instead of waist circumference. We also tested a model of hypertension based on  
47 only BP thresholds to assess if there were differences in the associations between predictors  
48 and incident BP only. Finally, we tested a competing-risk model for those eligible individuals  
49 who either died, migrated, or completed the follow-up study to test for bias in our risk factor  
50 associations. We modelled incident hypertension as the main event and death due to any  
51 cause as a competing event (censoring those who out-migrated) using the Fine-Grey model.<sup>39</sup>  
52  
53  
54  
55  
56  
57  
58  
59  
60

## Patient and public involvement

Neither study participants nor public were involved in study design or conduct of the study.

The HDSS Learning, Information dissemination and Networking with Community (LINC) office manages community liaison with the HDSS study communities and their leaders.

Annual feedback of findings from the HDSS and projects are provided to open village meetings with participation commonly from local service providers.

## RESULTS

Figure 1 shows the participant flowchart. A total of 977 individuals were eligible for analysis from the first study and 676 (69%) also completed the second study. Table 1 presents sample characteristics from the baseline study comparing those who completed the second study and those who did not. Women, those with a high waist circumference, those in older ages and in a union with lower completed education were more likely to participate in the second study.

There were 193 incident cases of hypertension since baseline. The overall hypertension incidence rate was 8.374 per 100 person-years for those completing both studies (men 9.097; women 8.159; Table 2). The overall age adjusted hypertension incidence rate for those completing both studies was 8.372 per 100 person-years (men 8.955; women 8.50). Rates were lower when including the full eligible sample (Online supplemental table 1). By age, men in their 40s and 50s had higher incidence compared to same aged women, while women showed higher rates than men from ages 60-plus (Figure 2).

Table 2 shows incident rates and ratios for those completing both studies by baseline socio-demographic, health, and behavioural factors. Older age individuals were associated with

1  
2  
3 higher incident hypertension risk compared to those ages 40-49. Those with high waist  
4 circumference and elevated triglycerides had a higher risk of incident hypertension.  
5  
6 Respondents engaging in high physical activity levels had a lower risk of incident  
7  
8 hypertension compared to those with low physical activity levels. Those HIV-positive and  
9  
10 not on ART at baseline had a 55% lower risk of developing hypertension over the 5 years of  
11  
12 follow-up, while those on ART also had lower hypertensive risk than those HIV-negative at  
13  
14 baseline. Results for the full eligible sample are presented in online supplemental table 1.  
15  
16  
17  
18  
19  
20  
21

22 Table 3 shows the multivariable-adjusted results from the full Poisson regression excluding  
23  
24 HIV status for those completing both studies (see online supplemental table 2 for the full  
25  
26 eligible sample results). Older ages, being employed (IRR: 1.579 95% CI: 1.071-2.329), and  
27  
28 having a high waist circumference (IRR: 1.557 95% CI: 1.074-2.259) were associated with  
29  
30 higher risk of incident hypertension in 2015. Those engaging in high levels of physical  
31  
32 activity had an approximately 43% lower risk of incident hypertension, although the 95% CI  
33  
34 overlapped with the null value of 1 (95% CI: 0.319-1.018)  
35  
36  
37  
38  
39

40 Table 4 shows the same multivariable-adjusted Poisson model as Table 3 including HIV  
41  
42 status, with similar results to those risk factors from the model without HIV status. The  
43  
44 results for high waist circumference were in the same direction but the 95% CI overlapped  
45  
46 with the null value of 1, likely due to the reduced sample size. Those who were HIV-positive  
47  
48 and not on ART had an approximately 52% lower risk of incident hypertension compared to  
49  
50 those HIV-negative at baseline (95% CI 0.301-0.778), while those HIV-positive and on ART  
51  
52 showed similar associations to those not on ART.  
53  
54  
55  
56  
57  
58  
59  
60

1  
2  
3 Results of the sensitivity analyses of alternate anthropometry measures showed similar  
4 associations for BMI as for waist circumference (online supplemental table 3). There were  
5 not enough cases of high waist-to-hip ratio to include in the models. A model examining an  
6 outcome based only on BP thresholds also showed similar associations to the original models  
7 (online supplemental table 4). For the competing risk model, high rates of missingness on  
8 HIV/ART status precluded including that indicator. Results omitting HIV/ART status at  
9 baseline are presented in online supplemental table 5, showing similar results to the full  
10 eligible sample (online supplemental table 2). Cause of death information according to broad  
11 cause groups is presented in online supplemental table 6.

## 26 DISCUSSION

27  
28 In 1998, South Africa had approximately 6.3 million adults with hypertension.<sup>40</sup> Now it is  
29 estimated to be close to 12 million, nearly doubling despite population growth of about 34%  
30 over the same time period, with prevalence increasing from 24% to over 40% in some  
31 populations.<sup>41</sup> Based on our finding of 8.37 per 100 person-years, roughly 1.4 million adults  
32 over the age of 40 will develop hypertension over the next five years. Given an increase of  
33 nearly 50% in the risk of ischemic heart disease and stroke death for each 10 mmHg  
34 increase,<sup>42</sup> the results suggest a significant increase in the number of people required for  
35 additional treatment and premature mortality if not adequately controlled.

36  
37  
38 We found that 29% of older adults in our study developed hypertension over a five-year  
39 period. Our results were similar to another study from South Africa following individuals  
40 ages 30-plus who started with optimal blood pressure over five years (2005-2010). They  
41 found a relatively similar incidence of 24%<sup>27</sup> given the slightly younger age range.

1  
2  
3 We showed that men have higher hypertension incidence rates in mid-life, while women had  
4 higher rates in older ages. This is likely due at least in part to the smaller sample size of men  
5  
6 in our study. A potentially similar pattern was shown in a study in South Africa (2004-2016)  
7  
8 of patients initiating ART at 10 public sector clinics (9 urban, 1 rural) and including a wider  
9  
10 age range (ages 18-50-plus).<sup>24</sup> They found that men had higher hypertension incidence rates  
11  
12 at ages 18-39, while women had higher rates at ages 40-49 and 50-plus. Our finding may also  
13  
14 be due in part to greater employment for middle-aged men<sup>43</sup> and higher survival<sup>17 44</sup> or  
15  
16 obesity<sup>45 46</sup> among older women.  
17  
18  
19  
20  
21  
22  
23

24 In multivariable-adjusted models, we found that being employed and having a high waist  
25  
26 circumference at baseline were risk factors for incident hypertension. In another study in  
27  
28 South Africa, they also found that high waist circumference was a key risk factor, along with  
29  
30 alcohol intake.<sup>27</sup> While we showed no association with alcohol use, our sample also had low  
31  
32 self-reported use of alcohol, with 80% reporting not drinking in the past month, which may  
33  
34 be due in part to response bias.<sup>47</sup> Given the limited employment opportunities in our setting,<sup>28</sup>  
35  
36 a higher risk of hypertension amongst employed individuals may represent those more likely  
37  
38 to be exposed to workplace-related stress and other behavioural factors such as diet<sup>48 49</sup> that  
39  
40 may differ from those not employed.  
41  
42  
43  
44  
45  
46

47 We found that being HIV-positive at baseline was associated with a lower risk of incident  
48  
49 hypertension. This also aligns with an earlier study in South Africa that showed that being  
50  
51 HIV-positive was inversely related to increased BP.<sup>27</sup> However, our results may be sensitive  
52  
53 to survivorship bias if those who died due to HIV/AIDS over the five-year period were also  
54  
55 more likely to develop hypertension. Of the 71 individuals for which mortality information is  
56  
57 available, about 28% died due to HIV/AIDS or TB. If a substantial portion of those  
58  
59  
60

1  
2  
3 individuals developed hypertension this may affect our estimates of the association between  
4 HIV/ART status and risk of incident hypertension. Further, as we lacked information on  
5 HIV/ART status for many individuals in the eligible sample who did not complete the  
6 follow-up study, this may affect our estimates if those individuals were more likely to be  
7 HIV-positive.<sup>50</sup> A longer period of follow-up is needed to assess the effects of HIV and ART  
8 on hypertension and related cardiometabolic conditions. Longitudinal studies restricted to  
9 HIV-positive individuals have shown high hypertension incident rates over relatively short  
10 periods of follow-up and similar risk factors to the HIV-negative population.<sup>25 26</sup>  
11  
12  
13  
14  
15  
16  
17  
18  
19  
20  
21  
22  
23

24 Our longitudinal findings are particularly important given the complex health transition  
25 occurring in South Africa, with a concomitant burden of infectious and noncommunicable  
26 diseases.<sup>17 23 29 45</sup> A study from the same community as our study demonstrated a high and  
27 increasing burden of stroke morbidity and mortality.<sup>51</sup> While our findings are consistent with  
28 hypertension-related risk factors found in other regions, population-specific studies such as  
29 ours are important to contextualize the epidemiological findings from elsewhere and inform  
30 local prevention and treatment strategies.<sup>14</sup> They also provide an opportunity to understand  
31 the interaction between cardiometabolic and infectious diseases such as HIV. A longer period  
32 of follow-up, which will be possible as future waves of the study are completed, will permit a  
33 greater understanding of the interplay between hypertension, HIV, and treatment of both and  
34 related conditions.  
35  
36  
37  
38  
39  
40  
41  
42  
43  
44  
45  
46  
47  
48  
49  
50

51 We acknowledge our study limitations. While our study is one of the few population-based,  
52 longitudinal cohorts on hypertension incidence in Africa, the study comes from a defined  
53 region in rural northeast South Africa. Additional studies are needed in other settings,  
54 particularly given differences in exposures and differential risk factors in rural and urban  
55  
56  
57  
58  
59  
60



1  
2  
3 contexts. We include a wide range of potential risk factors based on existing studies. Other  
4 factors, however, such as migration history, would be important to consider given the high  
5 levels of circular labour migration in this setting and potential links of rural to urban  
6 migration to increased blood pressure.<sup>52–55</sup> Further, food insecurity is highly prevalent in this  
7 setting<sup>56</sup> and may lead to differential hypertension risk due to dietary differences. Given the  
8 high level of missingness on HIV/ART status amongst the eligible population who did not  
9 complete the follow-up study, we were unable to assess the effect of HIV/ART in a  
10 competing risk framework. Our measure of ART status is also based on self-report and may  
11 be subject to response bias, as well as factors related to HIV awareness such as engagement  
12 with health services.<sup>57</sup>

13  
14  
15  
16  
17  
18  
19  
20  
21  
22  
23  
24  
25  
26  
27  
28 Over a period of five years, 29% of individuals developed hypertension in a population-based  
29 cohort of individuals ages 40 and older given an incidence rate of 8.374 per 100 person-years.  
30 Abdominal obesity was one of the most consistent risk factors. Being employed was also a  
31 predictor of incident hypertension. As South Africa continues to undergo a complex health  
32 and epidemiological transition, continued longitudinal follow-up is needed to understand the  
33 complex interplay of noncommunicable and infectious diseases, along with their underlying  
34 and modifiable risk factors. In response to the urgent call for longitudinal sub-Saharan  
35 African studies, an increasing evidence base can help inform and target public health  
36 strategies to reduce preventable morbidity and mortality.

## Acknowledgements

The authors thank the study participants and all those involved in the successful field operations in Ha Nakekela, HAALSI and the Agincourt HDSS.

**Contributions:** BH wrote the first draft and designed and completed the statistical analyses. FXG, BH, TG and SMT conceptualized the work. FXG, NA, CWK, and SMT designed and implemented the baseline study. TG, FXG, CWK, and SMT designed and implemented the follow-up study. TG, NA, SAM, CWK, SMT, and FXG revised the manuscript for important intellectual content and contributed to interpretation of the data. All authors read and approved the final manuscript.

**Funding:** The Ha Nakekela study was supported by the National Institutes of Health [R24 AG032112-05] and the William and Flora Hewlett Foundation 2009-4060 African Population Research and Training Program. Data analysis for this study was funded by the US National Institute on Aging [R01 AG049634] and the University of Colorado, Innovative Seed Grant HIV after 40 in rural South Africa [not applicable].

HAALSI was supported by the U.S. National Institute on Aging [P01AG041710; 1R01AG051144-01; 3U54HG006938-03S1].

The MRC/Wits Rural Public Health and Health Transitions Research Unit and Agincourt Health and Socio-Demographic Surveillance System, a node of the South African Population Research Infrastructure Network (SAPRIN), is supported by the Department of Science and Innovation [not applicable], the University of the Witwatersrand [not applicable], and the

1  
2  
3 Medical Research Council, South Africa [not applicable], and previously the Wellcome  
4  
5 Trust, UK (Grants 058893/Z/99/A; 069683/Z/02/Z; 085477/Z/08/Z; 085477/B/08/Z).  
6  
7  
8  
9

10 **Competing interests:** None declared.  
11  
12  
13

14 **Ethics approval:** Ethical clearance for both surveys and the HDSS were obtained from the  
15 University of the Witwatersrand Human Research Ethics Committee (Medical) [M10458 and  
16 M141159] and the Mpumalanga Provincial Research and Ethics Committee. The baseline  
17 study also received ethical approval from the Institutional Review Board of the University of  
18 Colorado – Boulder [11-0549] and the follow-up study from the Harvard TH Chan School of  
19 Public Health, Office of Human Research Administration [C13-1608-02]. Written consent to  
20 participate was obtained for all participants in the baseline study. Each respondent in the  
21 follow-up study also provided written, informed consent (or by a proxy, when needed).  
22  
23  
24  
25  
26  
27  
28  
29  
30  
31  
32  
33  
34

35 **Data sharing:** The datasets generated and/or analysed for the follow-up study are available at  
36 the Harvard Center for Population and Development Studies (HCPDS) program website:  
37 [www.haalsi.org](http://www.haalsi.org). The data supporting the findings of this study are available from the  
38 corresponding author on reasonable request.  
39  
40  
41  
42  
43  
44  
45  
46  
47  
48  
49  
50  
51  
52  
53  
54  
55  
56  
57  
58  
59  
60

## REFERENCES

1. Lim, S. S., T. Vos, A. D. Flaxman, G. Danaei, K. Shibuya, H. Adair-Rohani, M. A. AlMazroa, M. Amann, H. R. Anderson, and K. G. Andrews. A comparative risk assessment of burden of disease and injury attributable to 67 risk factors and risk factor clusters in 21 regions, 1990-2010: a systematic analysis for the Global Burden of Disease Study 2010. *The Lancet* 2013;380:2224-2260.
2. Ibrahim, M. M., and A. Damasceno. Hypertension in developing countries. *The Lancet* 2012;380:611-619.
3. Bosu, W. K., S. T. Reilly, J. M. K. Aheto, and E. Zucchelli. Hypertension in older adults in Africa: A systematic review and meta-analysis. *PloS One* 2019;14:e0214934.
4. Guwatudde, D., J. Nankya-Mutyoba, R. Kalyesubula, C. Laurence, C. Adebamowo, I. Ajayi, F. Bajunirwe, M. Njelekela, F. S. Chiwanga, T. Reid, J. Volmink, H. O. Adami, M. D. Holmes, and S. Dalal. The burden of hypertension in sub-Saharan Africa: a four-country cross sectional study. *BMC Public Health* 2015;15:1211.
5. Kaze, A. D., A. E. Schutte, S. Erqou, A. P. Kengne, and J. B. Echouffo-Tcheugui. Prevalence of hypertension in older people in Africa. *Journal of Hypertension* 2017;35:1345-1352.
6. Sarki, A. M., C. U. Nduka, S. Stranges, N. B. Kandala, and O. A. Uthman. Prevalence of Hypertension in Low- and Middle-Income Countries: A Systematic Review and Meta-Analysis. *Medicine* 2015;94:e1959.
7. Twagirumukiza, M., D. De Bacquer, J. G. Kips, G. de Backer, R. V. Stichele, and L. M. Van Bortel. Current and projected prevalence of arterial hypertension in sub-Saharan Africa by sex, age and habitat: an estimate from population studies. *J Hypertens* 2011;29:1243-1252.
8. Lloyd-Sherlock, P., J. Beard, N. Minicuci, S. Ebrahim, and S. Chatterji. Hypertension among older adults in low- and middle-income countries: prevalence, awareness and control. *International Journal of Epidemiology* 2014;43:116-128.
9. Sudharsanan, N., and P. Geldsetzer. Impact of Coming Demographic Changes on the Number of Adults in Need of Care for Hypertension in Brazil, China, India, Indonesia, Mexico, and South Africa. *Hypertension* 2019;73:770-776.
10. Addo, J., L. Smeeth, and D. A. Leon. Hypertension in sub-saharan Africa: a systematic review. *Hypertension* 2007;50:1012-1018.
11. Gómez-Olivé, F. X., S. A. Ali, F. Made, C. Kyobutungi, E. Nonterah, L. Micklesfield, M. Alberts, and R. Boua. Stark Regional and Sex Differences in the Prevalence and Awareness of Hypertension: An H3Africa AWI-Gen Study Across 6 Sites in Sub-Saharan Africa. *Global Heart* 2017
12. Ataklte, F., S. Erqou, S. Kaptoge, B. Taye, J. B. Echouffo-Tcheugui, and A. P. Kengne. Burden of undiagnosed hypertension in sub-saharan Africa: a systematic review and meta-analysis. *Hypertension* 2015;65:291-298.
13. Jardim, T. V., S. Reiger, S. Abrahams-Gessel, F. X. Gomez-Olive, R. G. Wagner, A. Wade, T. W. Barnighausen, J. Salomon, S. Tollman, and T. A. Gaziano. Hypertension management in a population of older adults in rural South Africa. *Journal of Hypertension* 2017;35:1283-1289.
14. Kengne, A. P., L. M. Ntyintyane, and B. M. Mayosi. A systematic overview of prospective cohort studies of cardiovascular disease in sub-Saharan Africa. *Cardiovascular Journal of Africa* 2012;23:103-112.

15. Holmes, M. D., S. Dalal, J. Volmink, C. A. Adebamowo, M. Njelekela, W. W. Fawzi, W. C. Willett, and H. O. Adami. Non-communicable diseases in sub-Saharan Africa: the case for cohort studies. *PLoS Med* 2010;7:e1000244.
16. Herbst, A. J., G. S. Cooke, T. Bärnighausen, A. KanyKany, F. Tanser, and M. Newell. Adult mortality and antiretroviral treatment roll-out in rural KwaZulu-Natal, South Africa. *Bulletin of the World Health Organization* 2009;87:754-762.
17. Kabudula, C. W., B. Houle, M. A. Collinson, K. Kahn, F. X. Gómez-Olivé, S. J. Clark, and S. Tollman. Progression of the epidemiological transition in a rural South African setting: findings from population surveillance in Agincourt, 1993-2013. *BMC Public Health* 2017;17:424.
18. Vollmer, S., K. Harttgen, T. Alfvén, J. Padayachy, P. Ghys, and T. Bärnighausen. The HIV epidemic in sub-Saharan Africa is aging: Evidence from the Demographic and Health Surveys in sub-Saharan Africa. *AIDS Behav* 2016;21:101-113.
19. Anand, A. R., G. Rachel, and D. Parthasarathy. HIV proteins and endothelial dysfunction: Implications in cardiovascular disease. *Front Cardiovasc Med* 2018;5:185.
20. Grinspoon, S., and A. Carr. Cardiovascular risk and body-fat abnormalities in HIV-infected adults. *New England Journal of Medicine* 2005;352:48-62.
21. Dillon, D. G. Association of HIV and ART with cardiometabolic traits in sub-Saharan Africa: a systematic review and meta-analysis. *International Journal of Epidemiology* 2013;42:1754-1771.
22. Rigaud, A.-S., and B. Forette. Hypertension in older adults. *Journal of Gerontology* 2001;56A:M217-M225.
23. Mayosi, B. M., A. J. Flisher, U. G. Lalloo, F. Sitas, S. M. Tollman, and D. Bradshaw. The burden of non-communicable diseases in South Africa. *Lancet* 2009;374:934-947.
24. Brennan, A. T., L. Jamieson, N. J. Crowther, M. P. Fox, J. A. George, K. M. Berry, A. Stokes, M. Maskew, I. Sanne, and L. Long. Prevalence, incidence, predictors, treatment, and control of hypertension among HIV-positive adults on antiretroviral treatment in public sector treatment programs in South Africa. *PloS One* 2018;13:e0204020.
25. Okello, S., M. Kanyesigye, W. R. Muyindike, B. H. Annex, P. W. Hunt, S. Haneuse, and M. J. Siedner. Incidence and predictors of hypertension in adults with HIV-initiating antiretroviral therapy in south-western Uganda. *J Hypertens* 2015;33:2039-2045.
26. Rodriguez-Arbolí, E., K. Mwamelo, A. V. Kalinjuma, H. Furrer, C. Hatz, M. Tanner, M. Battegay, E. Letang, and S. G. KIULARCO. Incidence and risk factors for hypertension among HIV patients in rural Tanzania - A prospective cohort study. *PLoS One* 2017;12:e0172089.
27. Schutte, A. E., R. Schutte, H. W. Huisman, J. M. van Rooyen, C. M. Fourie, N. T. Malan, L. Malan, C. M. Mels, W. Smith, S. J. Moss, G. W. Towers, H. S. Kruger, E. Wentzel-Viljoen, H. H. Vorster, and A. Kruger. Are behavioural risk factors to be blamed for the conversion from optimal blood pressure to hypertensive status in Black South Africans? A 5-year prospective study. *International Journal of Epidemiology* 2012;41:1114-1123.
28. Kahn, K., M. A. Collinson, F. X. Gomez-Olive, O. Mokoena, R. Twine, P. Mee, S. A. Afolabi, B. D. Clark, C. W. Kabudula, A. Khosa, S. Khoza, M. G. Shabangu, B. Silaule, J. B. Tibane, R. G. Wagner, M. L. Garenne, S. J. Clark, and S. M. Tollman. Profile: Agincourt Health and Socio-demographic Surveillance System. *Int J Epidemiol* 2012;41:988-1001.

- 1
  - 2
  - 3
  - 4
  - 5
  - 6
  - 7
  - 8
  - 9
  - 10
  - 11
  - 12
  - 13
  - 14
  - 15
  - 16
  - 17
  - 18
  - 19
  - 20
  - 21
  - 22
  - 23
  - 24
  - 25
  - 26
  - 27
  - 28
  - 29
  - 30
  - 31
  - 32
  - 33
  - 34
  - 35
  - 36
  - 37
  - 38
  - 39
  - 40
  - 41
  - 42
  - 43
  - 44
  - 45
  - 46
  - 47
  - 48
  - 49
  - 50
  - 51
  - 52
  - 53
  - 54
  - 55
  - 56
  - 57
  - 58
  - 59
  - 60
29. Gómez-Olivé, F. X., N. Angotti, B. Houle, K. Klipstein-Grobusch, C. Kabudula, J. Menken, J. Williams, S. Tollman, and S. J. Clark. Prevalence of HIV among those 15 and older in rural South Africa. *AIDS Care* 2013;25:1122-1128.
30. Gómez-Olivé, F. X., L. Montana, R. G. Wagner, C. W. Kabudula, J. K. Rohr, K. Kahn, T. Bärnighausen, M. Collinson, D. Canning, T. Gaziano, J. A. Salomon, C. F. Payne, A. Wade, S. M. Tollman, and L. Berkman. Cohort Profile: Health and Ageing in Africa: a Longitudinal Study of an INDEPTH Community in South Africa (HAALSI). *International Journal of Epidemiology* 2018;47:689-690j.
31. Altunkan, S., K. Öztas, and E. Altunkan. Validation of the Omron 637IT wrist blood pressure measuring device with a position sensor according to the International Protocol in adults and obese adults. *Blood Pressure Monitoring* 2006;11:79-85.
32. Saladini, F., E. Benetti, and P. Palatini. Accuracy of the visomat handy wrist blood pressure measuring device according to the International Protocol. *Blood Press Monit* 2010;15:281-284.
33. Omboni, S., I. Riva, A. Giglio, G. Caldara, A. Gropelli, and G. Parati. Validation of the Omron M5-I, R5-I and HEM-907 automated blood pressure monitors in elderly individuals according to the International Protocol of the European Society of Hypertension. *Blood Pressure Monitoring* 2007;12:233-242.
34. Centers for Disease Control and Prevention (CDC). National Health and Nutrition Examination Survey: 1999-2000 Data Documentation, Codebook, and Frequencies. 2002
35. US Department of Health and Human Services. 2004. *The seventh report of the Joint National Committee on prevention, detection, evaluation, and treatment of high blood pressure*. National Heart, Lung, and Blood Institute (US),
36. Kabudula, C., B. Houle, M. A. Collinson, K. Kahn, S. Tollman, and S. Clark. Assessing changes in household socioeconomic status in rural South Africa, 2001-2013: a distributional analysis using household asset indicators. *Social Indicators Research* 2016;133:1047-1073.
37. Byass, P., D. Chandramohan, S. J. Clark, L. D'Ambruoso, E. Fottrell, W. J. Graham, A. J. Herbst, A. Hodgson, S. Hounton, K. Kahn, A. Krishnan, J. Leitao, F. Odhiambo, O. A. Sankoh, and S. M. Tollman. Strengthening standardised interpretation of verbal autopsy data: the new InterVA-4 tool. *Glob Health Action* 2012;5:1-8.
38. StataCorp. 2017. *Stata Statistical Software: Release 15*. StataCorp, LP, College Station, TX.
39. Fine, J. P., and R. J. Gray. A Proportional Hazards Model for the Subdistribution of a Competing Risk. *Journal of the American Statistical Association* 1999;94:496-509.
40. Steyn, K., T. A. Gaziano, D. Bradshaw, R. Laubscher, and J. Fourie. Hypertension in South African adults: results from the Demographic and Health Survey, 1998. *Journal of Hypertension* 2001;19:1717-1725.
41. Ntuli, S. T., E. Maimela, M. Alberts, S. Choma, and S. Dikotope. Prevalence and associated risk factors of hypertension amongst adults in a rural community of Limpopo Province, South Africa. *Afr J Prim Health Care Fam Med* 2015;7:847.
42. Chobanian, A. V., G. L. Bakris, H. R. Black, W. C. Cushman, L. A. Green, J. L. Izzo Jr, D. W. Jones, B. J. Materson, S. Oparil, and J. T. Wright Jr. The seventh report of the joint national committee on prevention, detection, evaluation, and treatment of high blood pressure: the JNC 7 report. *JAMA* 2003;289:2560-2571.
43. Blalock, C. L. Labor migration and employment in post-apartheid rural South Africa. *Department of Sociology* 2014;Doctor of Philosophy



- 1
- 2
- 3
- 4 44. Houle, B., S. J. Clark, F. X. Gómez-Olivé, K. Kahn, and S. M. Tollman. The unfolding
- 5 counter-transition in rural South Africa: mortality and cause of death, 1994-2009. *PLoS*
- 6 *One* 2014;9:e100420.
- 7 45. Clark, S. J., F. X. Gómez-Olivé, B. Houle, M. Thorogood, K. Klipstein-Grobusch, N.
- 8 Angotti, C. Kabudula, J. Williams, J. Menken, and S. Tollman. Cardiometabolic disease
- 9 risk and HIV status in rural South Africa: establishing a baseline. *BMC Public Health*
- 10 2015;15:372.
- 11 46. Gaziano, T. A., S. Abrahams-Gessel, F. X. Gomez-Olive, A. Wade, N. J. Crowther, S.
- 12 Alam, J. Manne-Goehler, C. W. Kabudula, R. Wagner, J. Rohr, L. Montana, K. Kahn,
- 13 T. W. Bärnighausen, L. F. Berkman, and S. Tollman. Cardiometabolic risk in a
- 14 population of older adults with multiple co-morbidities in rural south africa: the
- 15 HAALSI (Health and Aging in Africa: longitudinal studies of INDEPTH communities)
- 16 study. *BMC Public Health* 2017;17:206.
- 17 47. Houle, B., N. Angotti, F. X. Gómez-Olivé, and S. J. Clark. Fieldworker effects on
- 18 substance use reporting in rural South Africa. *International Journal of Alcohol and*
- 19 *Drug Research* 2018;7:29-39.
- 20 48. Maredza, M., K. J. Hofman, and T. Tollman. A hidden menace: cardiovascular disease
- 21 in South Africa and the costs of an inadequate policy response: health policy and
- 22 cardiovascular disease. *SA Heart* 2011;8:48-57.
- 23 49. Feeley, A. B. B., K. Kahn, R. Twine, and S. A. Norris. Exploratory survey of informal
- 24 vendor-sold fast food in rural South Africa. *South African Journal of Clinical Nutrition*
- 25 2011;24:199-201.
- 26 50. Clark, S. J., and B. Houle. Validation, replication, and sensitivity testing of Heckman-
- 27 type selection models to adjust estimates of HIV prevalence. *PLoS One*
- 28 2014;9:e112563.
- 29 51. Maredza, M., M. Y. Bertram, and S. M. Tollman. Disease burden of stroke in rural
- 30 South Africa: an estimate of incidence, mortality and disability adjusted life years. *BMC*
- 31 *Neurol* 2015;15:54.
- 32 52. Collinson, M. A., M. J. White, P. Bocquier, S. T. McGarvey, S. A. Afolabi, S. J. Clark,
- 33 K. Kahn, and S. M. Tollman. Migration and the epidemiological transition: insights
- 34 from the Agincourt sub-district of northeast South Africa. *Global Health Action*
- 35 2014;7:23514.
- 36 53. Pheiffer, C. F., S. T. McGarvey, C. Ginsburg, M. Collinson, F. X. Gómez-Olivé, S.
- 37 Tollman, and M. J. White. Dimensions of internal migration and their relationship to
- 38 blood pressure in South Africa. *J Biosoc Sci* 2019:1-16.
- 39 54. Poulter, N. R., K. T. Khaw, B. E. Hopwood, M. Mugambi, W. S. Peart, G. Rose, and P.
- 40 S. Sever. The Kenyan Luo migration study: observations on the initiation of a rise in
- 41 blood pressure. *BMJ* 1990;300:967-972.
- 42 55. Steyn, K., D. Bradshaw, R. Norman, and R. Laubscher. Determinants and treatment of
- 43 hypertension in South Africans: the first Demographic and Health Survey. *South*
- 44 *African Medical Journal* 2008;98:376-380.
- 45 56. Hunter, L. M., W. Twine, and L. Patterson. "Locusts are now our beef": adult mortality
- 46 and household dietary use of local environmental resources in rural South Africa. *Scand*
- 47 *J Public Health Suppl* 2007;69:165-174.
- 48 57. Manne-Goehler, J., L. Montana, F. X. Gómez-Olivé, J. Rohr, G. Harling, R. G. Wagner,
- 49 A. Wade, C. W. Kabudula, P. Geldsetzer, K. Kahn, S. Tollman, L. F. Berkman, T. W.
- 50 Bärnighausen, and T. A. Gaziano. The ART advantage: healthcare utilization for
- 51 diabetes and hypertension in rural South Africa. *JAIDS Journal of Acquired Immune*
- 52 *Deficiency Syndromes* 2017;75:561-567.
- 53
- 54
- 55
- 56
- 57
- 58
- 59
- 60

1  
2  
3 **FIGURE CAPTIONS**  
4

5 **Figure 1.** Participant flowchart.  
6

7  
8 **Figure 2.** Proportion of participants with incident hypertension, by age and gender, 2015.  
9  
10  
11  
12  
13  
14  
15  
16  
17  
18  
19  
20  
21  
22  
23  
24  
25  
26  
27  
28  
29  
30  
31  
32  
33  
34  
35  
36  
37  
38  
39  
40  
41  
42  
43  
44  
45  
46  
47  
48  
49  
50  
51  
52  
53  
54  
55  
56  
57  
58  
59  
60

For peer review only



**Table 1.** Sample characteristics at baseline (2010), by study participation in 2015 for eligible individuals (n=977).

|                                      | Lost to follow-up (n=301) |        | Completed 2015 (n=676) |        | p-value | Total (n=977) |        |
|--------------------------------------|---------------------------|--------|------------------------|--------|---------|---------------|--------|
|                                      | n                         | %      | n                      | %      |         | n             | %      |
| <b>Gender</b>                        |                           |        |                        |        |         |               |        |
| Male                                 | 140                       | (46.5) | 239                    | (35.4) | 0.001   | 379           | (38.8) |
| Female                               | 161                       | (53.5) | 437                    | (64.6) |         | 598           | (61.2) |
| <b>Age groups</b>                    |                           |        |                        |        |         |               |        |
| 35-44                                | 130                       | (43.2) | 227                    | (33.6) | 0.003   | 357           | (36.5) |
| 45-54                                | 71                        | (23.6) | 180                    | (26.6) |         | 251           | (25.7) |
| 55-64                                | 34                        | (11.3) | 126                    | (18.6) |         | 160           | (16.4) |
| 65-74                                | 29                        | (9.6)  | 81                     | (12.0) |         | 110           | (11.3) |
| 75+                                  | 37                        | (12.3) | 62                     | (9.2)  |         | 99            | (10.1) |
| <b>Education</b>                     |                           |        |                        |        |         |               |        |
| None                                 | 40                        | (34.2) | 277                    | (41.0) | 0.018   | 317           | (40.0) |
| Less than secondary                  | 54                        | (46.2) | 327                    | (48.4) |         | 381           | (48.0) |
| Secondary or more                    | 23                        | (19.7) | 72                     | (10.7) |         | 95            | (12.0) |
| <b>Union status</b>                  |                           |        |                        |        |         |               |        |
| Not in union                         | 166                       | (55.1) | 302                    | (44.7) | 0.002   | 468           | (47.9) |
| Formal/informal union                | 135                       | (44.9) | 374                    | (55.3) |         | 509           | (52.1) |
| <b>SES<sup>a</sup></b>               |                           |        |                        |        |         |               |        |
| Low                                  | 130                       | (43.2) | 253                    | (37.7) | 0.258   | 383           | (39.4) |
| Middle                               | 86                        | (28.6) | 216                    | (32.2) |         | 302           | (31.1) |
| High                                 | 85                        | (28.2) | 202                    | (30.1) |         | 287           | (29.5) |
| <b>Employment status</b>             |                           |        |                        |        |         |               |        |
| Not employed                         | 80                        | (68.4) | 498                    | (74.1) | 0.196   | 578           | (73.3) |
| Employed                             | 37                        | (31.6) | 174                    | (25.9) |         | 211           | (26.7) |
| <b>Smoking history</b>               |                           |        |                        |        |         |               |        |
| Never                                | 236                       | (78.4) | 548                    | (81.1) | 0.206   | 784           | (80.2) |
| Prior                                | 18                        | (6.0)  | 49                     | (7.2)  |         | 67            | (6.9)  |
| Current                              | 47                        | (15.6) | 79                     | (11.7) |         | 126           | (12.9) |
| <b>Alcohol use</b>                   |                           |        |                        |        |         |               |        |
| Not in past 30 days                  | 235                       | (78.1) | 544                    | (80.5) | 0.686   | 779           | (79.7) |
| Less than weekly                     | 24                        | (8.0)  | 47                     | (7.0)  |         | 71            | (7.3)  |
| Weekly                               | 42                        | (14.0) | 85                     | (12.6) |         | 127           | (13.0) |
| <b>Physical activity<sup>b</sup></b> |                           |        |                        |        |         |               |        |
| Low                                  | 27                        | (9.4)  | 40                     | (6.0)  | 0.128   | 67            | (7.0)  |

|                                       |     |        |     |        |       |            |
|---------------------------------------|-----|--------|-----|--------|-------|------------|
| Moderate                              | 80  | (27.9) | 209 | (31.3) | 289   | (30.3)     |
| High                                  | 180 | (62.7) | 419 | (62.7) | 599   | (62.7)     |
| High waist circumference <sup>c</sup> |     |        |     |        |       |            |
| No                                    | 205 | (72.7) | 430 | (65.8) | 0.04  | 635 (67.9) |
| Yes                                   | 77  | (27.3) | 223 | (34.2) |       | 300 (32.1) |
| Diabetes <sup>d</sup>                 |     |        |     |        |       |            |
| No                                    | 293 | (98.0) | 655 | (97.2) | 0.46  | 948 (97.4) |
| Yes                                   | 6   | (2.0)  | 19  | (2.8)  |       | 25 (2.6)   |
| High triglycerides <sup>e</sup>       |     |        |     |        |       |            |
| No                                    | 213 | (72.7) | 479 | (73.5) | 0.805 | 692 (73.2) |
| Yes                                   | 80  | (27.3) | 173 | (26.5) |       | 253 (26.8) |

HIV/ART is not included given missing values (n=297) for the vast majority of those lost to follow-up.

<sup>a</sup> Based on a household asset index score.

<sup>b</sup> Based on the International Physical Activity Questionnaire (IPAQ).

<sup>c</sup> Greater than 102cm for men and 88cm for women.

<sup>d</sup> Blood glucose greater than or equal to 11.1.

<sup>e</sup> Greater than or equal to 1.7 mmol/l.

**Table 2.** Hypertension incidence rates and incidence rate ratios per 100 person-years over 5 years of follow-up (2010-2015), by sociodemographic, health and behavioural factors among those completing both time points.

| Value                          | Events | PYRS | IR     | 95% CI |        | IRR   | 95% CI |       | p-value |
|--------------------------------|--------|------|--------|--------|--------|-------|--------|-------|---------|
|                                |        |      |        | Lower  | Upper  |       | Lower  | Upper |         |
| Overall                        | 193    | 2311 | 8.374  | 7.242  | 9.721  |       |        |       |         |
| Gender                         |        |      |        |        |        |       |        |       |         |
| Male                           | 74     | 815  | 9.097  | 7.266  | 11.496 | 1     |        |       |         |
| Female                         | 119    | 1496 | 8.159  | 6.832  | 9.804  | 0.897 | 0.67   | 1.2   | 0.463   |
| Age groups                     |        |      |        |        |        |       |        |       |         |
| 40-49                          | 56     | 975  | 5.04   | 3.837  | 6.73   | 1     |        |       |         |
| 50-59                          | 47     | 556  | 8.897  | 6.667  | 12.077 | 1.765 | 1.177  | 2.647 | 0.006   |
| 60-69                          | 42     | 399  | 11.104 | 8.282  | 15.14  | 2.203 | 1.464  | 3.315 | <0.001  |
| 70-79                          | 28     | 239  | 11.875 | 8.285  | 17.436 | 2.356 | 1.486  | 3.735 | <0.001  |
| 80+                            | 20     | 141  | 16.197 | 10.647 | 25.379 | 3.213 | 1.931  | 5.348 | <0.001  |
| Education                      |        |      |        |        |        |       |        |       |         |
| None                           | 85     | 986  | 9.256  | 7.491  | 11.536 | 1     |        |       |         |
| Less than secondary            | 92     | 1090 | 8.21   | 6.645  | 10.229 | 0.887 | 0.655  | 1.202 | 0.439   |
| Secondary or more              | 16     | 235  | 5.318  | 3.112  | 9.652  | 0.575 | 0.319  | 1.034 | 0.065   |
| Union status                   |        |      |        |        |        |       |        |       |         |
| Not in union                   | 91     | 1034 | 8.613  | 6.983  | 10.709 | 1     |        |       |         |
| Formal/informal union          | 102    | 1277 | 8.165  | 6.685  | 10.051 | 0.948 | 0.706  | 1.273 | 0.722   |
| SES <sup>a</sup>               |        |      |        |        |        |       |        |       |         |
| Low                            | 68     | 867  | 8.064  | 6.328  | 10.397 | 1     |        |       |         |
| Middle                         | 64     | 736  | 8.715  | 6.798  | 11.305 | 1.081 | 0.759  | 1.539 | 0.667   |
| High                           | 60     | 689  | 8.389  | 6.449  | 11.056 | 1.04  | 0.723  | 1.497 | 0.831   |
| Employment status              |        |      |        |        |        |       |        |       |         |
| Not employed                   | 144    | 1701 | 8.336  | 7.048  | 9.911  | 1     |        |       |         |
| Employed                       | 48     | 595  | 8.511  | 6.375  | 11.557 | 1.021 | 0.726  | 1.435 | 0.905   |
| Smoking history                |        |      |        |        |        |       |        |       |         |
| Never                          | 163    | 1861 | 8.644  | 7.392  | 10.155 | 1     |        |       |         |
| Prior                          | 11     | 171  | 6.356  | 3.501  | 12.447 | 0.735 | 0.391  | 1.381 | 0.339   |
| Current                        | 19     | 279  | 6.715  | 4.293  | 10.956 | 0.777 | 0.478  | 1.262 | 0.308   |
| Alcohol use                    |        |      |        |        |        |       |        |       |         |
| Not in past 30 days            | 153    | 1852 | 8.416  | 7.167  | 9.931  | 1     |        |       |         |
| Less than weekly               | 10     | 167  | 5.459  | 2.879  | 11.284 | 0.649 | 0.331  | 1.272 | 0.208   |
| Weekly                         | 30     | 292  | 9.789  | 6.708  | 14.649 | 1.163 | 0.766  | 1.765 | 0.478   |
| Physical activity <sup>b</sup> |        |      |        |        |        |       |        |       |         |

|    |                            |     |      |        |       |        |       |       |       |       |
|----|----------------------------|-----|------|--------|-------|--------|-------|-------|-------|-------|
| 1  |                            |     |      |        |       |        |       |       |       |       |
| 2  |                            |     |      |        |       |        |       |       |       |       |
| 3  | Low                        | 20  | 122  | 15.468 | 9.85  | 24.91  | 1     |       |       |       |
| 4  | Moderate                   | 71  | 687  | 10.641 | 8.402 | 13.61  | 0.688 | 0.412 | 1.149 | 0.153 |
| 5  | High                       | 100 | 1471 | 6.98   | 5.718 | 8.59   | 0.451 | 0.275 | 0.742 | 0.002 |
| 6  | High waist                 |     |      |        |       |        |       |       |       |       |
| 7  | circumference <sup>c</sup> |     |      |        |       |        |       |       |       |       |
| 8  | No                         | 104 | 1512 | 6.519  | 5.326 | 8.046  | 1     |       |       |       |
| 9  | Yes                        | 78  | 735  | 10.571 | 8.483 | 13.283 | 1.621 | 1.197 | 2.196 | 0.002 |
| 10 | Diabetes <sup>d</sup>      |     |      |        |       |        |       |       |       |       |
| 11 | No                         | 186 | 2240 | 8.298  | 7.156 | 9.662  | 1     |       |       |       |
| 12 | Yes                        | 6   | 64   | 10.06  | 4.451 | 26.006 | 1.212 | 0.529 | 2.778 | 0.649 |
| 13 | High                       |     |      |        |       |        |       |       |       |       |
| 14 | triglycerides <sup>e</sup> |     |      |        |       |        |       |       |       |       |
| 15 | No                         | 122 | 1660 | 7.262  | 6.049 | 8.775  | 1     |       |       |       |
| 16 | Yes                        | 59  | 575  | 10.59  | 8.177 | 13.88  | 1.458 | 1.057 | 2.012 | 0.022 |
| 17 | HIV and ART                |     |      |        |       |        |       |       |       |       |
| 18 | status                     |     |      |        |       |        |       |       |       |       |
| 19 | Negative                   | 155 | 1514 | 10.452 | 8.909 | 12.318 | 1     |       |       |       |
| 20 | Positive, not on           |     |      |        |       |        |       |       |       |       |
| 21 | ART                        | 25  | 486  | 4.749  | 3.15  | 7.439  | 0.454 | 0.289 | 0.713 | 0.001 |
| 22 | Positive, on               |     |      |        |       |        |       |       |       |       |
| 23 | ART                        | 6   | 178  | 3.553  | 1.52  | 10.122 | 0.34  | 0.142 | 0.811 | 0.015 |

<sup>a</sup> Based on a household asset index score.

<sup>b</sup> Based on the International Physical Activity Questionnaire (IPAQ).

<sup>c</sup> Greater than 102cm for men and 88cm for women.

<sup>d</sup> Blood glucose greater than or equal to 11.1.

<sup>e</sup> Greater than or equal to 1.7 mmol/l.

**Table 3.** Multivariable Poisson regression of incident hypertension on sociodemographic, health and behavioural risk factors among those completing both time points (n=616).

|                                | IRR   | 95% CI |       | p-value |
|--------------------------------|-------|--------|-------|---------|
|                                |       | Lower  | Upper |         |
| Gender                         |       |        |       |         |
| Male                           | 1     |        |       |         |
| Female                         | 0.818 | 0.512  | 1.305 | 0.399   |
| Age groups                     |       |        |       |         |
| 40-49                          | 1     |        |       |         |
| 50-59                          | 1.831 | 1.193  | 2.811 | 0.006   |
| 60-69                          | 2.4   | 1.463  | 3.938 | <0.001  |
| 70-79                          | 2.607 | 1.451  | 4.684 | <0.001  |
| 80+                            | 2.561 | 1.196  | 5.488 | <0.001  |
| Education                      |       |        |       |         |
| None                           | 1     |        |       |         |
| Less than secondary            | 1.061 | 0.732  | 1.537 | 0.755   |
| Secondary or more              | 0.741 | 0.372  | 1.478 | 0.395   |
| Union status                   |       |        |       |         |
| Not in union                   | 1     |        |       |         |
| Formal/informal union          | 1.023 | 0.724  | 1.445 | 0.899   |
| SES <sup>a</sup>               |       |        |       |         |
| Low                            | 1     |        |       |         |
| Middle                         | 1.068 | 0.715  | 1.593 | 0.749   |
| High                           | 0.915 | 0.59   | 1.42  | 0.693   |
| Employment status              |       |        |       |         |
| Not employed                   | 1     |        |       |         |
| Employed                       | 1.579 | 1.071  | 2.329 | 0.021   |
| Smoking history                |       |        |       |         |
| Never                          | 1     |        |       |         |
| Prior                          | 0.758 | 0.37   | 1.55  | 0.447   |
| Current                        | 0.709 | 0.373  | 1.349 | 0.295   |
| Alcohol use                    |       |        |       |         |
| Not in past 30 days            | 1     |        |       |         |
| Less than weekly               | 0.717 | 0.345  | 1.492 | 0.373   |
| Weekly                         | 1.07  | 0.652  | 1.755 | 0.789   |
| Physical activity <sup>b</sup> |       |        |       |         |
| Low                            | 1     |        |       |         |
| Moderate                       | 0.781 | 0.447  | 1.364 | 0.385   |

|                                       |       |       |       |       |
|---------------------------------------|-------|-------|-------|-------|
| High waist circumference <sup>c</sup> | 0.57  | 0.319 | 1.018 | 0.057 |
| No                                    | 1     |       |       |       |
| Yes                                   | 1.557 | 1.074 | 2.259 | 0.02  |
| Diabetes <sup>d</sup>                 |       |       |       |       |
| No                                    | 1     |       |       |       |
| Yes                                   | 0.932 | 0.399 | 2.178 | 0.87  |
| High triglycerides <sup>e</sup>       |       |       |       |       |
| No                                    | 1     |       |       |       |
| Yes                                   | 1.297 | 0.932 | 1.805 | 0.123 |

<sup>a</sup> Based on a household asset index score.

<sup>b</sup> Based on the International Physical Activity Questionnaire (IPAQ).

<sup>c</sup> Greater than 102cm for men and 88cm for women.

<sup>d</sup> Blood glucose greater than or equal to 11.1.

<sup>e</sup> Greater than or equal to 1.7 mmol/l.

**Table 4.** Multivariable Poisson regression of incident hypertension on sociodemographic, health and behavioural risk factors, and HIV and ART status among those completing both time points (n=581).

|                                | IRR   | 95% CI |       | p-value |
|--------------------------------|-------|--------|-------|---------|
|                                |       | Lower  | Upper |         |
| Gender                         |       |        |       |         |
| Male                           | 1     |        |       |         |
| Female                         | 0.854 | 0.533  | 1.369 | 0.512   |
| Age groups                     |       |        |       |         |
| 40-49                          | 1     |        |       |         |
| 50-59                          | 1.846 | 1.183  | 2.879 | 0.007   |
| 60-69                          | 2.128 | 1.281  | 3.535 | 0.004   |
| 70-79                          | 2.339 | 1.256  | 4.356 | 0.007   |
| 80+                            | 2.139 | 0.978  | 4.676 | 0.057   |
| Education                      |       |        |       |         |
| None                           | 1     |        |       |         |
| Less than secondary            | 1.124 | 0.765  | 1.652 | 0.552   |
| Secondary or more              | 0.754 | 0.368  | 1.542 | 0.439   |
| Union status                   |       |        |       |         |
| Not in union                   | 1     |        |       |         |
| In union                       | 0.939 | 0.662  | 1.332 | 0.724   |
| SES <sup>a</sup>               |       |        |       |         |
| Low                            | 1     |        |       |         |
| Middle                         | 0.97  | 0.647  | 1.454 | 0.883   |
| High                           | 0.812 | 0.519  | 1.269 | 0.36    |
| Employment status              |       |        |       |         |
| Not employed                   | 1     |        |       |         |
| Employed                       | 1.604 | 1.064  | 2.419 | 0.024   |
| Smoking history                |       |        |       |         |
| Never                          | 1     |        |       |         |
| Prior                          | 0.727 | 0.34   | 1.554 | 0.411   |
| Current                        | 0.661 | 0.345  | 1.267 | 0.213   |
| Alcohol use                    |       |        |       |         |
| Not in past 30 days            | 1     |        |       |         |
| Less than weekly               | 0.751 | 0.358  | 1.574 | 0.448   |
| Weekly                         | 1.111 | 0.668  | 1.846 | 0.685   |
| Physical activity <sup>b</sup> |       |        |       |         |
| Low                            | 1     |        |       |         |
| Moderate                       | 0.77  | 0.434  | 1.365 | 0.371   |

|                                       |       |       |       |       |
|---------------------------------------|-------|-------|-------|-------|
| High waist circumference <sup>c</sup> | 0.56  | 0.309 | 1.015 | 0.056 |
| No                                    | 1     |       |       |       |
| Yes                                   | 1.448 | 0.975 | 2.149 | 0.066 |
| Diabetes <sup>d</sup>                 |       |       |       |       |
| No                                    | 1     |       |       |       |
| Yes                                   | 0.907 | 0.392 | 2.102 | 0.82  |
| High triglycerides <sup>e</sup>       |       |       |       |       |
| No                                    | 1     |       |       |       |
| Yes                                   | 1.34  | 0.956 | 1.877 | 0.089 |
| HIV and ART status                    |       |       |       |       |
| Negative                              | 1     |       |       |       |
| Positive, not on ART                  | 0.484 | 0.301 | 0.778 | 0.003 |
| Positive, on ART                      | 0.462 | 0.197 | 1.082 | 0.075 |

<sup>a</sup> Based on a household asset index score.

<sup>b</sup> Based on the International Physical Activity Questionnaire (IPAQ).

<sup>c</sup> Greater than 102cm for men and 88cm for women.

<sup>d</sup> Blood glucose greater than or equal to 11.1.

<sup>e</sup> Greater than or equal to 1.7 mmol/l.



1  
2  
3  
4  
5  
6  
7  
8  
9  
10  
11  
12  
13  
14  
15  
16  
17  
18  
19  
20  
21  
22  
23  
24  
25  
26  
27  
28  
29  
30  
31  
32  
33  
34  
35  
36  
37  
38  
39  
40  
41  
42  
43  
44  
45  
46  
47  
48  
49  
50  
51  
52  
53  
54  
55  
56  
57  
58  
59  
60

**Supplementary Materials**

Online Supplemental Tables 1-6

For peer review only

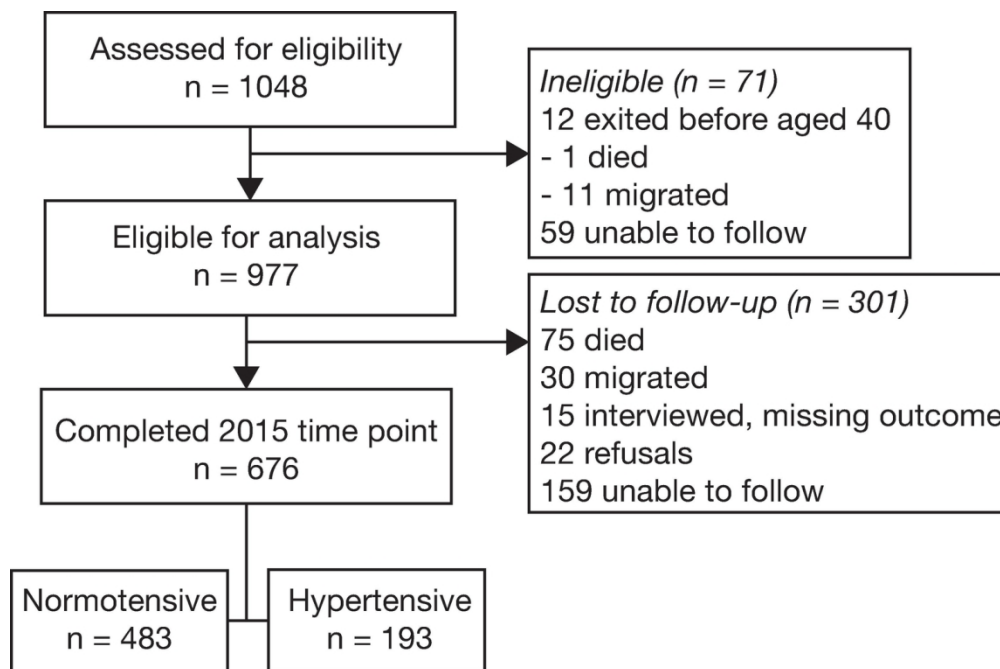

Figure 1

134x89mm (300 x 300 DPI)

1  
2  
3  
4  
5  
6  
7  
8  
9  
10  
11  
12  
13  
14  
15  
16  
17  
18  
19  
20  
21  
22  
23  
24  
25  
26  
27  
28  
29  
30  
31  
32  
33  
34  
35  
36  
37  
38  
39  
40  
41  
42  
43  
44  
45  
46  
47  
48  
49  
50  
51  
52  
53  
54  
55  
56  
57  
58  
59  
60

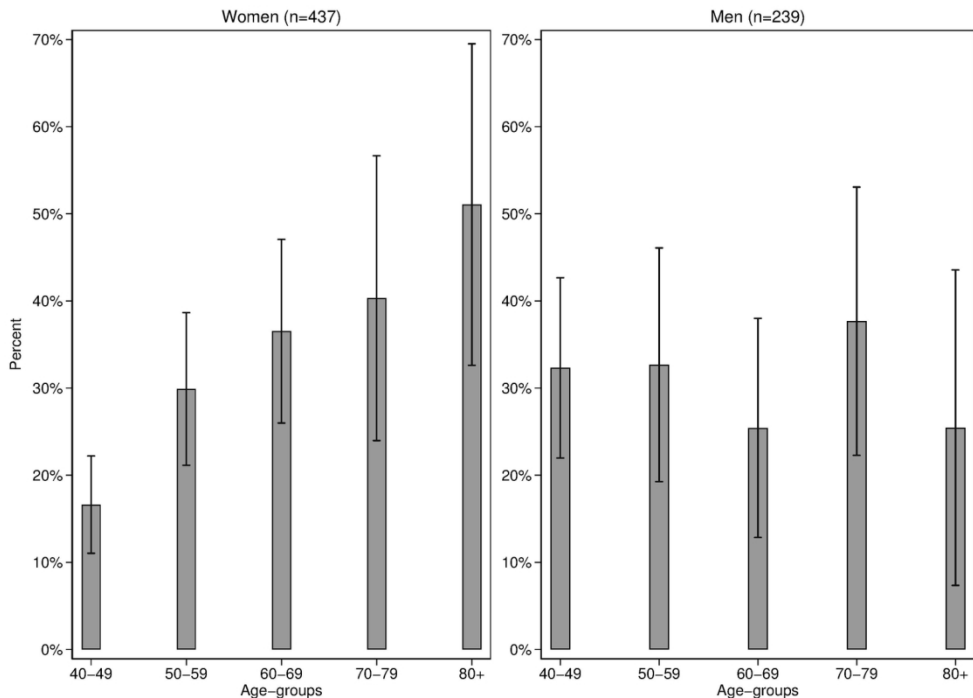

Figure 2

139x101mm (300 x 300 DPI)

## SUPPLEMENTARY MATERIALS

**Supplemental Table 1.** Hypertension incidence rates and incidence rate ratios per 100 person-years over 5 years of follow-up (2010-2015), by sociodemographic, health and behavioral factors among the full eligible sample.

| Value                 | Events | PYRS | IR    | 95% CI |       | IRR   | 95% CI |       | p-value |
|-----------------------|--------|------|-------|--------|-------|-------|--------|-------|---------|
|                       |        |      |       | Lower  | Upper |       | Lower  | Upper |         |
| Overall               | 193    | 3187 | 4.579 | 3.911  | 5.361 |       |        |       |         |
| Gender                |        |      |       |        |       |       |        |       |         |
| Male                  | 74     | 1203 | 5.14  | 4.078  | 6.548 | 1     |        |       |         |
| Female                | 119    | 1984 | 4.408 | 3.641  | 5.369 | 0.858 | 0.632  | 1.163 | 0.323   |
| Age groups            |        |      |       |        |       |       |        |       |         |
| 40-49                 | 56     | 1418 | 2.795 | 2.117  | 3.755 | 1     |        |       |         |
| 50-59                 | 47     | 727  | 5.092 | 3.731  | 7.069 | 1.821 | 1.191  | 2.786 | 0.006   |
| 60-69                 | 42     | 514  | 5.478 | 3.876  | 7.848 | 1.96  | 1.25   | 3.073 | 0.003   |
| 70-79                 | 28     | 316  | 6.244 | 4.127  | 9.655 | 2.233 | 1.347  | 3.704 | 0.002   |
| 80+                   | 20     | 212  | 8.825 | 5.585  | 14.45 | 3.157 | 1.83   | 5.445 | <0.001  |
| Education             |        |      |       |        |       |       |        |       |         |
| None                  | 85     | 1134 | 6.774 | 5.397  | 8.574 | 1     |        |       |         |
| Less than secondary   | 92     | 1258 | 6.158 | 4.919  | 7.769 | 0.909 | 0.658  | 1.257 | 0.563   |
| Secondary or more     | 16     | 298  | 3.756 | 2.19   | 6.868 | 0.555 | 0.305  | 1.008 | 0.053   |
| Union status          |        |      |       |        |       |       |        |       |         |
| Not in union          | 91     | 1508 | 4.237 | 3.38   | 5.357 | 1     |        |       |         |
| Formal/informal union | 102    | 1679 | 4.928 | 3.984  | 6.144 | 1.163 | 0.849  | 1.593 | 0.347   |
| SES <sup>a</sup>      |        |      |       |        |       |       |        |       |         |
| Low                   | 68     | 1248 | 3.909 | 3.01   | 5.138 | 1     |        |       |         |
| Middle                | 64     | 975  | 5.612 | 4.325  | 7.372 | 1.436 | 0.986  | 2.089 | 0.059   |
| High                  | 60     | 946  | 4.464 | 3.362  | 6.007 | 1.142 | 0.772  | 1.69  | 0.507   |
| Employment status     |        |      |       |        |       |       |        |       |         |
| Not employed          | 144    | 1970 | 6.057 | 5.062  | 7.284 | 1     |        |       |         |
| Employed              | 48     | 706  | 6.503 | 4.83   | 8.911 | 1.074 | 0.754  | 1.529 | 0.694   |
| Smoking history       |        |      |       |        |       |       |        |       |         |
| Never                 | 163    | 2573 | 4.638 | 3.92   | 5.514 | 1     |        |       |         |
| Prior                 | 11     | 218  | 4.314 | 2.36   | 8.558 | 0.93  | 0.49   | 1.765 | 0.825   |
| Current               | 19     | 396  | 3.89  | 2.441  | 6.48  | 0.839 | 0.506  | 1.391 | 0.496   |
| Alcohol use           |        |      |       |        |       |       |        |       |         |
| Not in past 30 days   | 153    | 2546 | 4.522 | 3.805  | 5.401 | 1     |        |       |         |
| Less than weekly      | 10     | 227  | 3.557 | 1.875  | 7.414 | 0.787 | 0.399  | 1.549 | 0.488   |

|    |                                |     |      |        |       |        |       |       |       |       |
|----|--------------------------------|-----|------|--------|-------|--------|-------|-------|-------|-------|
| 1  |                                |     |      |        |       |        |       |       |       |       |
| 2  |                                |     |      |        |       |        |       |       |       |       |
| 3  | Weekly                         | 30  | 414  | 5.546  | 3.691 | 8.558  | 1.227 | 0.784 | 1.92  | 0.372 |
| 4  | Physical activity <sup>b</sup> |     |      |        |       |        |       |       |       |       |
| 5  | Low                            | 20  | 199  | 6.424  | 3.801 | 11.185 | 1     |       |       |       |
| 6  | Moderate                       | 71  | 913  | 6.323  | 4.899 | 8.246  | 0.984 | 0.548 | 1.769 | 0.958 |
| 7  | High                           | 100 | 2017 | 3.798  | 3.073 | 4.733  | 0.591 | 0.335 | 1.043 | 0.07  |
| 8  | High waist                     |     |      |        |       |        |       |       |       |       |
| 9  | circumference <sup>c</sup>     |     |      |        |       |        |       |       |       |       |
| 10 | No                             | 104 | 2106 | 3.629  | 2.936 | 4.523  | 1     |       |       |       |
| 11 | Yes                            | 78  | 974  | 5.796  | 4.544 | 7.455  | 1.597 | 1.151 | 2.215 | 0.005 |
| 12 | Diabetes <sup>d</sup>          |     |      |        |       |        |       |       |       |       |
| 13 | No                             | 186 | 3095 | 4.513  | 3.851 | 5.311  | 1     |       |       |       |
| 14 | Yes                            | 6   | 81   | 6.868  | 2.92  | 18.668 | 1.522 | 0.64  | 3.621 | 0.342 |
| 15 | High                           |     |      |        |       |        |       |       |       |       |
| 16 | triglycerides <sup>e</sup>     |     |      |        |       |        |       |       |       |       |
| 17 | No                             | 122 | 2269 | 4.084  | 3.367 | 4.989  | 1     |       |       |       |
| 18 | Yes                            | 59  | 817  | 5.344  | 4.014 | 7.203  | 1.309 | 0.922 | 1.857 | 0.132 |
| 19 | HIV and ART                    |     |      |        |       |        |       |       |       |       |
| 20 | status                         |     |      |        |       |        |       |       |       |       |
| 21 | Negative                       | 155 | 1522 | 10.254 | 8.726 | 12.104 | 1     |       |       |       |
| 22 | Positive, not on               |     |      |        |       |        |       |       |       |       |
| 23 | ART                            | 25  | 490  | 4.615  | 3.054 | 7.246  | 0.45  | 0.286 | 0.708 | 0.001 |
| 24 | Positive, on                   |     |      |        |       |        |       |       |       |       |
| 25 | ART                            | 6   | 178  | 3.553  | 1.52  | 10.122 | 0.346 | 0.145 | 0.827 | 0.017 |

<sup>a</sup> Based on a household asset index score.

<sup>b</sup> Based on the International Physical Activity Questionnaire (IPAQ).

<sup>c</sup> Greater than 102cm for men and 88cm for women.

<sup>d</sup> Blood glucose greater than or equal to 11.1.

<sup>e</sup> Greater than or equal to 1.7 mmol/l.

**Supplemental Table 2.** Multivariable Poisson regression of incident hypertension on sociodemographic, health and behavioral risk factors among the full eligible sample (n=721).

|                                      | 95% CI |       |       | p-value |
|--------------------------------------|--------|-------|-------|---------|
|                                      | IRR    | Lower | Upper |         |
| <b>Gender</b>                        |        |       |       |         |
| Male                                 | 1      |       |       |         |
| Female                               | 0.783  | 0.489 | 1.253 | 0.307   |
| <b>Age groups</b>                    |        |       |       |         |
| 40-49                                | 1      |       |       |         |
| 50-59                                | 1.871  | 1.205 | 2.905 | 0.005   |
| 60-69                                | 1.972  | 1.146 | 3.392 | 0.014   |
| 70-79                                | 2.183  | 1.149 | 4.146 | 0.017   |
| 80+                                  | 2.86   | 1.305 | 6.265 | 0.009   |
| <b>Education</b>                     |        |       |       |         |
| None                                 | 1      |       |       |         |
| Less than secondary                  | 0.947  | 0.647 | 1.387 | 0.781   |
| Secondary or more                    | 0.607  | 0.3   | 1.227 | 0.164   |
| <b>Union status</b>                  |        |       |       |         |
| Not in union                         | 1      |       |       |         |
| Formal/informal union                | 0.972  | 0.678 | 1.392 | 0.876   |
| <b>SES<sup>a</sup></b>               |        |       |       |         |
| Low                                  | 1      |       |       |         |
| Middle                               | 1.258  | 0.825 | 1.918 | 0.286   |
| High                                 | 0.963  | 0.599 | 1.55  | 0.878   |
| <b>Employment status</b>             |        |       |       |         |
| Not employed                         | 1      |       |       |         |
| Employed                             | 1.814  | 1.195 | 2.752 | 0.005   |
| <b>Smoking history</b>               |        |       |       |         |
| Never                                | 1      |       |       |         |
| Prior                                | 0.802  | 0.381 | 1.688 | 0.562   |
| Current                              | 0.71   | 0.362 | 1.393 | 0.32    |
| <b>Alcohol use</b>                   |        |       |       |         |
| Not in past 30 days                  | 1      |       |       |         |
| Less than weekly                     | 0.86   | 0.415 | 1.779 | 0.684   |
| Weekly                               | 1.114  | 0.646 | 1.922 | 0.698   |
| <b>Physical activity<sup>b</sup></b> |        |       |       |         |
| Low                                  | 1      |       |       |         |
| Moderate                             | 0.906  | 0.495 | 1.656 | 0.748   |

|                                       |       |       |       |       |
|---------------------------------------|-------|-------|-------|-------|
| High                                  | 0.639 | 0.342 | 1.195 | 0.161 |
| High waist circumference <sup>c</sup> |       |       |       |       |
| No                                    | 1     |       |       |       |
| Yes                                   | 1.564 | 1.047 | 2.335 | 0.029 |
| Diabetes <sup>d</sup>                 |       |       |       |       |
| No                                    | 1     |       |       |       |
| Yes                                   | 1.047 | 0.438 | 2.506 | 0.917 |
| High triglycerides <sup>e</sup>       |       |       |       |       |
| No                                    | 1     |       |       |       |
| Yes                                   | 1.126 | 0.776 | 1.633 | 0.532 |

<sup>a</sup> Based on a household asset index score.

<sup>b</sup> Based on the International Physical Activity Questionnaire (IPAQ).

<sup>c</sup> Greater than 102cm for men and 88cm for women.

<sup>d</sup> Blood glucose greater than or equal to 11.1.

<sup>e</sup> Greater than or equal to 1.7 mmol/l.

**Supplemental Table 3.** Multivariable Poisson regression of incident hypertension on sociodemographic, health (using BMI instead of waist circumference) and behavioral risk factors, and HIV and ART status among those completing baseline and follow-up time points (n=579).

|                                | IRR   | 95% CI |       | p-value |
|--------------------------------|-------|--------|-------|---------|
|                                |       | Lower  | Upper |         |
| Gender                         |       |        |       |         |
| Male                           | 1     |        |       |         |
| Female                         | 0.911 | 0.595  | 1.396 | 0.669   |
| Age groups                     |       |        |       |         |
| 40-49                          | 1     |        |       |         |
| 50-59                          | 1.906 | 1.237  | 2.938 | 0.003   |
| 60-69                          | 2.38  | 1.426  | 3.972 | 0.001   |
| 70-79                          | 2.649 | 1.444  | 4.857 | 0.002   |
| 80+                            | 2.335 | 1.055  | 5.168 | 0.036   |
| Education                      |       |        |       |         |
| None                           | 1     |        |       |         |
| Less than secondary            | 1.128 | 0.775  | 1.642 | 0.53    |
| Secondary or more              | 0.746 | 0.365  | 1.525 | 0.421   |
| Union status                   |       |        |       |         |
| Not in union                   | 1     |        |       |         |
| Formal/informal union          | 0.971 | 0.685  | 1.376 | 0.867   |
| SES <sup>a</sup>               |       |        |       |         |
| Low                            | 1     |        |       |         |
| Middle                         | 0.927 | 0.619  | 1.389 | 0.714   |
| High                           | 0.778 | 0.498  | 1.215 | 0.269   |
| Employment status              |       |        |       |         |
| Not employed                   | 1     |        |       |         |
| Employed                       | 1.526 | 1.014  | 2.295 | 0.043   |
| Smoking history                |       |        |       |         |
| Never                          | 1     |        |       |         |
| Prior                          | 0.732 | 0.342  | 1.565 | 0.421   |
| Current                        | 0.716 | 0.372  | 1.378 | 0.317   |
| Alcohol use                    |       |        |       |         |
| Not in past 30 days            | 1     |        |       |         |
| Less than weekly               | 0.752 | 0.363  | 1.559 | 0.444   |
| Weekly                         | 1.037 | 0.628  | 1.711 | 0.887   |
| Physical activity <sup>b</sup> |       |        |       |         |



|    |                            |       |       |       |       |
|----|----------------------------|-------|-------|-------|-------|
| 1  |                            |       |       |       |       |
| 2  |                            |       |       |       |       |
| 3  | Low                        | 1     |       |       |       |
| 4  | Moderate                   | 0.721 | 0.419 | 1.242 | 0.239 |
| 5  | High                       | 0.506 | 0.289 | 0.886 | 0.017 |
| 6  |                            |       |       |       |       |
| 7  | Obesity <sup>c</sup>       |       |       |       |       |
| 8  | No                         | 1     |       |       |       |
| 9  | Yes                        | 1.902 | 1.315 | 2.751 | 0.001 |
| 10 |                            |       |       |       |       |
| 11 | Diabetes <sup>d</sup>      |       |       |       |       |
| 12 | No                         | 1     |       |       |       |
| 13 | Yes                        | 0.916 | 0.371 | 2.263 | 0.849 |
| 14 |                            |       |       |       |       |
| 15 | High                       |       |       |       |       |
| 16 | triglycerides <sup>e</sup> |       |       |       |       |
| 17 | No                         | 1     |       |       |       |
| 18 | Yes                        | 1.346 | 0.965 | 1.876 | 0.08  |
| 19 |                            |       |       |       |       |
| 20 | HIV and ART                |       |       |       |       |
| 21 | status                     |       |       |       |       |
| 22 | Negative                   | 1     |       |       |       |
| 23 | Positive, not on           |       |       |       |       |
| 24 | ART                        | 0.504 | 0.315 | 0.809 | 0.004 |
| 25 | Positive, on               |       |       |       |       |
| 26 | ART                        | 0.507 | 0.221 | 1.165 | 0.11  |

<sup>a</sup> Based on a household asset index score.

<sup>b</sup> Based on the International Physical Activity Questionnaire (IPAQ).

<sup>c</sup> Greater than or equal to 30 BMI.

<sup>d</sup> Blood glucose greater than or equal to 11.1.

<sup>e</sup> Greater than or equal to 1.7 mmol/l.

**Supplemental Table 4.** Multivariable Poisson regression of incident hypertension (based on BP threshold only) on sociodemographic, health and behavioral risk factors, and HIV and ART status among those completing baseline and follow-up time points (n=581).

|                                      | 95% CI |       |       | p-value |
|--------------------------------------|--------|-------|-------|---------|
|                                      | IRR    | Lower | Upper |         |
| <b>Gender</b>                        |        |       |       |         |
| Male                                 | 1      |       |       |         |
| Female                               | 0.773  | 0.455 | 1.315 | 0.343   |
| <b>Age groups</b>                    |        |       |       |         |
| 40-49                                | 1      |       |       |         |
| 50-59                                | 1.902  | 1.17  | 3.093 | 0.01    |
| 60-69                                | 2.06   | 1.166 | 3.641 | 0.013   |
| 70-79                                | 1.432  | 0.658 | 3.117 | 0.366   |
| 80+                                  | 1.888  | 0.795 | 4.483 | 0.15    |
| <b>Education</b>                     |        |       |       |         |
| None                                 | 1      |       |       |         |
| Less than secondary                  | 0.99   | 0.648 | 1.514 | 0.965   |
| Secondary or more                    | 0.772  | 0.363 | 1.644 | 0.502   |
| <b>Union status</b>                  |        |       |       |         |
| Not in union                         | 1      |       |       |         |
| In union                             | 0.8    | 0.54  | 1.185 | 0.266   |
| <b>SES<sup>a</sup></b>               |        |       |       |         |
| Low                                  | 1      |       |       |         |
| Middle                               | 0.899  | 0.569 | 1.419 | 0.647   |
| High                                 | 0.657  | 0.394 | 1.094 | 0.106   |
| <b>Employment status</b>             |        |       |       |         |
| Not employed                         | 1      |       |       |         |
| Employed                             | 1.747  | 1.093 | 2.792 | 0.02    |
| <b>Smoking history</b>               |        |       |       |         |
| Never                                | 1      |       |       |         |
| Prior                                | 0.612  | 0.237 | 1.581 | 0.311   |
| Current                              | 0.61   | 0.291 | 1.277 | 0.189   |
| <b>Alcohol use</b>                   |        |       |       |         |
| Not in past 30 days                  | 1      |       |       |         |
| Less than weekly                     | 0.738  | 0.326 | 1.672 | 0.467   |
| Weekly                               | 0.959  | 0.542 | 1.699 | 0.887   |
| <b>Physical activity<sup>b</sup></b> |        |       |       |         |
| Low                                  | 1      |       |       |         |
| Moderate                             | 0.973  | 0.5   | 1.894 | 0.936   |

|                                       |       |       |       |        |
|---------------------------------------|-------|-------|-------|--------|
| High                                  | 0.669 | 0.33  | 1.355 | 0.264  |
| High waist circumference <sup>c</sup> |       |       |       |        |
| No                                    | 1     |       |       |        |
| Yes                                   | 1.361 | 0.882 | 2.102 | 0.164  |
| Diabetes <sup>d</sup>                 |       |       |       |        |
| No                                    | 1     |       |       |        |
| Yes                                   | 0.341 | 0.05  | 2.309 | 0.27   |
| High triglycerides <sup>e</sup>       |       |       |       |        |
| No                                    | 1     |       |       |        |
| Yes                                   | 1.19  | 0.792 | 1.789 | 0.402  |
| HIV and ART status                    |       |       |       |        |
| Negative                              | 1     |       |       |        |
| Positive, not on ART                  | 0.28  | 0.151 | 0.518 | <0.001 |
| Positive, on ART                      | 0.313 | 0.108 | 0.908 | 0.033  |

<sup>a</sup> Based on a household asset index score.

<sup>b</sup> Based on the International Physical Activity Questionnaire (IPAQ).

<sup>c</sup> Greater than 102cm for men and 88cm for women.

<sup>d</sup> Blood glucose greater than or equal to 11.1.

<sup>e</sup> Greater than or equal to 1.7 mmol/l.

**Supplemental Table 5.** Multivariable competing risk regression (Fine-Grey model) of incident hypertension on sociodemographic, health and behavioral risk factors among the full eligible sample (n=662).

|                                       | SHR   | 95% CI |       | p-value |
|---------------------------------------|-------|--------|-------|---------|
|                                       |       | Lower  | Upper |         |
| Gender                                |       |        |       |         |
| Male                                  | 1     |        |       |         |
| Female                                | 0.835 | 0.526  | 1.326 | 0.445   |
| Education                             |       |        |       |         |
| None                                  | 1     |        |       |         |
| Less than secondary                   | 1.1   | 0.766  | 1.58  | 0.607   |
| Secondary or more                     | 0.968 | 0.513  | 1.829 | 0.921   |
| Union status                          |       |        |       |         |
| Not in union                          | 1     |        |       |         |
| Formal/informal union                 | 1.067 | 0.759  | 1.5   | 0.708   |
| SES <sup>a</sup>                      |       |        |       |         |
| Low                                   | 1     |        |       |         |
| Middle                                | 1.021 | 0.689  | 1.512 | 0.919   |
| High                                  | 0.881 | 0.566  | 1.371 | 0.574   |
| Employment status                     |       |        |       |         |
| Not employed                          | 1     |        |       |         |
| Employed                              | 1.969 | 1.374  | 2.821 | <0.001  |
| Smoking history                       |       |        |       |         |
| Never                                 | 1     |        |       |         |
| Prior                                 | 0.772 | 0.38   | 1.57  | 0.475   |
| Current                               | 0.73  | 0.367  | 1.451 | 0.369   |
| Alcohol use                           |       |        |       |         |
| Not in past 30 days                   | 1     |        |       |         |
| Less than weekly                      | 0.882 | 0.432  | 1.798 | 0.729   |
| Weekly                                | 0.899 | 0.506  | 1.597 | 0.716   |
| Physical activity <sup>b</sup>        |       |        |       |         |
| Low                                   | 1     |        |       |         |
| Moderate                              | 1.184 | 0.667  | 2.102 | 0.564   |
| High                                  | 0.914 | 0.512  | 1.633 | 0.761   |
| High waist circumference <sup>c</sup> |       |        |       |         |
| No                                    | 1     |        |       |         |
| Yes                                   | 1.399 | 0.952  | 2.056 | 0.088   |
| Diabetes <sup>d</sup>                 |       |        |       |         |

|    |                            |       |       |       |       |
|----|----------------------------|-------|-------|-------|-------|
| 1  |                            |       |       |       |       |
| 2  |                            |       |       |       |       |
| 3  | No                         | 1     |       |       |       |
| 4  | Yes                        | 1.399 | 0.677 | 2.887 | 0.364 |
| 5  |                            |       |       |       |       |
| 6  | High                       |       |       |       |       |
| 7  | triglycerides <sup>e</sup> |       |       |       |       |
| 8  | No                         | 1     |       |       |       |
| 9  | Yes                        | 1.111 | 0.778 | 1.585 | 0.563 |
| 10 |                            |       |       |       |       |

<sup>a</sup> Based on a household asset index score.

<sup>b</sup> Based on the International Physical Activity Questionnaire (IPAQ).

<sup>c</sup> Greater than 102cm for men and 88cm for women.

<sup>d</sup> Blood glucose greater than or equal to 11.1.

<sup>e</sup> Greater than or equal to 1.7 mmol/l.

For peer review only

**Supplemental Table 6.** Cause of death by broad disease category for the full eligible sample.

| <b>Cause group</b>        | <b>N</b> | <b>%</b> |
|---------------------------|----------|----------|
| HIV/AIDS and TB           | 20       | 28       |
| Other infectious diseases | 16       | 23       |
| Noncommunicable diseases  | 34       | 48       |
| External                  | 1        | 1        |

Cause of death information from InterVA-4. Information on cause of death missing for 4 individuals.

For peer review only

**STROBE 2007 (v4) Statement—Checklist of items that should be included in reports of cohort studies**

| Section/Topic                | Item # | Recommendation                                                                                                                                                                       | Reported on page # |
|------------------------------|--------|--------------------------------------------------------------------------------------------------------------------------------------------------------------------------------------|--------------------|
| <b>Title and abstract</b>    | 1      | (a) Indicate the study’s design with a commonly used term in the title or the abstract                                                                                               | 2                  |
|                              |        | (b) Provide in the abstract an informative and balanced summary of what was done and what was found                                                                                  | 2                  |
| <b>Introduction</b>          |        |                                                                                                                                                                                      |                    |
| Background/rationale         | 2      | Explain the scientific background and rationale for the investigation being reported                                                                                                 | 4-5                |
| Objectives                   | 3      | State specific objectives, including any prespecified hypotheses                                                                                                                     | 5                  |
| <b>Methods</b>               |        |                                                                                                                                                                                      |                    |
| Study design                 | 4      | Present key elements of study design early in the paper                                                                                                                              | 5                  |
| Setting                      | 5      | Describe the setting, locations, and relevant dates, including periods of recruitment, exposure, follow-up, and data collection                                                      | 5                  |
| Participants                 | 6      | (a) Give the eligibility criteria, and the sources and methods of selection of participants. Describe methods of follow-up                                                           | 5                  |
|                              |        | (b) For matched studies, give matching criteria and number of exposed and unexposed                                                                                                  | NA                 |
| Variables                    | 7      | Clearly define all outcomes, exposures, predictors, potential confounders, and effect modifiers. Give diagnostic criteria, if applicable                                             | 6-7                |
| Data sources/<br>measurement | 8*     | For each variable of interest, give sources of data and details of methods of assessment (measurement). Describe comparability of assessment methods if there is more than one group | 6-7                |
| Bias                         | 9      | Describe any efforts to address potential sources of bias                                                                                                                            | 7-8                |
| Study size                   | 10     | Explain how the study size was arrived at                                                                                                                                            | 5                  |
| Quantitative variables       | 11     | Explain how quantitative variables were handled in the analyses. If applicable, describe which groupings were chosen and why                                                         | 7-8                |
| Statistical methods          | 12     | (a) Describe all statistical methods, including those used to control for confounding                                                                                                | 7-8                |
|                              |        | (b) Describe any methods used to examine subgroups and interactions                                                                                                                  | NA                 |
|                              |        | (c) Explain how missing data were addressed                                                                                                                                          | 7-8                |
|                              |        | (d) If applicable, explain how loss to follow-up was addressed                                                                                                                       | 7-8                |
|                              |        | (e) Describe any sensitivity analyses                                                                                                                                                | 8                  |
| <b>Results</b>               |        |                                                                                                                                                                                      |                    |

|                          |     |                                                                                                                                                                                                              |                                 |
|--------------------------|-----|--------------------------------------------------------------------------------------------------------------------------------------------------------------------------------------------------------------|---------------------------------|
| Participants             | 13* | (a) Report numbers of individuals at each stage of study—eg numbers potentially eligible, examined for eligibility, confirmed eligible, included in the study, completing follow-up, and analysed            | 9                               |
|                          |     | (b) Give reasons for non-participation at each stage                                                                                                                                                         | 9                               |
|                          |     | (c) Consider use of a flow diagram                                                                                                                                                                           | Figure 1                        |
| Descriptive data         | 14* | (a) Give characteristics of study participants (eg demographic, clinical, social) and information on exposures and potential confounders                                                                     | 9; Table 1                      |
|                          |     | (b) Indicate number of participants with missing data for each variable of interest                                                                                                                          |                                 |
|                          |     | (c) Summarise follow-up time (eg, average and total amount)                                                                                                                                                  | Table 2                         |
| Outcome data             | 15* | Report numbers of outcome events or summary measures over time                                                                                                                                               | 9                               |
| Main results             | 16  | (a) Give unadjusted estimates and, if applicable, confounder-adjusted estimates and their precision (eg, 95% confidence interval). Make clear which confounders were adjusted for and why they were included | 9-10, Table 2, Table 3, Table 4 |
|                          |     | (b) Report category boundaries when continuous variables were categorized                                                                                                                                    | Table 2, Table 3, Table 4       |
|                          |     | (c) If relevant, consider translating estimates of relative risk into absolute risk for a meaningful time period                                                                                             | NA                              |
| Other analyses           | 17  | Report other analyses done—eg analyses of subgroups and interactions, and sensitivity analyses                                                                                                               | 11                              |
| <b>Discussion</b>        |     |                                                                                                                                                                                                              |                                 |
| Key results              | 18  | Summarise key results with reference to study objectives                                                                                                                                                     | 11-12                           |
| <b>Limitations</b>       |     |                                                                                                                                                                                                              |                                 |
| Interpretation           | 20  | Give a cautious overall interpretation of results considering objectives, limitations, multiplicity of analyses, results from similar studies, and other relevant evidence                                   | 12-14                           |
| Generalisability         | 21  | Discuss the generalisability (external validity) of the study results                                                                                                                                        | 13                              |
| <b>Other information</b> |     |                                                                                                                                                                                                              |                                 |
| Funding                  | 22  | Give the source of funding and the role of the funders for the present study and, if applicable, for the original study on which the present article is based                                                | 15                              |

\*Give information separately for cases and controls in case-control studies and, if applicable, for exposed and unexposed groups in cohort and cross-sectional studies.

**Note:** An Explanation and Elaboration article discusses each checklist item and gives methodological background and published examples of transparent reporting. The STROBE checklist is best used in conjunction with this article (freely available on the Web sites of PLoS Medicine at <http://www.plosmedicine.org/>, Annals of Internal Medicine at <http://www.annals.org/>, and Epidemiology at <http://www.epidem.com/>). Information on the STROBE Initiative is available at [www.strobe-statement.org](http://www.strobe-statement.org).



# BMJ Open

## Hypertension incidence among middle-aged and older adults: Findings from a 5-year prospective study in rural South Africa, 2010-2015

|                                 |                                                                                                                                                                                                                                                                                                                                                                                                                                                                                                                                                                                                                                                                                                                                                                                                                                                                                                                                                                                                                                                                                                                                                                                                                                                                                                                                                                                                                                                                                              |
|---------------------------------|----------------------------------------------------------------------------------------------------------------------------------------------------------------------------------------------------------------------------------------------------------------------------------------------------------------------------------------------------------------------------------------------------------------------------------------------------------------------------------------------------------------------------------------------------------------------------------------------------------------------------------------------------------------------------------------------------------------------------------------------------------------------------------------------------------------------------------------------------------------------------------------------------------------------------------------------------------------------------------------------------------------------------------------------------------------------------------------------------------------------------------------------------------------------------------------------------------------------------------------------------------------------------------------------------------------------------------------------------------------------------------------------------------------------------------------------------------------------------------------------|
| Journal:                        | <i>BMJ Open</i>                                                                                                                                                                                                                                                                                                                                                                                                                                                                                                                                                                                                                                                                                                                                                                                                                                                                                                                                                                                                                                                                                                                                                                                                                                                                                                                                                                                                                                                                              |
| Manuscript ID                   | bmjopen-2021-049621.R1                                                                                                                                                                                                                                                                                                                                                                                                                                                                                                                                                                                                                                                                                                                                                                                                                                                                                                                                                                                                                                                                                                                                                                                                                                                                                                                                                                                                                                                                       |
| Article Type:                   | Original research                                                                                                                                                                                                                                                                                                                                                                                                                                                                                                                                                                                                                                                                                                                                                                                                                                                                                                                                                                                                                                                                                                                                                                                                                                                                                                                                                                                                                                                                            |
| Date Submitted by the Author:   | 21-Sep-2021                                                                                                                                                                                                                                                                                                                                                                                                                                                                                                                                                                                                                                                                                                                                                                                                                                                                                                                                                                                                                                                                                                                                                                                                                                                                                                                                                                                                                                                                                  |
| Complete List of Authors:       | Houle , Brian ; Australian National University, School of Demography; University of the Witwatersrand School of Public Health, MRC/Wits Rural Public Health and Health Transitions Research Unit (Agincourt)<br>Gaziano, Thomas A.; Brigham and Women's Hospital, Division of Cardiovascular Medicine; Harvard University, Harvard Medical School<br>Angotti, Nicole; American University, Department of Sociology; University of the Witwatersrand School of Public Health, MRC/Wits Rural Public Health and Health Transitions Research Unit (Agincourt)<br>Mojola, Sanyu A; Princeton University, Department of Sociology, School of Public and International Affairs, and Office of Population Research; University of the Witwatersrand School of Public Health, MRC/Wits Rural Public Health and Health Transitions Research Unit (Agincourt)<br>Kabudula, Chodziwadziwa; University of the Witwatersrand School of Public Health, MRC/Wits Rural Public Health and Health Transitions Research Unit (Agincourt); INDEPTH Network<br>Tollman, Stephen; University of the Witwatersrand School of Public Health, MRC/Wits Rural Public Health and Health Transitions Research Unit (Agincourt); Umea University, Centre for Global Health Research<br>Gómez-Olivé, F. Xavier; University of the Witwatersrand School of Public Health, MRC/Wits Rural Public Health and Health Transitions Research Unit (Agincourt); Harvard University, Center for Population and Development Studies |
| <b>Primary Subject Heading</b>: | Epidemiology                                                                                                                                                                                                                                                                                                                                                                                                                                                                                                                                                                                                                                                                                                                                                                                                                                                                                                                                                                                                                                                                                                                                                                                                                                                                                                                                                                                                                                                                                 |
| Secondary Subject Heading:      | Global health, HIV/AIDS                                                                                                                                                                                                                                                                                                                                                                                                                                                                                                                                                                                                                                                                                                                                                                                                                                                                                                                                                                                                                                                                                                                                                                                                                                                                                                                                                                                                                                                                      |
| Keywords:                       | Hypertension < CARDIOLOGY, PUBLIC HEALTH, HIV & AIDS < INFECTIOUS DISEASES, EPIDEMIOLOGY                                                                                                                                                                                                                                                                                                                                                                                                                                                                                                                                                                                                                                                                                                                                                                                                                                                                                                                                                                                                                                                                                                                                                                                                                                                                                                                                                                                                     |
|                                 |                                                                                                                                                                                                                                                                                                                                                                                                                                                                                                                                                                                                                                                                                                                                                                                                                                                                                                                                                                                                                                                                                                                                                                                                                                                                                                                                                                                                                                                                                              |

SCHOLARONE™  
Manuscripts



I, the Submitting Author has the right to grant and does grant on behalf of all authors of the Work (as defined in the below author licence), an exclusive licence and/or a non-exclusive licence for contributions from authors who are: i) UK Crown employees; ii) where BMJ has agreed a CC-BY licence shall apply, and/or iii) in accordance with the terms applicable for US Federal Government officers or employees acting as part of their official duties; on a worldwide, perpetual, irrevocable, royalty-free basis to BMJ Publishing Group Ltd ("BMJ") its licensees and where the relevant Journal is co-owned by BMJ to the co-owners of the Journal, to publish the Work in this journal and any other BMJ products and to exploit all rights, as set out in our [licence](#).

The Submitting Author accepts and understands that any supply made under these terms is made by BMJ to the Submitting Author unless you are acting as an employee on behalf of your employer or a postgraduate student of an affiliated institution which is paying any applicable article publishing charge ("APC") for Open Access articles. Where the Submitting Author wishes to make the Work available on an Open Access basis (and intends to pay the relevant APC), the terms of reuse of such Open Access shall be governed by a Creative Commons licence – details of these licences and which [Creative Commons](#) licence will apply to this Work are set out in our licence referred to above.

Other than as permitted in any relevant BMJ Author's Self Archiving Policies, I confirm this Work has not been accepted for publication elsewhere, is not being considered for publication elsewhere and does not duplicate material already published. I confirm all authors consent to publication of this Work and authorise the granting of this licence.

1  
2  
3 **Hypertension incidence among middle-aged and older adults: Findings from a 5-year**  
4 **prospective study in rural South Africa, 2010-2015**  
5  
6

7 Brian Houle,<sup>1,2,3</sup> Thomas Gaziano,<sup>4,5</sup> Nicole Angotti,<sup>2,3,6</sup> Sanyu A Mojola,<sup>2,7</sup> Chodziwadziwa  
8 W Kabudula,<sup>2,8</sup> Stephen M Tollman,<sup>2,8,9</sup> F Xavier Gómez-Olivé<sup>2,8,10</sup>  
9  
10  
11  
12  
13

14 1 School of Demography, The Australian National University, Canberra, ACT, Australia

15 2 MRC/Wits Rural Public Health and Health Transitions Research Unit (Agincourt), School  
16 of Public Health, Faculty of Health Sciences, University of the Witwatersrand, Johannesburg,  
17 South Africa  
18  
19  
20  
21  
22

23 3 Institute of Behavioral Science, University of Colorado Boulder, Boulder, Colorado, USA

24 4 Division of Cardiovascular Medicine, Brigham and Women's Hospital, Boston, MA, USA

25 5 Harvard Medical School, Harvard University, Boston, MA, USA

26 6 Department of Sociology, American University, Washington, DC, USA

27 7 Department of Sociology, School of Public and International Affairs, and Office of  
28 Population Research, Princeton University, Princeton, NJ, USA  
29  
30

31 8 INDEPTH Network, Accra, Ghana

32 9 Centre for Global Health Research, Umeå University, Umeå, Sweden

33 10 Harvard Center for Population and Development Studies, Harvard University, Cambridge,  
34 MA, USA  
35  
36  
37  
38  
39

40  
41  
42  
43  
44  
45  
46  
47  
48  
49 **Correspondence to:** Brian Houle; [brian.houle@anu.edu.au](mailto:brian.houle@anu.edu.au)

50  
51 **Word count:** 3,146  
52  
53  
54  
55  
56  
57  
58  
59  
60

## ABSTRACT

**Objectives:** There is a scarcity of longitudinal cohort studies in sub-Saharan Africa to understand the epidemiology of cardiovascular disease as a basis for intervention. We estimated incident hypertension and associated sociodemographic, health and behavioural risk factors in a population aged 40 and older over a 5-year period.

**Design:** We assessed the association between incident hypertension and sociodemographic, health and behavioural factors using Poisson regression. We adjusted for nonresponse in 2015 using inverse probability sampling weights from a logistic regression including sex and age at baseline.

**Setting:** Rural South Africa.

**Participants:** We used a population-based cohort of normotensive adults in 2010 who were ages 40 and older at retest in 2015.

**Results:** Of 676 individuals completing baseline and 5-year follow-up, there were 193 incident cases of hypertension. The overall hypertension incidence rate was 8.374/100 person-years. In multivariable analyses, those that became hypertensive were more likely to be older, have a high waist circumference (incidence rate ratio (IRR): 1.557 95% CI: 1.074-2.259) and be employed (IRR: 1.579 95% CI 1.071-2.329) at baseline. Being HIV-positive and not on antiretroviral therapy at baseline was associated with lower risk of incident hypertension.

**Conclusions:** Over a 5-year period, 29% of respondents developed hypertension. Given the high burden of hypertension in South Africa, continued longitudinal follow-up is needed to understand the complex interplay of noncommunicable and infectious diseases and their underlying and modifiable risk factors to inform public health prevention strategies and programs.

**Keywords:** Hypertension; incidence; South Africa; rural population; cohort

### Strengths and limitations of this study

- We provide longitudinal evidence on hypertension incidence from a population-based cohort in rural South Africa including both HIV positive and HIV negative individuals.
- Associations between HIV status and incident hypertension may be sensitive to survivorship bias if those who died due to HIV/AIDS over the five-year period were also more likely to develop hypertension.
- A longer period of follow-up is needed to assess the effects of HIV and ART on hypertension and related cardiometabolic conditions.

## INTRODUCTION

Hypertension is one of the most important noncommunicable disease (NCD) risk factors and the largest contributor to the global burden of disease, with high blood pressure accounting for 7% of global disability-adjusted life years.<sup>1</sup> The burden of hypertension is greatest in low and middle-income countries (LMIC),<sup>2</sup> and has increased rapidly in sub-Saharan Africa.<sup>3-7</sup> A study of people aged 50 years and over from six countries found markedly high prevalence in South Africa (77.9%).<sup>8</sup>

Rapid demographic and epidemiological changes in LMICs, such as population aging, are expected to dramatically increase hypertension prevalence. Results from a modelling study found that without any changes in the age-specific prevalence of hypertension, the hypertensive population in South Africa is expected to grow by 105% by 2050.<sup>9</sup> These dramatic changes on the epidemiology of hypertension are further complicated by a lack of awareness by those with a hypertensive condition, with serious consequences of a low proportion of hypertensive individuals being on treatment.<sup>10-12</sup> In South Africa, an estimated 38-64% of hypertensives were aware of their status and 7.8-22.8% effectively controlled.<sup>8 13</sup>

Longitudinal data from sub-Saharan Africa are needed to examine changes in population-specific hypertension risk factors over time,<sup>14</sup> particularly given differences in socio-cultural environments and related health factors (e.g., diet, concurrent infectious diseases), and differentials in rural versus urban risk factor levels.<sup>15</sup> This is particularly important as widescale availability of antiretroviral therapy (ART) has reduced HIV/AIDS-related mortality<sup>16 17</sup> thereby increasing the population of those aging with HIV.<sup>18</sup> The aging population will be at higher risk of developing hypertension, and the effect of HIV and ART may also increase the incidence of hypertension.<sup>19-22</sup> In South Africa, an emerging dual

1  
2  
3 burden of disease, along with urban-rural differences due to the legacy of the apartheid era  
4  
5 also highlight the importance of understanding location-specific hypertension risk factors  
6  
7 over time.<sup>23</sup> However, there are currently a limited number of longitudinal studies examining  
8  
9 risk factors for incident hypertension in the region, with most of these restricted to HIV  
10  
11 positive individuals only.<sup>24-27</sup>  
12  
13  
14  
15  
16

## 17 **METHODS**

18  
19 We use a population-based cohort of adults in rural South Africa who were normotensive in  
20  
21 2010-11 and were 40 years or older in 2014-15 to estimate hypertension incidence and  
22  
23 identify sociodemographic, health and behavioural risk factors over a five-year period.  
24  
25  
26  
27

28  
29 We use data from two survey studies conducted in 2010-11 and 2014-2015 in the Agincourt  
30  
31 Health and socio-Demographic Surveillance System (HDSS) study area in rural northeast  
32  
33 South Africa.<sup>28</sup> The area is a low rainfall setting with limited subsistence farming. Since  
34  
35 1992, the Medical Research Council (MRC)/Wits Rural Public Health and Health Transitions  
36  
37 Unit has been conducting an annual census update of the population living in the study site,  
38  
39 including information on vital events (births, deaths, migrations) and household and  
40  
41 individual socio-demographic information. In 2010-11, the baseline study (Ha Nakekela)  
42  
43 included a sex-age stratified random sample of 7,662 men and women aged 15 and older who  
44  
45 were permanent residents from the 2009 HDSS census.<sup>29</sup> A follow-up study from November  
46  
47 2014 to November 2015 (The Health and Aging in Africa: A Longitudinal Study of an  
48  
49 INDEPTH Community in South Africa (HAALSI)) included a random sample of 6,281 men  
50  
51 and women aged 40 years and older who were permanent residents from the 2013 HDSS  
52  
53 census,<sup>30</sup> including those in the baseline study who fulfilled the inclusion criteria. Both  
54  
55 studies included information on sociodemographic factors and self-reported health and  
56  
57  
58  
59  
60

1  
2  
3 conditions, anthropometric and blood pressure measurements, and point of care blood tests  
4  
5 for glucose and lipids, and dried blood spots (DBS) for HIV status.  
6  
7  
8  
9

## 10 **Outcome measure**

11  
12 **Blood pressure (BP) and hypertension.** BP was measured three times using a Boso BP  
13  
14 instrument two minutes apart in 2010 and an Omron M6W automated cuff two minutes apart  
15  
16 in 2015. Validation studies of similar blood pressure monitoring devices indicate that they  
17  
18 can provide accurate measurements.<sup>31–33</sup> Consistent with national surveillance guidance, we  
19  
20 used the average of the second and third measurements.<sup>34</sup> Hypertension was defined as a  
21  
22 systolic blood pressure  $\geq 140$  mmHg or diastolic blood pressure  $\geq 90$  mmHg or if the  
23  
24 respondent self-reported taking antihypertensive medication.  
25  
26  
27  
28  
29  
30

## 31 **2010 risk factors**

32  
33 **Anthropometry and high waist circumference.** Height, weight, and waist circumference  
34  
35 were measured using a flexible stadiometer (Seca). High waist circumference was defined as  
36  
37  $>102$ cm for men and  $>88$ cm for women.<sup>35</sup> Obesity was classified as a body mass index  
38  
39 (BMI;  $\text{kg}/\text{m}^2$ )  $\geq 30$ .<sup>35</sup>  
40  
41  
42  
43  
44

45 **Random blood glucose and diabetes.** Point of care instruments were used to measure  
46  
47 glucose (Caresens POP blood glucose meter). Diabetes was defined as a random blood  
48  
49 glucose level of  $\geq 11.1$  mmol/L or if the respondent self-reported medication use for  
50  
51 diabetes.<sup>36</sup>  
52  
53  
54  
55

56 **High triglycerides.** A Cardiocheck instrument was used to measure lipid levels. High  
57  
58 triglycerides was defined as  $\geq 1.7$  mmol/l.<sup>37</sup>  
59  
60



1  
2  
3  
4  
5  
6 **HIV status.** HIV DBS were tested using screening assay Vironostika Uniform 11  
7  
8 (Biomerieux, France); with positive results retested using the SD Bioline HIV ELISA test  
9  
10 (SD; Standard Diagnostics Inc., Korea). If the two tests were inconsistent, we conducted a  
11  
12 third assay (Elecys, Roche, USA) that determined the final result.  
13  
14

15  
16  
17 **Socio-demographics and behaviours.** Respondents were asked about smoking (never, prior,  
18  
19 current) and alcohol history (not in past 30 days, less than weekly, weekly), physical activity  
20  
21 (using the International Physical Activity Questionnaire (IPAQ)), and if they were using  
22  
23 ART. Information on years of completed education, employment (currently working for pay),  
24  
25 union (informal or formal) and socioeconomic status (based on tertiles of an asset index<sup>38</sup>)  
26  
27 were extracted from the most recent surveillance census.  
28  
29  
30

31  
32  
33 **Cause of death:** For those who died between the baseline and follow-up study and for whom  
34  
35 a death was identified from census updates, a verbal autopsy (VA) was conducted using a  
36  
37 standardized VA instrument. For each identified death, a specially trained team conducted a  
38  
39 VA interview with the closest living care taker to record signs and symptoms experienced  
40  
41 before the death. We categorized cause of death using InterVA-4<sup>39</sup> – assigning a single cause  
42  
43 for the largest likelihood for each death.  
44  
45  
46  
47  
48

## 49 **Analysis**

50  
51 We calculated hypertension incidence (over five years) for those aged 40 years and older at  
52  
53 the time of the second survey overall, and by sex, age, and other socio-demographic factors.  
54  
55 We calculated age-adjusted incidence using the Agincourt 2009 census population. We used  
56  
57 Poisson regression with robust standard errors to examine the association of hypertension  
58  
59  
60

1  
2  
3 status with socio-demographic, health and behavioural risk factors from the baseline study.

4  
5 To adjust for nonresponse in the follow-up study, we developed inverse probability sampling  
6 weights (IPSW) based on a logistic regression including sex and age in August 2010. We  
7 multiplied the IPSW for nonresponse by the inverse probability weights from the 2010  
8 sample selection to derive our final weights for analysis. For our fully adjusted multivariable  
9 models, we fit separate models with and without HIV/ART status given a reduced sample of  
10 2010 respondents with measured HIV status (particularly for the eligible sample estimates,  
11 see below).  
12  
13  
14  
15  
16  
17  
18  
19  
20  
21  
22

23 We used two approaches to estimating exposure time for our incidence estimates. For the first  
24 approach, we included only those individuals who participated in both surveys. For incident  
25 cases, we defined exposure time as the midpoint between the dates of the first and second  
26 survey assessments. For the second approach, we included all eligible individuals from the  
27 first survey who were able to be tracked from census data. For those who out-migrated or  
28 died before the start of the second study, we allowed them to contribute exposure time  
29 between their blood pressure measurement in the first study and time at death or out-  
30 migration. For those who were not found or refused to participate in the second survey, we  
31 allowed exposure time between the first study's measurement and the start of the second  
32 study. As the second approach includes additional exposure time but no new incident cases, it  
33 provides a lower bound for our estimate of hypertension incidence. Individuals who aged to  
34 40 during the follow-up time only contributed to exposure when they had reached 40 years or  
35 older. We used Stata 15 for all statistical analyses.<sup>40</sup>  
36  
37  
38  
39  
40  
41  
42  
43  
44  
45  
46  
47  
48  
49  
50  
51  
52  
53  
54  
55

56 We also tested the sensitivity of our results. We tested models using either BMI or waist-to-  
57 hip ratio instead of waist circumference. We also tested a model of hypertension based on  
58  
59  
60

1  
2  
3 only BP thresholds to assess if there were differences in the associations between predictors  
4 and incident BP only. Finally, we tested a competing-risk model for those eligible individuals  
5 who either died, migrated, or completed the follow-up study to test for bias in our risk factor  
6 associations. We modelled incident hypertension as the main event and death due to any  
7 cause as a competing event (censoring those who out-migrated) using the Fine-Grey model.<sup>41</sup>  
8  
9  
10  
11  
12  
13  
14  
15  
16

### 17 **Patient and public involvement**

18  
19 Neither study participants nor public were involved in study design or conduct of the study.  
20  
21 The HDSS Learning, Information dissemination and Networking with Community (LINC)  
22 office manages community liaison activities with the HDSS study communities and their  
23 leaders. Annual feedback of findings from the HDSS census and research projects conducted  
24 in the site are provided through open village meetings, with frequent participation from local  
25 service providers.  
26  
27  
28  
29  
30  
31  
32  
33  
34

### 35 **RESULTS**

36  
37 Figure 1 shows the participant flowchart. A total of 977 individuals were eligible for analysis  
38 from the first study and 676 (69%) also completed the second study. Table 1 presents sample  
39 characteristics from the baseline study comparing those who completed the second study and  
40 those who did not. Women, those with a high waist circumference, those in older ages and in  
41 a union with lower completed education were more likely to participate in the second study.  
42  
43  
44  
45  
46  
47  
48  
49  
50

51 There were 193 incident cases of hypertension since baseline. The overall hypertension  
52 incidence rate was 8.374 per 100 person-years (95% CI: 7.242-9.721) for those completing  
53 both studies (men 9.097 (95% CI: 7.266-11.496); women 8.159 (95% CI: 6.832-9.804);  
54 Table 2). The overall age-adjusted hypertension incidence rate for those completing both  
55  
56  
57  
58  
59  
60

1  
2  
3 studies was 8.372 per 100 person-years (men 8.955; women 8.50). Rates were lower when  
4 including the full eligible sample (Online supplemental table 1). Men in their 40s and 50s had  
5 higher incidence compared to same-aged women; from ages 60-plus, women showed higher  
6 rates than men (Figure 2).  
7  
8  
9  
10  
11  
12  
13

14 Table 2 shows incident rates and ratios (unadjusted) for those completing both studies by  
15 baseline socio-demographic, health, and behavioural risk factors. Older individuals had  
16 higher incident hypertension risk compared to those ages 40-49. Those with high waist  
17 circumference and elevated triglycerides had a higher risk of incident hypertension.  
18 Respondents engaging in high physical activity levels had a lower risk of incident  
19 hypertension compared to those with low physical activity levels. Compared to those HIV-  
20 negative at baseline, those HIV-positive and not on ART had a 55% lower risk of developing  
21 hypertension over the 5 years of follow-up, while those on ART also had lower hypertensive  
22 risk. Results for the full eligible sample are presented in online supplemental table 1.  
23  
24  
25  
26  
27  
28  
29  
30  
31  
32  
33  
34  
35  
36  
37

38 Table 3 shows the multivariable-adjusted results from the full Poisson regression excluding  
39 HIV status for those completing both studies (see online supplemental table 2 for the full  
40 eligible sample results). Older ages (e.g., ages 60-69 aIRR: 2.4 95% CI: 1.463-3.938), being  
41 employed (aIRR: 1.579 95% CI: 1.071-2.329), and having a high waist circumference (aIRR:  
42 1.557 95% CI: 1.074-2.259) were associated with higher risk of incident hypertension in  
43 2015. Those engaging in high levels of physical activity had an approximately 43% lower  
44 risk of incident hypertension, although the 95% CI overlapped with the null value of 1 (95%  
45 CI: 0.319-1.018)  
46  
47  
48  
49  
50  
51  
52  
53  
54  
55  
56  
57  
58  
59  
60

1  
2  
3 Table 4 shows the same multivariable-adjusted Poisson model as Table 3 including HIV  
4 status, with similar results to those risk factors from the model without HIV status. The  
5 results for high waist circumference were in the same direction but the 95% CI overlapped  
6 with the null value of 1. Those who were HIV-positive and not on ART had an approximately  
7 52% lower risk of incident hypertension compared to those HIV-negative at baseline (95% CI  
8 0.301-0.778), while those HIV-positive and on ART showed similar associations to those not  
9 on ART.  
10  
11  
12  
13  
14  
15  
16  
17  
18  
19  
20  
21

22 Results of the sensitivity analyses of alternate anthropometry measures showed similar  
23 associations for BMI as for waist circumference (online supplemental table 3). There were  
24 not enough cases of high waist-to-hip ratio to include in the models. A model examining an  
25 outcome based only on BP thresholds also showed similar associations to the original models  
26 (online supplemental table 4). For the competing risk model, high rates of missing data on  
27 HIV/ART status precluded including that indicator. Results omitting HIV/ART status at  
28 baseline are presented in online supplemental table 5, showing similar results to the full  
29 eligible sample (online supplemental table 2). Cause of death information according to broad  
30 cause groups is presented in online supplemental table 6.  
31  
32  
33  
34  
35  
36  
37  
38  
39  
40  
41  
42  
43  
44  
45

## 46 **DISCUSSION**

47 In 1998, South Africa had approximately 6.3 million adults with hypertension.<sup>42</sup> Now it is  
48 estimated to be close to 12 million, nearly doubling despite population growth of about 34%  
49 over the same time period, with prevalence increasing from 24% to over 40% in some  
50 populations.<sup>43</sup> Based on our finding of 8.37 per 100 person-years, we estimate that roughly  
51 1.4 million adults over the age of 40 will develop hypertension over the next five years.  
52  
53  
54  
55  
56  
57  
58  
59  
60 Given an increase of nearly 50% in the risk of ischemic heart disease and stroke death for

1  
2  
3 each 10 mmHg increase,<sup>44</sup> the results suggest both a significant increase in the number of  
4  
5 people in need of additional treatment, and premature mortality if not adequately controlled.  
6  
7

8  
9  
10 We found that 29% of middle-aged and older adults in our study developed hypertension  
11  
12 over a five-year period. Our results were similar to another study from South Africa  
13  
14 following individuals ages 30-plus over five years (2005-2010) who started with optimal  
15  
16 blood pressure. They found a relatively similar incidence of 24%<sup>27</sup> given the slightly younger  
17  
18 age range.  
19  
20

21  
22  
23 We showed that men have higher hypertension incidence rates in mid-life, while women had  
24  
25 higher rates at older ages. This is likely due at least in part to the smaller sample size of men  
26  
27 in our study. A potentially similar pattern was shown in a study in South Africa (2004-2016)  
28  
29 of patients initiating ART at 10 public sector clinics (9 urban, 1 rural) which included a wider  
30  
31 age range (ages 18-50-plus).<sup>24</sup> They found that men had higher hypertension incidence rates  
32  
33 at ages 18-39, while women had higher rates at ages 40-49 and 50-plus. Our finding may also  
34  
35 be due to greater employment for middle-aged men<sup>45</sup> and higher survival<sup>17 46</sup> or obesity<sup>47 48</sup>  
36  
37 among older women.  
38  
39  
40  
41  
42  
43  
44

45 In multivariable-adjusted models, we found that being employed and having a high waist  
46  
47 circumference at baseline were risk factors for incident hypertension. Another study in South  
48  
49 Africa also found that high waist circumference was a key risk factor, along with alcohol  
50  
51 intake.<sup>27</sup> While we showed no association with alcohol use, our sample also had low self-  
52  
53 reported use of alcohol, with 80% reporting not drinking in the past month, which may be  
54  
55 due to response bias.<sup>49</sup> Given the limited employment opportunities in our setting,<sup>28</sup> a higher  
56  
57 risk of hypertension amongst employed individuals may represent those more likely to be  
58  
59  
60

1  
2  
3 exposed to workplace-related stress and other behavioural factors such as diet<sup>50 51</sup> that may  
4  
5 differ from those not employed.  
6  
7  
8  
9

10 We found that being HIV-positive at baseline was associated with a lower risk of incident  
11 hypertension. This also aligns with an earlier study in South Africa that showed that being  
12 HIV-positive was inversely related to increased BP.<sup>27</sup> However, our results may be sensitive  
13  
14 to survivorship bias if those who died due to HIV/AIDS over the five-year period were also  
15 more likely to develop hypertension. Of the 71 individuals for whom mortality information is  
16 available, about 28% died due to HIV/AIDS or TB. If a substantial portion of those  
17 individuals developed hypertension this may affect our estimates of the association between  
18 HIV/ART status and risk of incident hypertension. Further, as we lacked information on  
19 HIV/ART status for many individuals in the eligible sample who did not complete the  
20 follow-up study, this may affect our estimates if those individuals were more likely to be  
21 HIV-positive.<sup>52</sup> A longer period of follow-up is needed to assess the effects of HIV and ART  
22 on hypertension and related cardiometabolic conditions. Longitudinal studies restricted to  
23 HIV-positive individuals have shown high hypertension incident rates over relatively short  
24 periods of follow-up and similar risk factors to the HIV-negative population.<sup>25 26</sup>  
25  
26  
27  
28  
29  
30  
31  
32  
33  
34  
35  
36  
37  
38  
39  
40  
41  
42  
43  
44

45 Our longitudinal findings are particularly important given the complex health transition  
46 occurring in South Africa, with a concomitant burden of infectious and noncommunicable  
47 diseases.<sup>17 23 29 47</sup> A study from the same community as our study demonstrated a high and  
48 increasing burden of stroke morbidity and mortality.<sup>53</sup> While our findings are consistent with  
49 hypertension-related risk factors found in other regions, population-specific studies such as  
50 ours are important to contextualize the epidemiological findings from elsewhere and inform  
51 local prevention and treatment strategies.<sup>14</sup> They also provide an opportunity to understand  
52  
53  
54  
55  
56  
57  
58  
59  
60

1  
2  
3 the interaction between cardiometabolic and infectious diseases such as HIV. A longer period  
4  
5 of follow-up, which will be possible as future waves of the study are completed, will permit a  
6  
7 greater understanding of the interplay between hypertension, HIV, and treatment of both and  
8  
9 related conditions.  
10

11  
12  
13  
14 We acknowledge our study limitations. While our study is one of the few population-based,  
15  
16 longitudinal cohorts on hypertension incidence in Africa, the study comes from a defined  
17  
18 region in rural northeast South Africa. Additional studies are needed in other settings,  
19  
20 particularly given differences in exposures and differential risk factors in rural and urban  
21  
22 contexts. We include a wide range of potential risk factors based on existing studies. Other  
23  
24 factors, however, such as migration history, would be important to consider given the high  
25  
26 levels of circular labour migration in this setting and potential links of rural to urban  
27  
28 migration to increased blood pressure.<sup>54–57</sup> Other important factors to consider include  
29  
30 nutritional factors such as consumption of fruits and vegetables and salt intake. Further, food  
31  
32 insecurity is highly prevalent in this setting<sup>58</sup> and may lead to differential hypertension risk  
33  
34 due to dietary differences. Given the high level of missing data on HIV/ART status amongst  
35  
36 the eligible population who did not complete the follow-up study, we were unable to assess  
37  
38 the effect of HIV/ART in a competing risk framework. Our measure of ART status is also  
39  
40 based on self-report and may be subject to response bias, as well as factors related to HIV  
41  
42 awareness such as engagement with health services.<sup>59</sup> Our self-reported measures may also  
43  
44 be subject to social desirability and recall bias.  
45  
46  
47  
48  
49  
50  
51

52  
53 Over a period of five years, 29% of individuals developed hypertension in a population-based  
54  
55 cohort of individuals ages 40 and older given an incidence rate of 8.374 per 100 person-years.  
56  
57 Abdominal obesity was one of the most consistent risk factors. Being employed was also a  
58  
59  
60



1  
2  
3 predictor of incident hypertension. As South Africa continues to undergo a complex health  
4 and epidemiological transition, continued longitudinal follow-up is needed to understand the  
5 complex interplay of noncommunicable and infectious diseases, along with their underlying  
6 and modifiable risk factors. In response to the call for longitudinal studies from sub-Saharan  
7 Africa on hypertension risk, this study contributes to the evidence base that can help inform  
8 and target public health strategies to reduce preventable morbidity and mortality.  
9  
10  
11  
12  
13  
14  
15  
16  
17  
18  
19  
20  
21  
22  
23  
24  
25  
26  
27  
28  
29  
30  
31  
32  
33  
34  
35  
36  
37  
38  
39  
40  
41  
42  
43  
44  
45  
46  
47  
48  
49  
50  
51  
52  
53  
54  
55  
56  
57  
58  
59  
60

## Acknowledgements

The authors thank the study participants and all those involved in the successful field operations in Ha Nakekela, HAALSI and the Agincourt HDSS.

**Contributions:** BH wrote the first draft and designed and completed the statistical analyses. FXG, BH, TG and SMT conceptualized the work. FXG, NA, CWK, and SMT designed and implemented the baseline study. TG, FXG, CWK, and SMT designed and implemented the follow-up study. TG, NA, SAM, CWK, SMT, and FXG revised the manuscript for important intellectual content and contributed to interpretation of the data. All authors read and approved the final manuscript.

**Funding:** The Ha Nakekela study was supported by the National Institutes of Health [R24 AG032112-05] and the William and Flora Hewlett Foundation 2009-4060 African Population Research and Training Program. Data analysis for this study, part of the HIV after 40 in rural South Africa project, was funded by the US National Institute on Aging [R01 AG049634] and the University of Colorado, Innovative Seed Grant [not applicable].

HAALSI was supported by the U.S. National Institute on Aging [P01AG041710; 1R01AG051144-01; 3U54HG006938-03S1].

The MRC/Wits Rural Public Health and Health Transitions Research Unit and Agincourt Health and Socio-Demographic Surveillance System, a node of the South African Population Research Infrastructure Network (SAPRIN), is supported by the Department of Science and Innovation [not applicable], the University of the Witwatersrand [not applicable], and the

1  
2  
3 Medical Research Council, South Africa [not applicable], and previously the Wellcome  
4  
5 Trust, UK (Grants 058893/Z/99/A; 069683/Z/02/Z; 085477/Z/08/Z; 085477/B/08/Z).  
6  
7  
8  
9

10 **Competing interests:** None declared.  
11  
12  
13

14 **Ethics approval:** Ethical clearance for both surveys and the HDSS were obtained from the  
15 University of the Witwatersrand Human Research Ethics Committee (Medical) [M10458 and  
16 M141159] and the Mpumalanga Provincial Research and Ethics Committee. The baseline  
17 study also received ethical approval from the Institutional Review Board of the University of  
18 Colorado – Boulder [11-0549] and the follow-up study from the Harvard TH Chan School of  
19 Public Health, Office of Human Research Administration [C13-1608-02]. Written consent to  
20 participate was obtained for all participants in the baseline study. Each respondent in the  
21 follow-up study also provided written, informed consent (or by a proxy, when needed).  
22  
23  
24  
25  
26  
27  
28  
29  
30  
31  
32  
33  
34

35 **Data sharing:** The datasets generated and/or analysed for the follow-up study are available at  
36 the Harvard Center for Population and Development Studies (HCPDS) program website:  
37 [www.haalsi.org](http://www.haalsi.org). The data supporting the findings of this study are available from the  
38 corresponding author on reasonable request.  
39  
40  
41  
42  
43  
44  
45  
46  
47  
48  
49  
50  
51  
52  
53  
54  
55  
56  
57  
58  
59  
60

## REFERENCES

1. Lim, S. S., T. Vos, A. D. Flaxman, G. Danaei, K. Shibuya, H. Adair-Rohani, M. A. AlMazroa, M. Amann, H. R. Anderson, and K. G. Andrews. A comparative risk assessment of burden of disease and injury attributable to 67 risk factors and risk factor clusters in 21 regions, 1990-2010: a systematic analysis for the Global Burden of Disease Study 2010. *The Lancet* 2013;380:2224-2260.
2. Ibrahim, M. M., and A. Damasceno. Hypertension in developing countries. *The Lancet* 2012;380:611-619.
3. Bosu, W. K., S. T. Reilly, J. M. K. Aheto, and E. Zucchelli. Hypertension in older adults in Africa: A systematic review and meta-analysis. *PloS One* 2019;14:e0214934.
4. Guwatudde, D., J. Nankya-Mutyoba, R. Kalyesubula, C. Laurence, C. Adebamowo, I. Ajayi, F. Bajunirwe, M. Njelekela, F. S. Chiwanga, T. Reid, J. Volmink, H. O. Adami, M. D. Holmes, and S. Dalal. The burden of hypertension in sub-Saharan Africa: a four-country cross sectional study. *BMC Public Health* 2015;15:1211.
5. Kaze, A. D., A. E. Schutte, S. Erqou, A. P. Kengne, and J. B. Echouffo-Tcheugui. Prevalence of hypertension in older people in Africa. *Journal of Hypertension* 2017;35:1345-1352.
6. Sarki, A. M., C. U. Nduka, S. Stranges, N. B. Kandala, and O. A. Uthman. Prevalence of Hypertension in Low- and Middle-Income Countries: A Systematic Review and Meta-Analysis. *Medicine* 2015;94:e1959.
7. Twagirumukiza, M., D. De Bacquer, J. G. Kips, G. de Backer, R. V. Stichele, and L. M. Van Bortel. Current and projected prevalence of arterial hypertension in sub-Saharan Africa by sex, age and habitat: an estimate from population studies. *J Hypertens* 2011;29:1243-1252.
8. Lloyd-Sherlock, P., J. Beard, N. Minicuci, S. Ebrahim, and S. Chatterji. Hypertension among older adults in low- and middle-income countries: prevalence, awareness and control. *International Journal of Epidemiology* 2014;43:116-128.
9. Sudharsanan, N., and P. Geldsetzer. Impact of Coming Demographic Changes on the Number of Adults in Need of Care for Hypertension in Brazil, China, India, Indonesia, Mexico, and South Africa. *Hypertension* 2019;73:770-776.
10. Addo, J., L. Smeeth, and D. A. Leon. Hypertension in sub-saharan Africa: a systematic review. *Hypertension* 2007;50:1012-1018.
11. Gómez-Olivé, F. X., S. A. Ali, F. Made, C. Kyobutungi, E. Nonterah, L. Micklesfield, M. Alberts, and R. Boua. Stark Regional and Sex Differences in the Prevalence and Awareness of Hypertension: An H3Africa AWI-Gen Study Across 6 Sites in Sub-Saharan Africa. *Global Heart* 2017
12. Ataklte, F., S. Erqou, S. Kaptoge, B. Taye, J. B. Echouffo-Tcheugui, and A. P. Kengne. Burden of undiagnosed hypertension in sub-saharan Africa: a systematic review and meta-analysis. *Hypertension* 2015;65:291-298.
13. Jardim, T. V., S. Reiger, S. Abrahams-Gessel, F. X. Gomez-Olive, R. G. Wagner, A. Wade, T. W. Barnighausen, J. Salomon, S. Tollman, and T. A. Gaziano. Hypertension management in a population of older adults in rural South Africa. *Journal of Hypertension* 2017;35:1283-1289.
14. Kengne, A. P., L. M. Ntyintyane, and B. M. Mayosi. A systematic overview of prospective cohort studies of cardiovascular disease in sub-Saharan Africa. *Cardiovascular Journal of Africa* 2012;23:103-112.

15. Holmes, M. D., S. Dalal, J. Volmink, C. A. Adebamowo, M. Njelekela, W. W. Fawzi, W. C. Willett, and H. O. Adami. Non-communicable diseases in sub-Saharan Africa: the case for cohort studies. *PLoS Med* 2010;7:e1000244.
16. Herbst, A. J., G. S. Cooke, T. Bärnighausen, A. KanyKany, F. Tanser, and M. Newell. Adult mortality and antiretroviral treatment roll-out in rural KwaZulu-Natal, South Africa. *Bulletin of the World Health Organization* 2009;87:754-762.
17. Kabudula, C. W., B. Houle, M. A. Collinson, K. Kahn, F. X. Gómez-Olivé, S. J. Clark, and S. Tollman. Progression of the epidemiological transition in a rural South African setting: findings from population surveillance in Agincourt, 1993-2013. *BMC Public Health* 2017;17:424.
18. Vollmer, S., K. Harttgen, T. Alfvén, J. Padayachy, P. Ghys, and T. Bärnighausen. The HIV epidemic in sub-Saharan Africa is aging: Evidence from the Demographic and Health Surveys in sub-Saharan Africa. *AIDS Behav* 2016;21:101-113.
19. Anand, A. R., G. Rachel, and D. Parthasarathy. HIV proteins and endothelial dysfunction: Implications in cardiovascular disease. *Front Cardiovasc Med* 2018;5:185.
20. Grinspoon, S., and A. Carr. Cardiovascular risk and body-fat abnormalities in HIV-infected adults. *New England Journal of Medicine* 2005;352:48-62.
21. Dillon, D. G. Association of HIV and ART with cardiometabolic traits in sub-Saharan Africa: a systematic review and meta-analysis. *International Journal of Epidemiology* 2013;42:1754-1771.
22. Rigaud, A.-S., and B. Forette. Hypertension in older adults. *Journal of Gerontology* 2001;56A:M217-M225.
23. Mayosi, B. M., A. J. Flisher, U. G. Lalloo, F. Sitas, S. M. Tollman, and D. Bradshaw. The burden of non-communicable diseases in South Africa. *Lancet* 2009;374:934-947.
24. Brennan, A. T., L. Jamieson, N. J. Crowther, M. P. Fox, J. A. George, K. M. Berry, A. Stokes, M. Maskew, I. Sanne, and L. Long. Prevalence, incidence, predictors, treatment, and control of hypertension among HIV-positive adults on antiretroviral treatment in public sector treatment programs in South Africa. *PloS One* 2018;13:e0204020.
25. Okello, S., M. Kanyesigye, W. R. Muyindike, B. H. Annex, P. W. Hunt, S. Haneuse, and M. J. Siedner. Incidence and predictors of hypertension in adults with HIV-initiating antiretroviral therapy in south-western Uganda. *J Hypertens* 2015;33:2039-2045.
26. Rodriguez-Arbolí, E., K. Mwamelo, A. V. Kalinjuma, H. Furrer, C. Hatz, M. Tanner, M. Battegay, E. Letang, and S. G. KIULARCO. Incidence and risk factors for hypertension among HIV patients in rural Tanzania - A prospective cohort study. *PLoS One* 2017;12:e0172089.
27. Schutte, A. E., R. Schutte, H. W. Huisman, J. M. van Rooyen, C. M. Fourie, N. T. Malan, L. Malan, C. M. Mels, W. Smith, S. J. Moss, G. W. Towers, H. S. Kruger, E. Wentzel-Viljoen, H. H. Vorster, and A. Kruger. Are behavioural risk factors to be blamed for the conversion from optimal blood pressure to hypertensive status in Black South Africans? A 5-year prospective study. *International Journal of Epidemiology* 2012;41:1114-1123.
28. Kahn, K., M. A. Collinson, F. X. Gomez-Olive, O. Mokoena, R. Twine, P. Mee, S. A. Afolabi, B. D. Clark, C. W. Kabudula, A. Khosa, S. Khoza, M. G. Shabangu, B. Silaule, J. B. Tibane, R. G. Wagner, M. L. Garenne, S. J. Clark, and S. M. Tollman. Profile: Agincourt Health and Socio-demographic Surveillance System. *Int J Epidemiol* 2012;41:988-1001.

- 1
  - 2
  - 3
  - 4
  - 5
  - 6
  - 7
  - 8
  - 9
  - 10
  - 11
  - 12
  - 13
  - 14
  - 15
  - 16
  - 17
  - 18
  - 19
  - 20
  - 21
  - 22
  - 23
  - 24
  - 25
  - 26
  - 27
  - 28
  - 29
  - 30
  - 31
  - 32
  - 33
  - 34
  - 35
  - 36
  - 37
  - 38
  - 39
  - 40
  - 41
  - 42
  - 43
  - 44
  - 45
  - 46
  - 47
  - 48
  - 49
  - 50
  - 51
  - 52
  - 53
  - 54
  - 55
  - 56
  - 57
  - 58
  - 59
  - 60
29. Gómez-Olivé, F. X., N. Angotti, B. Houle, K. Klipstein-Grobusch, C. Kabudula, J. Menken, J. Williams, S. Tollman, and S. J. Clark. Prevalence of HIV among those 15 and older in rural South Africa. *AIDS Care* 2013;25:1122-1128.
30. Gómez-Olivé, F. X., L. Montana, R. G. Wagner, C. W. Kabudula, J. K. Rohr, K. Kahn, T. Bärnighausen, M. Collinson, D. Canning, T. Gaziano, J. A. Salomon, C. F. Payne, A. Wade, S. M. Tollman, and L. Berkman. Cohort Profile: Health and Ageing in Africa: a Longitudinal Study of an INDEPTH Community in South Africa (HAALSI). *International Journal of Epidemiology* 2018;47:689-690j.
31. Altunkan, S., K. Öztas, and E. Altunkan. Validation of the Omron 637IT wrist blood pressure measuring device with a position sensor according to the International Protocol in adults and obese adults. *Blood Pressure Monitoring* 2006;11:79-85.
32. Saladini, F., E. Benetti, and P. Palatini. Accuracy of the visomat handy wrist blood pressure measuring device according to the International Protocol. *Blood Press Monit* 2010;15:281-284.
33. Omboni, S., I. Riva, A. Giglio, G. Caldara, A. Groppelli, and G. Parati. Validation of the Omron M5-I, R5-I and HEM-907 automated blood pressure monitors in elderly individuals according to the International Protocol of the European Society of Hypertension. *Blood Pressure Monitoring* 2007;12:233-242.
34. Centers for Disease Control and Prevention (CDC). National Health and Nutrition Examination Survey: 1999-2000 Data Documentation, Codebook, and Frequencies. 2002
35. US Department of Health and Human Services. 2004. *The seventh report of the Joint National Committee on prevention, detection, evaluation, and treatment of high blood pressure*. National Heart, Lung, and Blood Institute (US), NIH Publication No. 04-5230.
36. World Health Organization. 2007. *Prevention of cardiovascular disease. Pocket guidelines for assessment and management of cardiovascular risk: (WHO/ISH cardiovascular risk prediction charts for the African region)*. World Health Organization, Geneva.
37. US Department of Health and Human Services. 2004. *The seventh report of the Joint National Committee on prevention, detection, evaluation, and treatment of high blood pressure*. National Heart, Lung, and Blood Institute (US),
38. Kabudula, C., B. Houle, M. A. Collinson, K. Kahn, S. Tollman, and S. Clark. Assessing changes in household socioeconomic status in rural South Africa, 2001-2013: a distributional analysis using household asset indicators. *Social Indicators Research* 2016;133:1047-1073.
39. Byass, P., D. Chandramohan, S. J. Clark, L. D'Ambruoso, E. Fottrell, W. J. Graham, A. J. Herbst, A. Hodgson, S. Hounton, K. Kahn, A. Krishnan, J. Leita, F. Odhiambo, O. A. Sankoh, and S. M. Tollman. Strengthening standardised interpretation of verbal autopsy data: the new InterVA-4 tool. *Glob Health Action* 2012;5:1-8.
40. StataCorp. 2017. *Stata Statistical Software: Release 15*. StataCorp, LP, College Station, TX.
41. Fine, J. P., and R. J. Gray. A Proportional Hazards Model for the Subdistribution of a Competing Risk. *Journal of the American Statistical Association* 1999;94:496-509.
42. Steyn, K., T. A. Gaziano, D. Bradshaw, R. Laubscher, and J. Fourie. Hypertension in South African adults: results from the Demographic and Health Survey, 1998. *Journal of Hypertension* 2001;19:1717-1725.
43. Ntuli, S. T., E. Maimela, M. Alberts, S. Choma, and S. Dikotope. Prevalence and associated risk factors of hypertension amongst adults in a rural community of Limpopo Province, South Africa. *Afr J Prim Health Care Fam Med* 2015;7:847.



- 1
- 2
- 3
- 4 44. Chobanian, A. V., G. L. Bakris, H. R. Black, W. C.ushman, L. A. Green, J. L. Izzo Jr,
- 5 D. W. Jones, B. J. Materson, S. Oparil, and J. T. Wright Jr. The seventh report of the
- 6 joint national committee on prevention, detection, evaluation, and treatment of high
- 7 blood pressure: the JNC 7 report. *JAMA* 2003;289:2560-2571.
- 8 45. Blalock, C. L. Labor migration and employment in post-apartheid rural South Africa.
- 9 *Department of Sociology* 2014;Doctor of Philosophy
- 10 46. Houle, B., S. J. Clark, F. X. Gómez-Olivé, K. Kahn, and S. M. Tollman. The unfolding
- 11 counter-transition in rural South Africa: mortality and cause of death, 1994-2009. *PLoS*
- 12 *One* 2014;9:e100420.
- 13 47. Clark, S. J., F. X. Gómez-Olivé, B. Houle, M. Thorogood, K. Klipstein-Grobusch, N.
- 14 Angotti, C. Kabudula, J. Williams, J. Menken, and S. Tollman. Cardiometabolic disease
- 15 risk and HIV status in rural South Africa: establishing a baseline. *BMC Public Health*
- 16 2015;15:372.
- 17 48. Gaziano, T. A., S. Abrahams-Gessel, F. X. Gomez-Olive, A. Wade, N. J. Crowther, S.
- 18 Alam, J. Manne-Goehler, C. W. Kabudula, R. Wagner, J. Rohr, L. Montana, K. Kahn,
- 19 T. W. Bärnighausen, L. F. Berkman, and S. Tollman. Cardiometabolic risk in a
- 20 population of older adults with multiple co-morbidities in rural south africa: the
- 21 HAALSI (Health and Aging in Africa: longitudinal studies of INDEPTH communities)
- 22 study. *BMC Public Health* 2017;17:206.
- 23 49. Houle, B., N. Angotti, F. X. Gómez-Olivé, and S. J. Clark. Fieldworker effects on
- 24 substance use reporting in rural South Africa. *International Journal of Alcohol and*
- 25 *Drug Research* 2018;7:29-39.
- 26 50. Maredza, M., K. J. Hofman, and T. Tollman. A hidden menace: cardiovascular disease
- 27 in South Africa and the costs of an inadequate policy response: health policy and
- 28 cardiovascular disease. *SA Heart* 2011;8:48-57.
- 29 51. Feeley, A. B. B., K. Kahn, R. Twine, and S. A. Norris. Exploratory survey of informal
- 30 vendor-sold fast food in rural South Africa. *South African Journal of Clinical Nutrition*
- 31 2011;24:199-201.
- 32 52. Clark, S. J., and B. Houle. Validation, replication, and sensitivity testing of Heckman-
- 33 type selection models to adjust estimates of HIV prevalence. *PLoS One*
- 34 2014;9:e112563.
- 35 53. Maredza, M., M. Y. Bertram, and S. M. Tollman. Disease burden of stroke in rural
- 36 South Africa: an estimate of incidence, mortality and disability adjusted life years. *BMC*
- 37 *Neurol* 2015;15:54.
- 38 54. Collinson, M. A., M. J. White, P. Bocquier, S. T. McGarvey, S. A. Afolabi, S. J. Clark,
- 39 K. Kahn, and S. M. Tollman. Migration and the epidemiological transition: insights
- 40 from the Agincourt sub-district of northeast South Africa. *Global Health Action*
- 41 2014;7:23514.
- 42 55. Pheiffer, C. F., S. T. McGarvey, C. Ginsburg, M. Collinson, F. X. Gómez-Olivé, S.
- 43 Tollman, and M. J. White. Dimensions of internal migration and their relationship to
- 44 blood pressure in South Africa. *J Biosoc Sci* 2019:1-16.
- 45 56. Poulter, N. R., K. T. Khaw, B. E. Hopwood, M. Mugambi, W. S. Peart, G. Rose, and P.
- 46 S. Sever. The Kenyan Luo migration study: observations on the initiation of a rise in
- 47 blood pressure. *BMJ* 1990;300:967-972.
- 48 57. Steyn, K., D. Bradshaw, R. Norman, and R. Laubscher. Determinants and treatment of
- 49 hypertension in South Africans: the first Demographic and Health Survey. *South*
- 50 *African Medical Journal* 2008;98:376-380.
- 51 58. Hunter, L. M., W. Twine, and L. Patterson. "Locusts are now our beef": adult mortality
- 52 and household dietary use of local environmental resources in rural South Africa. *Scand*
- 53 *J Public Health Suppl* 2007;69:165-174.
- 54
- 55
- 56
- 57
- 58
- 59
- 60

- 1  
2  
3 59. Manne-Goehler, J., L. Montana, F. X. Gómez-Olivé, J. Rohr, G. Harling, R. G. Wagner,  
4 A. Wade, C. W. Kabudula, P. Geldsetzer, K. Kahn, S. Tollman, L. F. Berkman, T. W.  
5 Bärnighausen, and T. A. Gaziano. The ART advantage: healthcare utilization for  
6 diabetes and hypertension in rural South Africa. *JAIDS Journal of Acquired Immune*  
7 *Deficiency Syndromes* 2017;75:561-567.  
8  
9  
10  
11  
12  
13  
14  
15  
16  
17  
18  
19  
20  
21  
22  
23  
24  
25  
26  
27  
28  
29  
30  
31  
32  
33  
34  
35  
36  
37  
38  
39  
40  
41  
42  
43  
44  
45  
46  
47  
48  
49  
50  
51  
52  
53  
54  
55  
56  
57  
58  
59  
60

For peer review only



1  
2  
3 **FIGURE CAPTIONS**  
4

5 **Figure 1.** Participant flowchart.  
6

7  
8 **Figure 2.** Proportion of participants with incident hypertension, by age and gender, 2015.  
9  
10  
11  
12  
13  
14  
15  
16  
17  
18  
19  
20  
21  
22  
23  
24  
25  
26  
27  
28  
29  
30  
31  
32  
33  
34  
35  
36  
37  
38  
39  
40  
41  
42  
43  
44  
45  
46  
47  
48  
49  
50  
51  
52  
53  
54  
55  
56  
57  
58  
59  
60

For peer review only

**Table 1.** Sample characteristics at baseline (2010), by study participation in 2015 for eligible individuals (n=977).

|                                      | Lost to follow-up (n=301) |        | Completed 2015 (n=676) |        | p-value | Total (n=977) |        |
|--------------------------------------|---------------------------|--------|------------------------|--------|---------|---------------|--------|
|                                      | n                         | %      | n                      | %      |         | n             | %      |
| <b>Gender</b>                        |                           |        |                        |        |         |               |        |
| Male                                 | 140                       | (46.5) | 239                    | (35.4) | 0.001   | 379           | (38.8) |
| Female                               | 161                       | (53.5) | 437                    | (64.6) |         | 598           | (61.2) |
| <b>Age groups</b>                    |                           |        |                        |        |         |               |        |
| 35-44                                | 130                       | (43.2) | 227                    | (33.6) | 0.003   | 357           | (36.5) |
| 45-54                                | 71                        | (23.6) | 180                    | (26.6) |         | 251           | (25.7) |
| 55-64                                | 34                        | (11.3) | 126                    | (18.6) |         | 160           | (16.4) |
| 65-74                                | 29                        | (9.6)  | 81                     | (12.0) |         | 110           | (11.3) |
| 75+                                  | 37                        | (12.3) | 62                     | (9.2)  |         | 99            | (10.1) |
| <b>Education</b>                     |                           |        |                        |        |         |               |        |
| None                                 | 40                        | (34.2) | 277                    | (41.0) | 0.018   | 317           | (40.0) |
| Less than secondary                  | 54                        | (46.2) | 327                    | (48.4) |         | 381           | (48.0) |
| Secondary or more                    | 23                        | (19.7) | 72                     | (10.7) |         | 95            | (12.0) |
| <b>Union status</b>                  |                           |        |                        |        |         |               |        |
| Not in union                         | 166                       | (55.1) | 302                    | (44.7) | 0.002   | 468           | (47.9) |
| Formal/informal union                | 135                       | (44.9) | 374                    | (55.3) |         | 509           | (52.1) |
| <b>SES<sup>a</sup></b>               |                           |        |                        |        |         |               |        |
| Low                                  | 130                       | (43.2) | 253                    | (37.7) | 0.258   | 383           | (39.4) |
| Middle                               | 86                        | (28.6) | 216                    | (32.2) |         | 302           | (31.1) |
| High                                 | 85                        | (28.2) | 202                    | (30.1) |         | 287           | (29.5) |
| <b>Employment status</b>             |                           |        |                        |        |         |               |        |
| Not employed                         | 80                        | (68.4) | 498                    | (74.1) | 0.196   | 578           | (73.3) |
| Employed                             | 37                        | (31.6) | 174                    | (25.9) |         | 211           | (26.7) |
| <b>Smoking history</b>               |                           |        |                        |        |         |               |        |
| Never                                | 236                       | (78.4) | 548                    | (81.1) | 0.206   | 784           | (80.2) |
| Prior                                | 18                        | (6.0)  | 49                     | (7.2)  |         | 67            | (6.9)  |
| Current                              | 47                        | (15.6) | 79                     | (11.7) |         | 126           | (12.9) |
| <b>Alcohol use</b>                   |                           |        |                        |        |         |               |        |
| Not in past 30 days                  | 235                       | (78.1) | 544                    | (80.5) | 0.686   | 779           | (79.7) |
| Less than weekly                     | 24                        | (8.0)  | 47                     | (7.0)  |         | 71            | (7.3)  |
| Weekly                               | 42                        | (14.0) | 85                     | (12.6) |         | 127           | (13.0) |
| <b>Physical activity<sup>b</sup></b> |                           |        |                        |        |         |               |        |
| Low                                  | 27                        | (9.4)  | 40                     | (6.0)  | 0.128   | 67            | (7.0)  |

|                                       |     |        |     |        |       |            |
|---------------------------------------|-----|--------|-----|--------|-------|------------|
| Moderate                              | 80  | (27.9) | 209 | (31.3) | 289   | (30.3)     |
| High                                  | 180 | (62.7) | 419 | (62.7) | 599   | (62.7)     |
| High waist circumference <sup>c</sup> |     |        |     |        |       |            |
| No                                    | 205 | (72.7) | 430 | (65.8) | 0.04  | 635 (67.9) |
| Yes                                   | 77  | (27.3) | 223 | (34.2) |       | 300 (32.1) |
| Diabetes <sup>d</sup>                 |     |        |     |        |       |            |
| No                                    | 293 | (98.0) | 655 | (97.2) | 0.46  | 948 (97.4) |
| Yes                                   | 6   | (2.0)  | 19  | (2.8)  |       | 25 (2.6)   |
| High triglycerides <sup>e</sup>       |     |        |     |        |       |            |
| No                                    | 213 | (72.7) | 479 | (73.5) | 0.805 | 692 (73.2) |
| Yes                                   | 80  | (27.3) | 173 | (26.5) |       | 253 (26.8) |

HIV/ART is not included given missing values (n=297) for the vast majority of those lost to follow-up.

<sup>a</sup> Based on a household asset index score.

<sup>b</sup> Based on the International Physical Activity Questionnaire (IPAQ).

<sup>c</sup> Greater than 102cm for men and 88cm for women.

<sup>d</sup> Blood glucose greater than or equal to 11.1.

<sup>e</sup> Greater than or equal to 1.7 mmol/l.

**Table 2.** Hypertension incidence rates and incidence rate ratios per 100 person-years over 5 years of follow-up (2010-2015), by sociodemographic, health and behavioural factors among those completing both time points.

| Value                          | Events | PYRS | IR     | 95% CI |        | IRR   | 95% CI |       | p-value |
|--------------------------------|--------|------|--------|--------|--------|-------|--------|-------|---------|
|                                |        |      |        | Lower  | Upper  |       | Lower  | Upper |         |
| Overall                        | 193    | 2311 | 8.374  | 7.242  | 9.721  |       |        |       |         |
| Gender                         |        |      |        |        |        |       |        |       |         |
| Male                           | 74     | 815  | 9.097  | 7.266  | 11.496 | 1     |        |       |         |
| Female                         | 119    | 1496 | 8.159  | 6.832  | 9.804  | 0.897 | 0.67   | 1.2   | 0.463   |
| Age groups                     |        |      |        |        |        |       |        |       |         |
| 40-49                          | 56     | 975  | 5.04   | 3.837  | 6.73   | 1     |        |       |         |
| 50-59                          | 47     | 556  | 8.897  | 6.667  | 12.077 | 1.765 | 1.177  | 2.647 | 0.006   |
| 60-69                          | 42     | 399  | 11.104 | 8.282  | 15.14  | 2.203 | 1.464  | 3.315 | <0.001  |
| 70-79                          | 28     | 239  | 11.875 | 8.285  | 17.436 | 2.356 | 1.486  | 3.735 | <0.001  |
| 80+                            | 20     | 141  | 16.197 | 10.647 | 25.379 | 3.213 | 1.931  | 5.348 | <0.001  |
| Education                      |        |      |        |        |        |       |        |       |         |
| None                           | 85     | 986  | 9.256  | 7.491  | 11.536 | 1     |        |       |         |
| Less than secondary            | 92     | 1090 | 8.21   | 6.645  | 10.229 | 0.887 | 0.655  | 1.202 | 0.439   |
| Secondary or more              | 16     | 235  | 5.318  | 3.112  | 9.652  | 0.575 | 0.319  | 1.034 | 0.065   |
| Union status                   |        |      |        |        |        |       |        |       |         |
| Not in union                   | 91     | 1034 | 8.613  | 6.983  | 10.709 | 1     |        |       |         |
| Formal/informal union          | 102    | 1277 | 8.165  | 6.685  | 10.051 | 0.948 | 0.706  | 1.273 | 0.722   |
| SES <sup>a</sup>               |        |      |        |        |        |       |        |       |         |
| Low                            | 68     | 867  | 8.064  | 6.328  | 10.397 | 1     |        |       |         |
| Middle                         | 64     | 736  | 8.715  | 6.798  | 11.305 | 1.081 | 0.759  | 1.539 | 0.667   |
| High                           | 60     | 689  | 8.389  | 6.449  | 11.056 | 1.04  | 0.723  | 1.497 | 0.831   |
| Employment status              |        |      |        |        |        |       |        |       |         |
| Not employed                   | 144    | 1701 | 8.336  | 7.048  | 9.911  | 1     |        |       |         |
| Employed                       | 48     | 595  | 8.511  | 6.375  | 11.557 | 1.021 | 0.726  | 1.435 | 0.905   |
| Smoking history                |        |      |        |        |        |       |        |       |         |
| Never                          | 163    | 1861 | 8.644  | 7.392  | 10.155 | 1     |        |       |         |
| Prior                          | 11     | 171  | 6.356  | 3.501  | 12.447 | 0.735 | 0.391  | 1.381 | 0.339   |
| Current                        | 19     | 279  | 6.715  | 4.293  | 10.956 | 0.777 | 0.478  | 1.262 | 0.308   |
| Alcohol use                    |        |      |        |        |        |       |        |       |         |
| Not in past 30 days            | 153    | 1852 | 8.416  | 7.167  | 9.931  | 1     |        |       |         |
| Less than weekly               | 10     | 167  | 5.459  | 2.879  | 11.284 | 0.649 | 0.331  | 1.272 | 0.208   |
| Weekly                         | 30     | 292  | 9.789  | 6.708  | 14.649 | 1.163 | 0.766  | 1.765 | 0.478   |
| Physical activity <sup>b</sup> |        |      |        |        |        |       |        |       |         |

|                                       |     |      |        |       |        |       |       |       |       |  |
|---------------------------------------|-----|------|--------|-------|--------|-------|-------|-------|-------|--|
| Low                                   | 20  | 122  | 15.468 | 9.85  | 24.91  | 1     |       |       |       |  |
| Moderate                              | 71  | 687  | 10.641 | 8.402 | 13.61  | 0.688 | 0.412 | 1.149 | 0.153 |  |
| High                                  | 100 | 1471 | 6.98   | 5.718 | 8.59   | 0.451 | 0.275 | 0.742 | 0.002 |  |
| High waist circumference <sup>c</sup> |     |      |        |       |        |       |       |       |       |  |
| No                                    | 104 | 1512 | 6.519  | 5.326 | 8.046  | 1     |       |       |       |  |
| Yes                                   | 78  | 735  | 10.571 | 8.483 | 13.283 | 1.621 | 1.197 | 2.196 | 0.002 |  |
| Diabetes <sup>d</sup>                 |     |      |        |       |        |       |       |       |       |  |
| No                                    | 186 | 2240 | 8.298  | 7.156 | 9.662  | 1     |       |       |       |  |
| Yes                                   | 6   | 64   | 10.06  | 4.451 | 26.006 | 1.212 | 0.529 | 2.778 | 0.649 |  |
| High triglycerides <sup>e</sup>       |     |      |        |       |        |       |       |       |       |  |
| No                                    | 122 | 1660 | 7.262  | 6.049 | 8.775  | 1     |       |       |       |  |
| Yes                                   | 59  | 575  | 10.59  | 8.177 | 13.88  | 1.458 | 1.057 | 2.012 | 0.022 |  |
| HIV and ART status                    |     |      |        |       |        |       |       |       |       |  |
| Negative                              | 155 | 1514 | 10.452 | 8.909 | 12.318 | 1     |       |       |       |  |
| Positive, not on ART                  | 25  | 486  | 4.749  | 3.15  | 7.439  | 0.454 | 0.289 | 0.713 | 0.001 |  |
| Positive, on ART                      | 6   | 178  | 3.553  | 1.52  | 10.122 | 0.34  | 0.142 | 0.811 | 0.015 |  |

<sup>a</sup> Based on a household asset index score.

<sup>b</sup> Based on the International Physical Activity Questionnaire (IPAQ).

<sup>c</sup> Greater than 102cm for men and 88cm for women.

<sup>d</sup> Blood glucose greater than or equal to 11.1.

<sup>e</sup> Greater than or equal to 1.7 mmol/l.

**Table 3.** Multivariable Poisson regression of incident hypertension on sociodemographic, health and behavioural risk factors among those completing both time points (n=616).

|                                | aIRR  | 95% CI |       | p-value |
|--------------------------------|-------|--------|-------|---------|
|                                |       | Lower  | Upper |         |
| Gender                         |       |        |       |         |
| Male                           | 1     |        |       |         |
| Female                         | 0.818 | 0.512  | 1.305 | 0.399   |
| Age groups                     |       |        |       |         |
| 40-49                          | 1     |        |       |         |
| 50-59                          | 1.831 | 1.193  | 2.811 | 0.006   |
| 60-69                          | 2.4   | 1.463  | 3.938 | <0.001  |
| 70-79                          | 2.607 | 1.451  | 4.684 | <0.001  |
| 80+                            | 2.561 | 1.196  | 5.488 | <0.001  |
| Education                      |       |        |       |         |
| None                           | 1     |        |       |         |
| Less than secondary            | 1.061 | 0.732  | 1.537 | 0.755   |
| Secondary or more              | 0.741 | 0.372  | 1.478 | 0.395   |
| Union status                   |       |        |       |         |
| Not in union                   | 1     |        |       |         |
| Formal/informal union          | 1.023 | 0.724  | 1.445 | 0.899   |
| SES <sup>a</sup>               |       |        |       |         |
| Low                            | 1     |        |       |         |
| Middle                         | 1.068 | 0.715  | 1.593 | 0.749   |
| High                           | 0.915 | 0.59   | 1.42  | 0.693   |
| Employment status              |       |        |       |         |
| Not employed                   | 1     |        |       |         |
| Employed                       | 1.579 | 1.071  | 2.329 | 0.021   |
| Smoking history                |       |        |       |         |
| Never                          | 1     |        |       |         |
| Prior                          | 0.758 | 0.37   | 1.55  | 0.447   |
| Current                        | 0.709 | 0.373  | 1.349 | 0.295   |
| Alcohol use                    |       |        |       |         |
| Not in past 30 days            | 1     |        |       |         |
| Less than weekly               | 0.717 | 0.345  | 1.492 | 0.373   |
| Weekly                         | 1.07  | 0.652  | 1.755 | 0.789   |
| Physical activity <sup>b</sup> |       |        |       |         |
| Low                            | 1     |        |       |         |
| Moderate                       | 0.781 | 0.447  | 1.364 | 0.385   |

|                                       |       |       |       |       |
|---------------------------------------|-------|-------|-------|-------|
| High waist circumference <sup>c</sup> | 0.57  | 0.319 | 1.018 | 0.057 |
| No                                    | 1     |       |       |       |
| Yes                                   | 1.557 | 1.074 | 2.259 | 0.02  |
| Diabetes <sup>d</sup>                 |       |       |       |       |
| No                                    | 1     |       |       |       |
| Yes                                   | 0.932 | 0.399 | 2.178 | 0.87  |
| High triglycerides <sup>e</sup>       |       |       |       |       |
| No                                    | 1     |       |       |       |
| Yes                                   | 1.297 | 0.932 | 1.805 | 0.123 |

<sup>a</sup> Based on a household asset index score.

<sup>b</sup> Based on the International Physical Activity Questionnaire (IPAQ).

<sup>c</sup> Greater than 102cm for men and 88cm for women.

<sup>d</sup> Blood glucose greater than or equal to 11.1.

<sup>e</sup> Greater than or equal to 1.7 mmol/l.

**Table 4.** Multivariable Poisson regression of incident hypertension on sociodemographic, health and behavioural risk factors, and HIV and ART status among those completing both time points (n=581).

|                                | aIRR  | 95% CI |       | p-value |
|--------------------------------|-------|--------|-------|---------|
|                                |       | Lower  | Upper |         |
| Gender                         |       |        |       |         |
| Male                           | 1     |        |       |         |
| Female                         | 0.854 | 0.533  | 1.369 | 0.512   |
| Age groups                     |       |        |       |         |
| 40-49                          | 1     |        |       |         |
| 50-59                          | 1.846 | 1.183  | 2.879 | 0.007   |
| 60-69                          | 2.128 | 1.281  | 3.535 | 0.004   |
| 70-79                          | 2.339 | 1.256  | 4.356 | 0.007   |
| 80+                            | 2.139 | 0.978  | 4.676 | 0.057   |
| Education                      |       |        |       |         |
| None                           | 1     |        |       |         |
| Less than secondary            | 1.124 | 0.765  | 1.652 | 0.552   |
| Secondary or more              | 0.754 | 0.368  | 1.542 | 0.439   |
| Union status                   |       |        |       |         |
| Not in union                   | 1     |        |       |         |
| In union                       | 0.939 | 0.662  | 1.332 | 0.724   |
| SES <sup>a</sup>               |       |        |       |         |
| Low                            | 1     |        |       |         |
| Middle                         | 0.97  | 0.647  | 1.454 | 0.883   |
| High                           | 0.812 | 0.519  | 1.269 | 0.36    |
| Employment status              |       |        |       |         |
| Not employed                   | 1     |        |       |         |
| Employed                       | 1.604 | 1.064  | 2.419 | 0.024   |
| Smoking history                |       |        |       |         |
| Never                          | 1     |        |       |         |
| Prior                          | 0.727 | 0.34   | 1.554 | 0.411   |
| Current                        | 0.661 | 0.345  | 1.267 | 0.213   |
| Alcohol use                    |       |        |       |         |
| Not in past 30 days            | 1     |        |       |         |
| Less than weekly               | 0.751 | 0.358  | 1.574 | 0.448   |
| Weekly                         | 1.111 | 0.668  | 1.846 | 0.685   |
| Physical activity <sup>b</sup> |       |        |       |         |
| Low                            | 1     |        |       |         |
| Moderate                       | 0.77  | 0.434  | 1.365 | 0.371   |



|                                       |       |       |       |       |
|---------------------------------------|-------|-------|-------|-------|
| High                                  | 0.56  | 0.309 | 1.015 | 0.056 |
| High waist circumference <sup>c</sup> |       |       |       |       |
| No                                    | 1     |       |       |       |
| Yes                                   | 1.448 | 0.975 | 2.149 | 0.066 |
| Diabetes <sup>d</sup>                 |       |       |       |       |
| No                                    | 1     |       |       |       |
| Yes                                   | 0.907 | 0.392 | 2.102 | 0.82  |
| High triglycerides <sup>e</sup>       |       |       |       |       |
| No                                    | 1     |       |       |       |
| Yes                                   | 1.34  | 0.956 | 1.877 | 0.089 |
| HIV and ART status                    |       |       |       |       |
| Negative                              | 1     |       |       |       |
| Positive, not on ART                  | 0.484 | 0.301 | 0.778 | 0.003 |
| Positive, on ART                      | 0.462 | 0.197 | 1.082 | 0.075 |

<sup>a</sup> Based on a household asset index score.

<sup>b</sup> Based on the International Physical Activity Questionnaire (IPAQ).

<sup>c</sup> Greater than 102cm for men and 88cm for women.

<sup>d</sup> Blood glucose greater than or equal to 11.1.

<sup>e</sup> Greater than or equal to 1.7 mmol/l.

1  
2  
3  
4  
5  
6  
7  
8  
9  
10  
11  
12  
13  
14  
15  
16  
17  
18  
19  
20  
21  
22  
23  
24  
25  
26  
27  
28  
29  
30  
31  
32  
33  
34  
35  
36  
37  
38  
39  
40  
41  
42  
43  
44  
45  
46  
47  
48  
49  
50  
51  
52  
53  
54  
55  
56  
57  
58  
59  
60

**Supplementary Materials**

Online Supplemental Tables 1-6

For peer review only

1  
2  
3  
4  
5  
6  
7  
8  
9  
10  
11  
12  
13  
14  
15  
16  
17

Assessed for eligibility  
n = 1048

Eligible for analysis  
n = 977

Completed 2015 time point  
n = 676

*Ineligible (n = 71)*  
12 exited before aged 40  
- 1 died  
- 11 migrated  
59 unable to follow

*Lost to follow-up (n = 301)*  
75 died  
30 migrated  
15 interviewed, missing outcome  
22 refusals  
159 unable to follow

Normotensive  
n = 483

Hypertensive  
n = 193

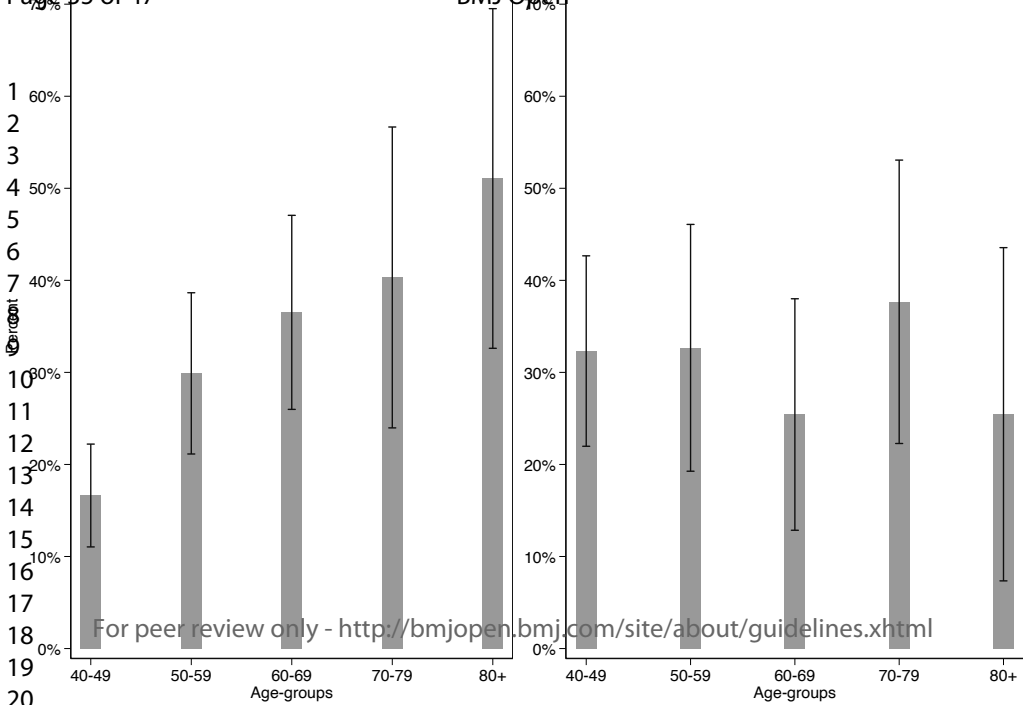

## SUPPLEMENTARY MATERIALS

**Supplemental Table 1.** Hypertension incidence rates and incidence rate ratios per 100 person-years over 5 years of follow-up (2010-2015), by sociodemographic, health and behavioral factors among the full eligible sample.

| Value                 | Events | PYRS | IR    | 95% CI |       | IRR   | 95% CI |       | p-value |
|-----------------------|--------|------|-------|--------|-------|-------|--------|-------|---------|
|                       |        |      |       | Lower  | Upper |       | Lower  | Upper |         |
| Overall               | 193    | 3187 | 4.579 | 3.911  | 5.361 |       |        |       |         |
| Gender                |        |      |       |        |       |       |        |       |         |
| Male                  | 74     | 1203 | 5.14  | 4.078  | 6.548 | 1     |        |       |         |
| Female                | 119    | 1984 | 4.408 | 3.641  | 5.369 | 0.858 | 0.632  | 1.163 | 0.323   |
| Age groups            |        |      |       |        |       |       |        |       |         |
| 40-49                 | 56     | 1418 | 2.795 | 2.117  | 3.755 | 1     |        |       |         |
| 50-59                 | 47     | 727  | 5.092 | 3.731  | 7.069 | 1.821 | 1.191  | 2.786 | 0.006   |
| 60-69                 | 42     | 514  | 5.478 | 3.876  | 7.848 | 1.96  | 1.25   | 3.073 | 0.003   |
| 70-79                 | 28     | 316  | 6.244 | 4.127  | 9.655 | 2.233 | 1.347  | 3.704 | 0.002   |
| 80+                   | 20     | 212  | 8.825 | 5.585  | 14.45 | 3.157 | 1.83   | 5.445 | <0.001  |
| Education             |        |      |       |        |       |       |        |       |         |
| None                  | 85     | 1134 | 6.774 | 5.397  | 8.574 | 1     |        |       |         |
| Less than secondary   | 92     | 1258 | 6.158 | 4.919  | 7.769 | 0.909 | 0.658  | 1.257 | 0.563   |
| Secondary or more     | 16     | 298  | 3.756 | 2.19   | 6.868 | 0.555 | 0.305  | 1.008 | 0.053   |
| Union status          |        |      |       |        |       |       |        |       |         |
| Not in union          | 91     | 1508 | 4.237 | 3.38   | 5.357 | 1     |        |       |         |
| Formal/informal union | 102    | 1679 | 4.928 | 3.984  | 6.144 | 1.163 | 0.849  | 1.593 | 0.347   |
| SES <sup>a</sup>      |        |      |       |        |       |       |        |       |         |
| Low                   | 68     | 1248 | 3.909 | 3.01   | 5.138 | 1     |        |       |         |
| Middle                | 64     | 975  | 5.612 | 4.325  | 7.372 | 1.436 | 0.986  | 2.089 | 0.059   |
| High                  | 60     | 946  | 4.464 | 3.362  | 6.007 | 1.142 | 0.772  | 1.69  | 0.507   |
| Employment status     |        |      |       |        |       |       |        |       |         |
| Not employed          | 144    | 1970 | 6.057 | 5.062  | 7.284 | 1     |        |       |         |
| Employed              | 48     | 706  | 6.503 | 4.83   | 8.911 | 1.074 | 0.754  | 1.529 | 0.694   |
| Smoking history       |        |      |       |        |       |       |        |       |         |
| Never                 | 163    | 2573 | 4.638 | 3.92   | 5.514 | 1     |        |       |         |
| Prior                 | 11     | 218  | 4.314 | 2.36   | 8.558 | 0.93  | 0.49   | 1.765 | 0.825   |
| Current               | 19     | 396  | 3.89  | 2.441  | 6.48  | 0.839 | 0.506  | 1.391 | 0.496   |
| Alcohol use           |        |      |       |        |       |       |        |       |         |
| Not in past 30 days   | 153    | 2546 | 4.522 | 3.805  | 5.401 | 1     |        |       |         |
| Less than weekly      | 10     | 227  | 3.557 | 1.875  | 7.414 | 0.787 | 0.399  | 1.549 | 0.488   |

|    |                                |     |      |        |       |        |       |       |       |       |
|----|--------------------------------|-----|------|--------|-------|--------|-------|-------|-------|-------|
| 1  |                                |     |      |        |       |        |       |       |       |       |
| 2  |                                |     |      |        |       |        |       |       |       |       |
| 3  | Weekly                         | 30  | 414  | 5.546  | 3.691 | 8.558  | 1.227 | 0.784 | 1.92  | 0.372 |
| 4  | Physical activity <sup>b</sup> |     |      |        |       |        |       |       |       |       |
| 5  | Low                            | 20  | 199  | 6.424  | 3.801 | 11.185 | 1     |       |       |       |
| 6  | Moderate                       | 71  | 913  | 6.323  | 4.899 | 8.246  | 0.984 | 0.548 | 1.769 | 0.958 |
| 7  | High                           | 100 | 2017 | 3.798  | 3.073 | 4.733  | 0.591 | 0.335 | 1.043 | 0.07  |
| 8  | High waist                     |     |      |        |       |        |       |       |       |       |
| 9  | circumference <sup>c</sup>     |     |      |        |       |        |       |       |       |       |
| 10 | No                             | 104 | 2106 | 3.629  | 2.936 | 4.523  | 1     |       |       |       |
| 11 | Yes                            | 78  | 974  | 5.796  | 4.544 | 7.455  | 1.597 | 1.151 | 2.215 | 0.005 |
| 12 | Diabetes <sup>d</sup>          |     |      |        |       |        |       |       |       |       |
| 13 | No                             | 186 | 3095 | 4.513  | 3.851 | 5.311  | 1     |       |       |       |
| 14 | Yes                            | 6   | 81   | 6.868  | 2.92  | 18.668 | 1.522 | 0.64  | 3.621 | 0.342 |
| 15 | High                           |     |      |        |       |        |       |       |       |       |
| 16 | triglycerides <sup>e</sup>     |     |      |        |       |        |       |       |       |       |
| 17 | No                             | 122 | 2269 | 4.084  | 3.367 | 4.989  | 1     |       |       |       |
| 18 | Yes                            | 59  | 817  | 5.344  | 4.014 | 7.203  | 1.309 | 0.922 | 1.857 | 0.132 |
| 19 | HIV and ART                    |     |      |        |       |        |       |       |       |       |
| 20 | status                         |     |      |        |       |        |       |       |       |       |
| 21 | Negative                       | 155 | 1522 | 10.254 | 8.726 | 12.104 | 1     |       |       |       |
| 22 | Positive, not on               |     |      |        |       |        |       |       |       |       |
| 23 | ART                            | 25  | 490  | 4.615  | 3.054 | 7.246  | 0.45  | 0.286 | 0.708 | 0.001 |
| 24 | Positive, on                   |     |      |        |       |        |       |       |       |       |
| 25 | ART                            | 6   | 178  | 3.553  | 1.52  | 10.122 | 0.346 | 0.145 | 0.827 | 0.017 |

<sup>a</sup> Based on a household asset index score.

<sup>b</sup> Based on the International Physical Activity Questionnaire (IPAQ).

<sup>c</sup> Greater than 102cm for men and 88cm for women.

<sup>d</sup> Blood glucose greater than or equal to 11.1.

<sup>e</sup> Greater than or equal to 1.7 mmol/l.

**Supplemental Table 2.** Multivariable Poisson regression of incident hypertension on sociodemographic, health and behavioral risk factors among the full eligible sample (n=721).

|                                      | aIRR  | 95% CI |       | p-value |
|--------------------------------------|-------|--------|-------|---------|
|                                      |       | Lower  | Upper |         |
| <b>Gender</b>                        |       |        |       |         |
| Male                                 | 1     |        |       |         |
| Female                               | 0.783 | 0.489  | 1.253 | 0.307   |
| <b>Age groups</b>                    |       |        |       |         |
| 40-49                                | 1     |        |       |         |
| 50-59                                | 1.871 | 1.205  | 2.905 | 0.005   |
| 60-69                                | 1.972 | 1.146  | 3.392 | 0.014   |
| 70-79                                | 2.183 | 1.149  | 4.146 | 0.017   |
| 80+                                  | 2.86  | 1.305  | 6.265 | 0.009   |
| <b>Education</b>                     |       |        |       |         |
| None                                 | 1     |        |       |         |
| Less than secondary                  | 0.947 | 0.647  | 1.387 | 0.781   |
| Secondary or more                    | 0.607 | 0.3    | 1.227 | 0.164   |
| <b>Union status</b>                  |       |        |       |         |
| Not in union                         | 1     |        |       |         |
| Formal/informal union                | 0.972 | 0.678  | 1.392 | 0.876   |
| <b>SES<sup>a</sup></b>               |       |        |       |         |
| Low                                  | 1     |        |       |         |
| Middle                               | 1.258 | 0.825  | 1.918 | 0.286   |
| High                                 | 0.963 | 0.599  | 1.55  | 0.878   |
| <b>Employment status</b>             |       |        |       |         |
| Not employed                         | 1     |        |       |         |
| Employed                             | 1.814 | 1.195  | 2.752 | 0.005   |
| <b>Smoking history</b>               |       |        |       |         |
| Never                                | 1     |        |       |         |
| Prior                                | 0.802 | 0.381  | 1.688 | 0.562   |
| Current                              | 0.71  | 0.362  | 1.393 | 0.32    |
| <b>Alcohol use</b>                   |       |        |       |         |
| Not in past 30 days                  | 1     |        |       |         |
| Less than weekly                     | 0.86  | 0.415  | 1.779 | 0.684   |
| Weekly                               | 1.114 | 0.646  | 1.922 | 0.698   |
| <b>Physical activity<sup>b</sup></b> |       |        |       |         |
| Low                                  | 1     |        |       |         |
| Moderate                             | 0.906 | 0.495  | 1.656 | 0.748   |

|                                       |       |       |       |       |
|---------------------------------------|-------|-------|-------|-------|
| High                                  | 0.639 | 0.342 | 1.195 | 0.161 |
| High waist circumference <sup>c</sup> |       |       |       |       |
| No                                    | 1     |       |       |       |
| Yes                                   | 1.564 | 1.047 | 2.335 | 0.029 |
| Diabetes <sup>d</sup>                 |       |       |       |       |
| No                                    | 1     |       |       |       |
| Yes                                   | 1.047 | 0.438 | 2.506 | 0.917 |
| High triglycerides <sup>e</sup>       |       |       |       |       |
| No                                    | 1     |       |       |       |
| Yes                                   | 1.126 | 0.776 | 1.633 | 0.532 |

<sup>a</sup> Based on a household asset index score.

<sup>b</sup> Based on the International Physical Activity Questionnaire (IPAQ).

<sup>c</sup> Greater than 102cm for men and 88cm for women.

<sup>d</sup> Blood glucose greater than or equal to 11.1.

<sup>e</sup> Greater than or equal to 1.7 mmol/l.



**Supplemental Table 3.** Multivariable Poisson regression of incident hypertension on sociodemographic, health (using BMI instead of waist circumference) and behavioral risk factors, and HIV and ART status among those completing baseline and follow-up time points (n=579).

|                                | aIRR  | 95% CI |       | p-value |
|--------------------------------|-------|--------|-------|---------|
|                                |       | Lower  | Upper |         |
| Gender                         |       |        |       |         |
| Male                           | 1     |        |       |         |
| Female                         | 0.911 | 0.595  | 1.396 | 0.669   |
| Age groups                     |       |        |       |         |
| 40-49                          | 1     |        |       |         |
| 50-59                          | 1.906 | 1.237  | 2.938 | 0.003   |
| 60-69                          | 2.38  | 1.426  | 3.972 | 0.001   |
| 70-79                          | 2.649 | 1.444  | 4.857 | 0.002   |
| 80+                            | 2.335 | 1.055  | 5.168 | 0.036   |
| Education                      |       |        |       |         |
| None                           | 1     |        |       |         |
| Less than secondary            | 1.128 | 0.775  | 1.642 | 0.53    |
| Secondary or more              | 0.746 | 0.365  | 1.525 | 0.421   |
| Union status                   |       |        |       |         |
| Not in union                   | 1     |        |       |         |
| Formal/informal union          | 0.971 | 0.685  | 1.376 | 0.867   |
| SES <sup>a</sup>               |       |        |       |         |
| Low                            | 1     |        |       |         |
| Middle                         | 0.927 | 0.619  | 1.389 | 0.714   |
| High                           | 0.778 | 0.498  | 1.215 | 0.269   |
| Employment status              |       |        |       |         |
| Not employed                   | 1     |        |       |         |
| Employed                       | 1.526 | 1.014  | 2.295 | 0.043   |
| Smoking history                |       |        |       |         |
| Never                          | 1     |        |       |         |
| Prior                          | 0.732 | 0.342  | 1.565 | 0.421   |
| Current                        | 0.716 | 0.372  | 1.378 | 0.317   |
| Alcohol use                    |       |        |       |         |
| Not in past 30 days            | 1     |        |       |         |
| Less than weekly               | 0.752 | 0.363  | 1.559 | 0.444   |
| Weekly                         | 1.037 | 0.628  | 1.711 | 0.887   |
| Physical activity <sup>b</sup> |       |        |       |         |

|    |                            |       |       |       |       |
|----|----------------------------|-------|-------|-------|-------|
| 1  |                            |       |       |       |       |
| 2  |                            |       |       |       |       |
| 3  | Low                        | 1     |       |       |       |
| 4  | Moderate                   | 0.721 | 0.419 | 1.242 | 0.239 |
| 5  | High                       | 0.506 | 0.289 | 0.886 | 0.017 |
| 6  |                            |       |       |       |       |
| 7  | Obesity <sup>c</sup>       |       |       |       |       |
| 8  | No                         | 1     |       |       |       |
| 9  | Yes                        | 1.902 | 1.315 | 2.751 | 0.001 |
| 10 |                            |       |       |       |       |
| 11 | Diabetes <sup>d</sup>      |       |       |       |       |
| 12 | No                         | 1     |       |       |       |
| 13 | Yes                        | 0.916 | 0.371 | 2.263 | 0.849 |
| 14 |                            |       |       |       |       |
| 15 | High                       |       |       |       |       |
| 16 | triglycerides <sup>e</sup> |       |       |       |       |
| 17 | No                         | 1     |       |       |       |
| 18 | Yes                        | 1.346 | 0.965 | 1.876 | 0.08  |
| 19 |                            |       |       |       |       |
| 20 | HIV and ART                |       |       |       |       |
| 21 | status                     |       |       |       |       |
| 22 | Negative                   | 1     |       |       |       |
| 23 | Positive, not on           |       |       |       |       |
| 24 | ART                        | 0.504 | 0.315 | 0.809 | 0.004 |
| 25 | Positive, on               |       |       |       |       |
| 26 | ART                        | 0.507 | 0.221 | 1.165 | 0.11  |

<sup>a</sup> Based on a household asset index score.

<sup>b</sup> Based on the International Physical Activity Questionnaire (IPAQ).

<sup>c</sup> Greater than or equal to 30 BMI.

<sup>d</sup> Blood glucose greater than or equal to 11.1.

<sup>e</sup> Greater than or equal to 1.7 mmol/l.

**Supplemental Table 4.** Multivariable Poisson regression of incident hypertension (based on BP threshold only) on sociodemographic, health and behavioral risk factors, and HIV and ART status among those completing baseline and follow-up time points (n=581).

|                                | aIRR  | 95% CI |       | p-value |
|--------------------------------|-------|--------|-------|---------|
|                                |       | Lower  | Upper |         |
| Gender                         |       |        |       |         |
| Male                           | 1     |        |       |         |
| Female                         | 0.773 | 0.455  | 1.315 | 0.343   |
| Age groups                     |       |        |       |         |
| 40-49                          | 1     |        |       |         |
| 50-59                          | 1.902 | 1.17   | 3.093 | 0.01    |
| 60-69                          | 2.06  | 1.166  | 3.641 | 0.013   |
| 70-79                          | 1.432 | 0.658  | 3.117 | 0.366   |
| 80+                            | 1.888 | 0.795  | 4.483 | 0.15    |
| Education                      |       |        |       |         |
| None                           | 1     |        |       |         |
| Less than secondary            | 0.99  | 0.648  | 1.514 | 0.965   |
| Secondary or more              | 0.772 | 0.363  | 1.644 | 0.502   |
| Union status                   |       |        |       |         |
| Not in union                   | 1     |        |       |         |
| In union                       | 0.8   | 0.54   | 1.185 | 0.266   |
| SES <sup>a</sup>               |       |        |       |         |
| Low                            | 1     |        |       |         |
| Middle                         | 0.899 | 0.569  | 1.419 | 0.647   |
| High                           | 0.657 | 0.394  | 1.094 | 0.106   |
| Employment status              |       |        |       |         |
| Not employed                   | 1     |        |       |         |
| Employed                       | 1.747 | 1.093  | 2.792 | 0.02    |
| Smoking history                |       |        |       |         |
| Never                          | 1     |        |       |         |
| Prior                          | 0.612 | 0.237  | 1.581 | 0.311   |
| Current                        | 0.61  | 0.291  | 1.277 | 0.189   |
| Alcohol use                    |       |        |       |         |
| Not in past 30 days            | 1     |        |       |         |
| Less than weekly               | 0.738 | 0.326  | 1.672 | 0.467   |
| Weekly                         | 0.959 | 0.542  | 1.699 | 0.887   |
| Physical activity <sup>b</sup> |       |        |       |         |
| Low                            | 1     |        |       |         |
| Moderate                       | 0.973 | 0.5    | 1.894 | 0.936   |

|                                       |       |       |       |        |
|---------------------------------------|-------|-------|-------|--------|
| High                                  | 0.669 | 0.33  | 1.355 | 0.264  |
| High waist circumference <sup>c</sup> |       |       |       |        |
| No                                    | 1     |       |       |        |
| Yes                                   | 1.361 | 0.882 | 2.102 | 0.164  |
| Diabetes <sup>d</sup>                 |       |       |       |        |
| No                                    | 1     |       |       |        |
| Yes                                   | 0.341 | 0.05  | 2.309 | 0.27   |
| High triglycerides <sup>e</sup>       |       |       |       |        |
| No                                    | 1     |       |       |        |
| Yes                                   | 1.19  | 0.792 | 1.789 | 0.402  |
| HIV and ART status                    |       |       |       |        |
| Negative                              | 1     |       |       |        |
| Positive, not on ART                  | 0.28  | 0.151 | 0.518 | <0.001 |
| Positive, on ART                      | 0.313 | 0.108 | 0.908 | 0.033  |

<sup>a</sup> Based on a household asset index score.

<sup>b</sup> Based on the International Physical Activity Questionnaire (IPAQ).

<sup>c</sup> Greater than 102cm for men and 88cm for women.

<sup>d</sup> Blood glucose greater than or equal to 11.1.

<sup>e</sup> Greater than or equal to 1.7 mmol/l.

**Supplemental Table 5.** Multivariable competing risk regression (Fine-Grey model) of incident hypertension on sociodemographic, health and behavioral risk factors among the full eligible sample (n=662).

|                                       | SHR   | 95% CI |       | p-value |
|---------------------------------------|-------|--------|-------|---------|
|                                       |       | Lower  | Upper |         |
| Gender                                |       |        |       |         |
| Male                                  | 1     |        |       |         |
| Female                                | 0.835 | 0.526  | 1.326 | 0.445   |
| Education                             |       |        |       |         |
| None                                  | 1     |        |       |         |
| Less than secondary                   | 1.1   | 0.766  | 1.58  | 0.607   |
| Secondary or more                     | 0.968 | 0.513  | 1.829 | 0.921   |
| Union status                          |       |        |       |         |
| Not in union                          | 1     |        |       |         |
| Formal/informal union                 | 1.067 | 0.759  | 1.5   | 0.708   |
| SES <sup>a</sup>                      |       |        |       |         |
| Low                                   | 1     |        |       |         |
| Middle                                | 1.021 | 0.689  | 1.512 | 0.919   |
| High                                  | 0.881 | 0.566  | 1.371 | 0.574   |
| Employment status                     |       |        |       |         |
| Not employed                          | 1     |        |       |         |
| Employed                              | 1.969 | 1.374  | 2.821 | <0.001  |
| Smoking history                       |       |        |       |         |
| Never                                 | 1     |        |       |         |
| Prior                                 | 0.772 | 0.38   | 1.57  | 0.475   |
| Current                               | 0.73  | 0.367  | 1.451 | 0.369   |
| Alcohol use                           |       |        |       |         |
| Not in past 30 days                   | 1     |        |       |         |
| Less than weekly                      | 0.882 | 0.432  | 1.798 | 0.729   |
| Weekly                                | 0.899 | 0.506  | 1.597 | 0.716   |
| Physical activity <sup>b</sup>        |       |        |       |         |
| Low                                   | 1     |        |       |         |
| Moderate                              | 1.184 | 0.667  | 2.102 | 0.564   |
| High                                  | 0.914 | 0.512  | 1.633 | 0.761   |
| High waist circumference <sup>c</sup> |       |        |       |         |
| No                                    | 1     |        |       |         |
| Yes                                   | 1.399 | 0.952  | 2.056 | 0.088   |
| Diabetes <sup>d</sup>                 |       |        |       |         |

|    |                            |       |       |       |       |
|----|----------------------------|-------|-------|-------|-------|
| 1  |                            |       |       |       |       |
| 2  |                            |       |       |       |       |
| 3  | No                         | 1     |       |       |       |
| 4  | Yes                        | 1.399 | 0.677 | 2.887 | 0.364 |
| 5  |                            |       |       |       |       |
| 6  | High                       |       |       |       |       |
| 7  | triglycerides <sup>e</sup> |       |       |       |       |
| 8  | No                         | 1     |       |       |       |
| 9  | Yes                        | 1.111 | 0.778 | 1.585 | 0.563 |
| 10 |                            |       |       |       |       |

<sup>a</sup> Based on a household asset index score.

<sup>b</sup> Based on the International Physical Activity Questionnaire (IPAQ).

<sup>c</sup> Greater than 102cm for men and 88cm for women.

<sup>d</sup> Blood glucose greater than or equal to 11.1.

<sup>e</sup> Greater than or equal to 1.7 mmol/l.

For peer review only

**Supplemental Table 6.** Cause of death by broad disease category for the full eligible sample.

| <b>Cause group</b>        | <b>N</b> | <b>%</b> |
|---------------------------|----------|----------|
| HIV/AIDS and TB           | 20       | 28       |
| Other infectious diseases | 16       | 23       |
| Noncommunicable diseases  | 34       | 48       |
| External                  | 1        | 1        |

Cause of death information from InterVA-4. Information on cause of death missing for 4 individuals.

For peer review only

**STROBE 2007 (v4) Statement—Checklist of items that should be included in reports of *cohort studies***

| Section/Topic                | Item # | Recommendation                                                                                                                                                                       | Reported on page # |
|------------------------------|--------|--------------------------------------------------------------------------------------------------------------------------------------------------------------------------------------|--------------------|
| <b>Title and abstract</b>    | 1      | (a) Indicate the study's design with a commonly used term in the title or the abstract                                                                                               | 2                  |
|                              |        | (b) Provide in the abstract an informative and balanced summary of what was done and what was found                                                                                  | 2                  |
| <b>Introduction</b>          |        |                                                                                                                                                                                      |                    |
| Background/rationale         | 2      | Explain the scientific background and rationale for the investigation being reported                                                                                                 | 4-5                |
| Objectives                   | 3      | State specific objectives, including any prespecified hypotheses                                                                                                                     | 5                  |
| <b>Methods</b>               |        |                                                                                                                                                                                      |                    |
| Study design                 | 4      | Present key elements of study design early in the paper                                                                                                                              | 5                  |
| Setting                      | 5      | Describe the setting, locations, and relevant dates, including periods of recruitment, exposure, follow-up, and data collection                                                      | 5                  |
| Participants                 | 6      | (a) Give the eligibility criteria, and the sources and methods of selection of participants. Describe methods of follow-up                                                           | 5                  |
|                              |        | (b) For matched studies, give matching criteria and number of exposed and unexposed                                                                                                  | NA                 |
| Variables                    | 7      | Clearly define all outcomes, exposures, predictors, potential confounders, and effect modifiers. Give diagnostic criteria, if applicable                                             | 6-7                |
| Data sources/<br>measurement | 8*     | For each variable of interest, give sources of data and details of methods of assessment (measurement). Describe comparability of assessment methods if there is more than one group | 6-7                |
| Bias                         | 9      | Describe any efforts to address potential sources of bias                                                                                                                            | 7-8                |
| Study size                   | 10     | Explain how the study size was arrived at                                                                                                                                            | 5                  |
| Quantitative variables       | 11     | Explain how quantitative variables were handled in the analyses. If applicable, describe which groupings were chosen and why                                                         | 7-8                |
| Statistical methods          | 12     | (a) Describe all statistical methods, including those used to control for confounding                                                                                                | 7-8                |
|                              |        | (b) Describe any methods used to examine subgroups and interactions                                                                                                                  | NA                 |
|                              |        | (c) Explain how missing data were addressed                                                                                                                                          | 7-8                |
|                              |        | (d) If applicable, explain how loss to follow-up was addressed                                                                                                                       | 7-8                |
|                              |        | (e) Describe any sensitivity analyses                                                                                                                                                | 8                  |
| <b>Results</b>               |        |                                                                                                                                                                                      |                    |



|                          |     |                                                                                                                                                                                                              |                                 |
|--------------------------|-----|--------------------------------------------------------------------------------------------------------------------------------------------------------------------------------------------------------------|---------------------------------|
| Participants             | 13* | (a) Report numbers of individuals at each stage of study—eg numbers potentially eligible, examined for eligibility, confirmed eligible, included in the study, completing follow-up, and analysed            | 9                               |
|                          |     | (b) Give reasons for non-participation at each stage                                                                                                                                                         | 9                               |
|                          |     | (c) Consider use of a flow diagram                                                                                                                                                                           | Figure 1                        |
| Descriptive data         | 14* | (a) Give characteristics of study participants (eg demographic, clinical, social) and information on exposures and potential confounders                                                                     | 9; Table 1                      |
|                          |     | (b) Indicate number of participants with missing data for each variable of interest                                                                                                                          |                                 |
|                          |     | (c) Summarise follow-up time (eg, average and total amount)                                                                                                                                                  | Table 2                         |
| Outcome data             | 15* | Report numbers of outcome events or summary measures over time                                                                                                                                               | 9                               |
| Main results             | 16  | (a) Give unadjusted estimates and, if applicable, confounder-adjusted estimates and their precision (eg, 95% confidence interval). Make clear which confounders were adjusted for and why they were included | 9-10, Table 2, Table 3, Table 4 |
|                          |     | (b) Report category boundaries when continuous variables were categorized                                                                                                                                    | Table 2, Table 3, Table 4       |
|                          |     | (c) If relevant, consider translating estimates of relative risk into absolute risk for a meaningful time period                                                                                             | NA                              |
| Other analyses           | 17  | Report other analyses done—eg analyses of subgroups and interactions, and sensitivity analyses                                                                                                               | 11                              |
| <b>Discussion</b>        |     |                                                                                                                                                                                                              |                                 |
| Key results              | 18  | Summarise key results with reference to study objectives                                                                                                                                                     | 11-12                           |
| <b>Limitations</b>       |     |                                                                                                                                                                                                              |                                 |
| Interpretation           | 20  | Give a cautious overall interpretation of results considering objectives, limitations, multiplicity of analyses, results from similar studies, and other relevant evidence                                   | 12-14                           |
| Generalisability         | 21  | Discuss the generalisability (external validity) of the study results                                                                                                                                        | 13                              |
| <b>Other information</b> |     |                                                                                                                                                                                                              |                                 |
| Funding                  | 22  | Give the source of funding and the role of the funders for the present study and, if applicable, for the original study on which the present article is based                                                | 15                              |

\*Give information separately for cases and controls in case-control studies and, if applicable, for exposed and unexposed groups in cohort and cross-sectional studies.

**Note:** An Explanation and Elaboration article discusses each checklist item and gives methodological background and published examples of transparent reporting. The STROBE checklist is best used in conjunction with this article (freely available on the Web sites of PLoS Medicine at <http://www.plosmedicine.org/>, Annals of Internal Medicine at <http://www.annals.org/>, and Epidemiology at <http://www.epidem.com/>). Information on the STROBE Initiative is available at [www.strobe-statement.org](http://www.strobe-statement.org).
