# Supplementary material for: Hypertension incidence among middle-aged and older adults: findings from a 5-year prospective study in rural South Africa, 2010–2015
Source: HighWire-hosted journal article supplement (doi:10.1136/bmjopen-2021-049621), 2021-12-01
Supplement: bmjopen-2021-049621supp001_data_supplement.pdf [file bmjopen-2021-049621supp001_data_supplement.pdf]

## SUPPLEMENTARY MATERIALS

**Supplemental Table 1.** Hypertension incidence rates and incidence rate ratios per 100 person-years over 5 years of follow-up (2010-2015), by sociodemographic, health and behavioral factors among the full eligible sample.

| Value                 | Events | PYRS | IR    | 95% CI |       | IRR   | 95% CI |       | p-value |
|-----------------------|--------|------|-------|--------|-------|-------|--------|-------|---------|
|                       |        |      |       | Lower  | Upper |       | Lower  | Upper |         |
| Overall               | 193    | 3187 | 4.579 | 3.911  | 5.361 |       |        |       |         |
| Gender                |        |      |       |        |       |       |        |       |         |
| Male                  | 74     | 1203 | 5.14  | 4.078  | 6.548 | 1     |        |       |         |
| Female                | 119    | 1984 | 4.408 | 3.641  | 5.369 | 0.858 | 0.632  | 1.163 | 0.323   |
| Age groups            |        |      |       |        |       |       |        |       |         |
| 40-49                 | 56     | 1418 | 2.795 | 2.117  | 3.755 | 1     |        |       |         |
| 50-59                 | 47     | 727  | 5.092 | 3.731  | 7.069 | 1.821 | 1.191  | 2.786 | 0.006   |
| 60-69                 | 42     | 514  | 5.478 | 3.876  | 7.848 | 1.96  | 1.25   | 3.073 | 0.003   |
| 70-79                 | 28     | 316  | 6.244 | 4.127  | 9.655 | 2.233 | 1.347  | 3.704 | 0.002   |
| 80+                   | 20     | 212  | 8.825 | 5.585  | 14.45 | 3.157 | 1.83   | 5.445 | <0.001  |
| Education             |        |      |       |        |       |       |        |       |         |
| None                  | 85     | 1134 | 6.774 | 5.397  | 8.574 | 1     |        |       |         |
| Less than secondary   | 92     | 1258 | 6.158 | 4.919  | 7.769 | 0.909 | 0.658  | 1.257 | 0.563   |
| Secondary or more     | 16     | 298  | 3.756 | 2.19   | 6.868 | 0.555 | 0.305  | 1.008 | 0.053   |
| Union status          |        |      |       |        |       |       |        |       |         |
| Not in union          | 91     | 1508 | 4.237 | 3.38   | 5.357 | 1     |        |       |         |
| Formal/informal union | 102    | 1679 | 4.928 | 3.984  | 6.144 | 1.163 | 0.849  | 1.593 | 0.347   |
| SES <sup>a</sup>      |        |      |       |        |       |       |        |       |         |
| Low                   | 68     | 1248 | 3.909 | 3.01   | 5.138 | 1     |        |       |         |
| Middle                | 64     | 975  | 5.612 | 4.325  | 7.372 | 1.436 | 0.986  | 2.089 | 0.059   |
| High                  | 60     | 946  | 4.464 | 3.362  | 6.007 | 1.142 | 0.772  | 1.69  | 0.507   |
| Employment status     |        |      |       |        |       |       |        |       |         |
| Not employed          | 144    | 1970 | 6.057 | 5.062  | 7.284 | 1     |        |       |         |
| Employed              | 48     | 706  | 6.503 | 4.83   | 8.911 | 1.074 | 0.754  | 1.529 | 0.694   |
| Smoking history       |        |      |       |        |       |       |        |       |         |
| Never                 | 163    | 2573 | 4.638 | 3.92   | 5.514 | 1     |        |       |         |
| Prior                 | 11     | 218  | 4.314 | 2.36   | 8.558 | 0.93  | 0.49   | 1.765 | 0.825   |
| Current               | 19     | 396  | 3.89  | 2.441  | 6.48  | 0.839 | 0.506  | 1.391 | 0.496   |
| Alcohol use           |        |      |       |        |       |       |        |       |         |
| Not in past 30 days   | 153    | 2546 | 4.522 | 3.805  | 5.401 | 1     |        |       |         |
| Less than weekly      | 10     | 227  | 3.557 | 1.875  | 7.414 | 0.787 | 0.399  | 1.549 | 0.488   |

|                                       |     |      |        |       |        |       |       |       |       |
|---------------------------------------|-----|------|--------|-------|--------|-------|-------|-------|-------|
| Weekly                                | 30  | 414  | 5.546  | 3.691 | 8.558  | 1.227 | 0.784 | 1.92  | 0.372 |
| Physical activity <sup>b</sup>        |     |      |        |       |        |       |       |       |       |
| Low                                   | 20  | 199  | 6.424  | 3.801 | 11.185 | 1     |       |       |       |
| Moderate                              | 71  | 913  | 6.323  | 4.899 | 8.246  | 0.984 | 0.548 | 1.769 | 0.958 |
| High                                  | 100 | 2017 | 3.798  | 3.073 | 4.733  | 0.591 | 0.335 | 1.043 | 0.07  |
| High waist circumference <sup>c</sup> |     |      |        |       |        |       |       |       |       |
| No                                    | 104 | 2106 | 3.629  | 2.936 | 4.523  | 1     |       |       |       |
| Yes                                   | 78  | 974  | 5.796  | 4.544 | 7.455  | 1.597 | 1.151 | 2.215 | 0.005 |
| Diabetes <sup>d</sup>                 |     |      |        |       |        |       |       |       |       |
| No                                    | 186 | 3095 | 4.513  | 3.851 | 5.311  | 1     |       |       |       |
| Yes                                   | 6   | 81   | 6.868  | 2.92  | 18.668 | 1.522 | 0.64  | 3.621 | 0.342 |
| High triglycerides <sup>e</sup>       |     |      |        |       |        |       |       |       |       |
| No                                    | 122 | 2269 | 4.084  | 3.367 | 4.989  | 1     |       |       |       |
| Yes                                   | 59  | 817  | 5.344  | 4.014 | 7.203  | 1.309 | 0.922 | 1.857 | 0.132 |
| HIV and ART status                    |     |      |        |       |        |       |       |       |       |
| Negative                              | 155 | 1522 | 10.254 | 8.726 | 12.104 | 1     |       |       |       |
| Positive, not on ART                  | 25  | 490  | 4.615  | 3.054 | 7.246  | 0.45  | 0.286 | 0.708 | 0.001 |
| Positive, on ART                      | 6   | 178  | 3.553  | 1.52  | 10.122 | 0.346 | 0.145 | 0.827 | 0.017 |

<sup>a</sup> Based on a household asset index score.

<sup>b</sup> Based on the International Physical Activity Questionnaire (IPAQ).

<sup>c</sup> Greater than 102cm for men and 88cm for women.

<sup>d</sup> Blood glucose greater than or equal to 11.1.

<sup>e</sup> Greater than or equal to 1.7 mmol/l.

**Supplemental Table 2.** Multivariable Poisson regression of incident hypertension on sociodemographic, health and behavioral risk factors among the full eligible sample (n=721).

|                                | aIRR  | 95% CI |       | p-value |
|--------------------------------|-------|--------|-------|---------|
|                                |       | Lower  | Upper |         |
| Gender                         |       |        |       |         |
| Male                           | 1     |        |       |         |
| Female                         | 0.783 | 0.489  | 1.253 | 0.307   |
| Age groups                     |       |        |       |         |
| 40-49                          | 1     |        |       |         |
| 50-59                          | 1.871 | 1.205  | 2.905 | 0.005   |
| 60-69                          | 1.972 | 1.146  | 3.392 | 0.014   |
| 70-79                          | 2.183 | 1.149  | 4.146 | 0.017   |
| 80+                            | 2.86  | 1.305  | 6.265 | 0.009   |
| Education                      |       |        |       |         |
| None                           | 1     |        |       |         |
| Less than secondary            | 0.947 | 0.647  | 1.387 | 0.781   |
| Secondary or more              | 0.607 | 0.3    | 1.227 | 0.164   |
| Union status                   |       |        |       |         |
| Not in union                   | 1     |        |       |         |
| Formal/informal union          | 0.972 | 0.678  | 1.392 | 0.876   |
| SES <sup>a</sup>               |       |        |       |         |
| Low                            | 1     |        |       |         |
| Middle                         | 1.258 | 0.825  | 1.918 | 0.286   |
| High                           | 0.963 | 0.599  | 1.55  | 0.878   |
| Employment status              |       |        |       |         |
| Not employed                   | 1     |        |       |         |
| Employed                       | 1.814 | 1.195  | 2.752 | 0.005   |
| Smoking history                |       |        |       |         |
| Never                          | 1     |        |       |         |
| Prior                          | 0.802 | 0.381  | 1.688 | 0.562   |
| Current                        | 0.71  | 0.362  | 1.393 | 0.32    |
| Alcohol use                    |       |        |       |         |
| Not in past 30 days            | 1     |        |       |         |
| Less than weekly               | 0.86  | 0.415  | 1.779 | 0.684   |
| Weekly                         | 1.114 | 0.646  | 1.922 | 0.698   |
| Physical activity <sup>b</sup> |       |        |       |         |
| Low                            | 1     |        |       |         |
| Moderate                       | 0.906 | 0.495  | 1.656 | 0.748   |

|                                       |       |       |       |       |
|---------------------------------------|-------|-------|-------|-------|
| High waist circumference <sup>c</sup> | 0.639 | 0.342 | 1.195 | 0.161 |
| No                                    | 1     |       |       |       |
| Yes                                   | 1.564 | 1.047 | 2.335 | 0.029 |
| Diabetes <sup>d</sup>                 |       |       |       |       |
| No                                    | 1     |       |       |       |
| Yes                                   | 1.047 | 0.438 | 2.506 | 0.917 |
| High triglycerides <sup>e</sup>       |       |       |       |       |
| No                                    | 1     |       |       |       |
| Yes                                   | 1.126 | 0.776 | 1.633 | 0.532 |

<sup>a</sup> Based on a household asset index score.

<sup>b</sup> Based on the International Physical Activity Questionnaire (IPAQ).

<sup>c</sup> Greater than 102cm for men and 88cm for women.

<sup>d</sup> Blood glucose greater than or equal to 11.1.

<sup>e</sup> Greater than or equal to 1.7 mmol/l.

**Supplemental Table 3.** Multivariable Poisson regression of incident hypertension on sociodemographic, health (using BMI instead of waist circumference) and behavioral risk factors, and HIV and ART status among those completing baseline and follow-up time points (n=579).

|                                      | aIRR  | 95% CI |       | p-value |
|--------------------------------------|-------|--------|-------|---------|
|                                      |       | Lower  | Upper |         |
| <b>Gender</b>                        |       |        |       |         |
| Male                                 | 1     |        |       |         |
| Female                               | 0.911 | 0.595  | 1.396 | 0.669   |
| <b>Age groups</b>                    |       |        |       |         |
| 40-49                                | 1     |        |       |         |
| 50-59                                | 1.906 | 1.237  | 2.938 | 0.003   |
| 60-69                                | 2.38  | 1.426  | 3.972 | 0.001   |
| 70-79                                | 2.649 | 1.444  | 4.857 | 0.002   |
| 80+                                  | 2.335 | 1.055  | 5.168 | 0.036   |
| <b>Education</b>                     |       |        |       |         |
| None                                 | 1     |        |       |         |
| Less than secondary                  | 1.128 | 0.775  | 1.642 | 0.53    |
| Secondary or more                    | 0.746 | 0.365  | 1.525 | 0.421   |
| <b>Union status</b>                  |       |        |       |         |
| Not in union                         | 1     |        |       |         |
| Formal/informal union                | 0.971 | 0.685  | 1.376 | 0.867   |
| <b>SES<sup>a</sup></b>               |       |        |       |         |
| Low                                  | 1     |        |       |         |
| Middle                               | 0.927 | 0.619  | 1.389 | 0.714   |
| High                                 | 0.778 | 0.498  | 1.215 | 0.269   |
| <b>Employment status</b>             |       |        |       |         |
| Not employed                         | 1     |        |       |         |
| Employed                             | 1.526 | 1.014  | 2.295 | 0.043   |
| <b>Smoking history</b>               |       |        |       |         |
| Never                                | 1     |        |       |         |
| Prior                                | 0.732 | 0.342  | 1.565 | 0.421   |
| Current                              | 0.716 | 0.372  | 1.378 | 0.317   |
| <b>Alcohol use</b>                   |       |        |       |         |
| Not in past 30 days                  | 1     |        |       |         |
| Less than weekly                     | 0.752 | 0.363  | 1.559 | 0.444   |
| Weekly                               | 1.037 | 0.628  | 1.711 | 0.887   |
| <b>Physical activity<sup>b</sup></b> |       |        |       |         |

|                                 |       |       |       |       |
|---------------------------------|-------|-------|-------|-------|
| Low                             | 1     |       |       |       |
| Moderate                        | 0.721 | 0.419 | 1.242 | 0.239 |
| High                            | 0.506 | 0.289 | 0.886 | 0.017 |
| Obesity <sup>c</sup>            |       |       |       |       |
| No                              | 1     |       |       |       |
| Yes                             | 1.902 | 1.315 | 2.751 | 0.001 |
| Diabetes <sup>d</sup>           |       |       |       |       |
| No                              | 1     |       |       |       |
| Yes                             | 0.916 | 0.371 | 2.263 | 0.849 |
| High triglycerides <sup>e</sup> |       |       |       |       |
| No                              | 1     |       |       |       |
| Yes                             | 1.346 | 0.965 | 1.876 | 0.08  |
| HIV and ART status              |       |       |       |       |
| Negative                        | 1     |       |       |       |
| Positive, not on ART            | 0.504 | 0.315 | 0.809 | 0.004 |
| Positive, on ART                | 0.507 | 0.221 | 1.165 | 0.11  |

<sup>a</sup> Based on a household asset index score.

<sup>b</sup> Based on the International Physical Activity Questionnaire (IPAQ).

<sup>c</sup> Greater than or equal to 30 BMI.

<sup>d</sup> Blood glucose greater than or equal to 11.1.

<sup>e</sup> Greater than or equal to 1.7 mmol/l.

**Supplemental Table 4.** Multivariable Poisson regression of incident hypertension (based on BP threshold only) on sociodemographic, health and behavioral risk factors, and HIV and ART status among those completing baseline and follow-up time points (n=581).

|                                | aIRR  | 95% CI |       | p-value |
|--------------------------------|-------|--------|-------|---------|
|                                |       | Lower  | Upper |         |
| Gender                         |       |        |       |         |
| Male                           | 1     |        |       |         |
| Female                         | 0.773 | 0.455  | 1.315 | 0.343   |
| Age groups                     |       |        |       |         |
| 40-49                          | 1     |        |       |         |
| 50-59                          | 1.902 | 1.17   | 3.093 | 0.01    |
| 60-69                          | 2.06  | 1.166  | 3.641 | 0.013   |
| 70-79                          | 1.432 | 0.658  | 3.117 | 0.366   |
| 80+                            | 1.888 | 0.795  | 4.483 | 0.15    |
| Education                      |       |        |       |         |
| None                           | 1     |        |       |         |
| Less than secondary            | 0.99  | 0.648  | 1.514 | 0.965   |
| Secondary or more              | 0.772 | 0.363  | 1.644 | 0.502   |
| Union status                   |       |        |       |         |
| Not in union                   | 1     |        |       |         |
| In union                       | 0.8   | 0.54   | 1.185 | 0.266   |
| SES <sup>a</sup>               |       |        |       |         |
| Low                            | 1     |        |       |         |
| Middle                         | 0.899 | 0.569  | 1.419 | 0.647   |
| High                           | 0.657 | 0.394  | 1.094 | 0.106   |
| Employment status              |       |        |       |         |
| Not employed                   | 1     |        |       |         |
| Employed                       | 1.747 | 1.093  | 2.792 | 0.02    |
| Smoking history                |       |        |       |         |
| Never                          | 1     |        |       |         |
| Prior                          | 0.612 | 0.237  | 1.581 | 0.311   |
| Current                        | 0.61  | 0.291  | 1.277 | 0.189   |
| Alcohol use                    |       |        |       |         |
| Not in past 30 days            | 1     |        |       |         |
| Less than weekly               | 0.738 | 0.326  | 1.672 | 0.467   |
| Weekly                         | 0.959 | 0.542  | 1.699 | 0.887   |
| Physical activity <sup>b</sup> |       |        |       |         |
| Low                            | 1     |        |       |         |
| Moderate                       | 0.973 | 0.5    | 1.894 | 0.936   |

|                                       |       |       |       |        |
|---------------------------------------|-------|-------|-------|--------|
| High waist circumference <sup>c</sup> | 0.669 | 0.33  | 1.355 | 0.264  |
| No                                    | 1     |       |       |        |
| Yes                                   | 1.361 | 0.882 | 2.102 | 0.164  |
| Diabetes <sup>d</sup>                 |       |       |       |        |
| No                                    | 1     |       |       |        |
| Yes                                   | 0.341 | 0.05  | 2.309 | 0.27   |
| High triglycerides <sup>e</sup>       |       |       |       |        |
| No                                    | 1     |       |       |        |
| Yes                                   | 1.19  | 0.792 | 1.789 | 0.402  |
| HIV and ART status                    |       |       |       |        |
| Negative                              | 1     |       |       |        |
| Positive, not on ART                  | 0.28  | 0.151 | 0.518 | <0.001 |
| Positive, on ART                      | 0.313 | 0.108 | 0.908 | 0.033  |

<sup>a</sup> Based on a household asset index score.

<sup>b</sup> Based on the International Physical Activity Questionnaire (IPAQ).

<sup>c</sup> Greater than 102cm for men and 88cm for women.

<sup>d</sup> Blood glucose greater than or equal to 11.1.

<sup>e</sup> Greater than or equal to 1.7 mmol/l.



**Supplemental Table 5.** Multivariable competing risk regression (Fine-Gray model) of incident hypertension on sociodemographic, health and behavioral risk factors among the full eligible sample (n=662).

|                                       | SHR   | 95% CI |       | p-value |
|---------------------------------------|-------|--------|-------|---------|
|                                       |       | Lower  | Upper |         |
| Gender                                |       |        |       |         |
| Male                                  | 1     |        |       |         |
| Female                                | 0.835 | 0.526  | 1.326 | 0.445   |
| Education                             |       |        |       |         |
| None                                  | 1     |        |       |         |
| Less than secondary                   | 1.1   | 0.766  | 1.58  | 0.607   |
| Secondary or more                     | 0.968 | 0.513  | 1.829 | 0.921   |
| Union status                          |       |        |       |         |
| Not in union                          | 1     |        |       |         |
| Formal/informal union                 | 1.067 | 0.759  | 1.5   | 0.708   |
| SES <sup>a</sup>                      |       |        |       |         |
| Low                                   | 1     |        |       |         |
| Middle                                | 1.021 | 0.689  | 1.512 | 0.919   |
| High                                  | 0.881 | 0.566  | 1.371 | 0.574   |
| Employment status                     |       |        |       |         |
| Not employed                          | 1     |        |       |         |
| Employed                              | 1.969 | 1.374  | 2.821 | <0.001  |
| Smoking history                       |       |        |       |         |
| Never                                 | 1     |        |       |         |
| Prior                                 | 0.772 | 0.38   | 1.57  | 0.475   |
| Current                               | 0.73  | 0.367  | 1.451 | 0.369   |
| Alcohol use                           |       |        |       |         |
| Not in past 30 days                   | 1     |        |       |         |
| Less than weekly                      | 0.882 | 0.432  | 1.798 | 0.729   |
| Weekly                                | 0.899 | 0.506  | 1.597 | 0.716   |
| Physical activity <sup>b</sup>        |       |        |       |         |
| Low                                   | 1     |        |       |         |
| Moderate                              | 1.184 | 0.667  | 2.102 | 0.564   |
| High                                  | 0.914 | 0.512  | 1.633 | 0.761   |
| High waist circumference <sup>c</sup> |       |        |       |         |
| No                                    | 1     |        |       |         |
| Yes                                   | 1.399 | 0.952  | 2.056 | 0.088   |
| Diabetes <sup>d</sup>                 |       |        |       |         |

|                                 |       |       |       |       |
|---------------------------------|-------|-------|-------|-------|
| No                              | 1     |       |       |       |
| Yes                             | 1.399 | 0.677 | 2.887 | 0.364 |
| High triglycerides <sup>c</sup> |       |       |       |       |
| No                              | 1     |       |       |       |
| Yes                             | 1.111 | 0.778 | 1.585 | 0.563 |

<sup>a</sup> Based on a household asset index score.

<sup>b</sup> Based on the International Physical Activity Questionnaire (IPAQ).

<sup>c</sup> Greater than 102cm for men and 88cm for women.

<sup>d</sup> Blood glucose greater than or equal to 11.1.

<sup>e</sup> Greater than or equal to 1.7 mmol/l.

**Supplemental Table 6.** Cause of death by broad disease category for the full eligible sample.

| <b>Cause group</b>        | <b>N</b> | <b>%</b> |
|---------------------------|----------|----------|
| HIV/AIDS and TB           | 20       | 28       |
| Other infectious diseases | 16       | 23       |
| Noncommunicable diseases  | 34       | 48       |
| External                  | 1        | 1        |

Cause of death information from InterVA-4. Information on cause of death missing for 4 individuals.
